# Supplementary material for: The Erlang distribution approximates the age distribution of incidence of childhood and young adulthood cancers
Source: PeerJ journal article supplement (doi:10.7717/peerj.11976), 2021-08-06
Supplement: Supplemental_Material.pdf [file Supplemental_Material.pdf]

**Supplemental Material for “The Erlang distribution approximates the age distribution of incidence of childhood and young adulthood cancers” by Aleksey V. Belikov, Alexey D. Vyatkin and Sergey V. Leonov**

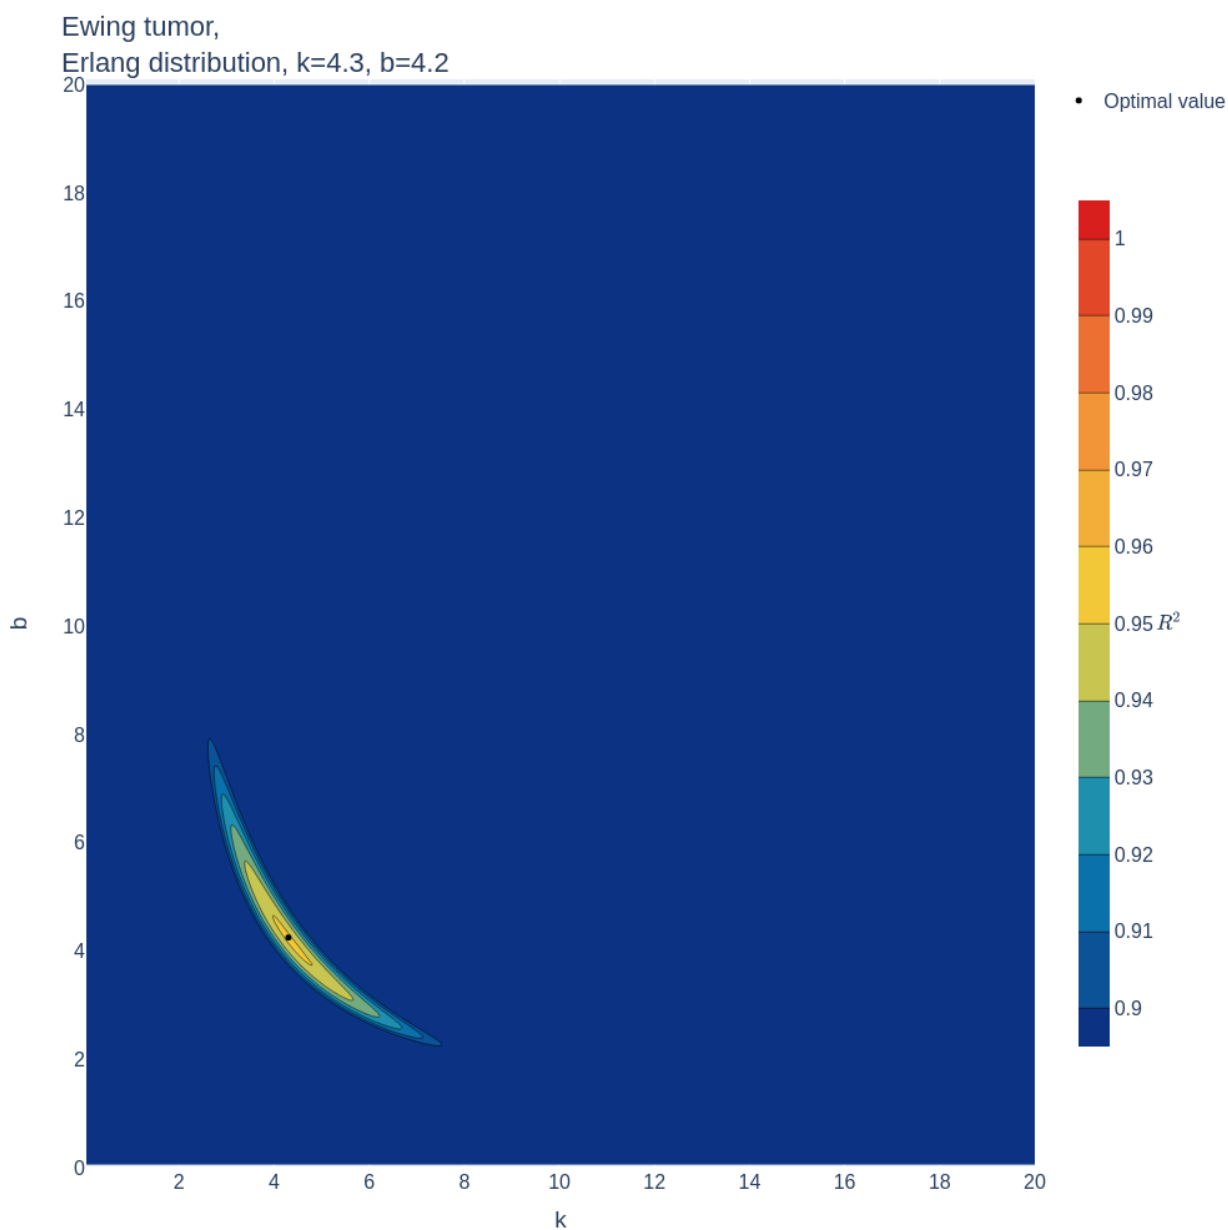

**Web Figure 1. Goodness of fit of the gamma/Erlang distribution to the age distribution of incidence of Ewing tumor as a function of various parameter combinations.**

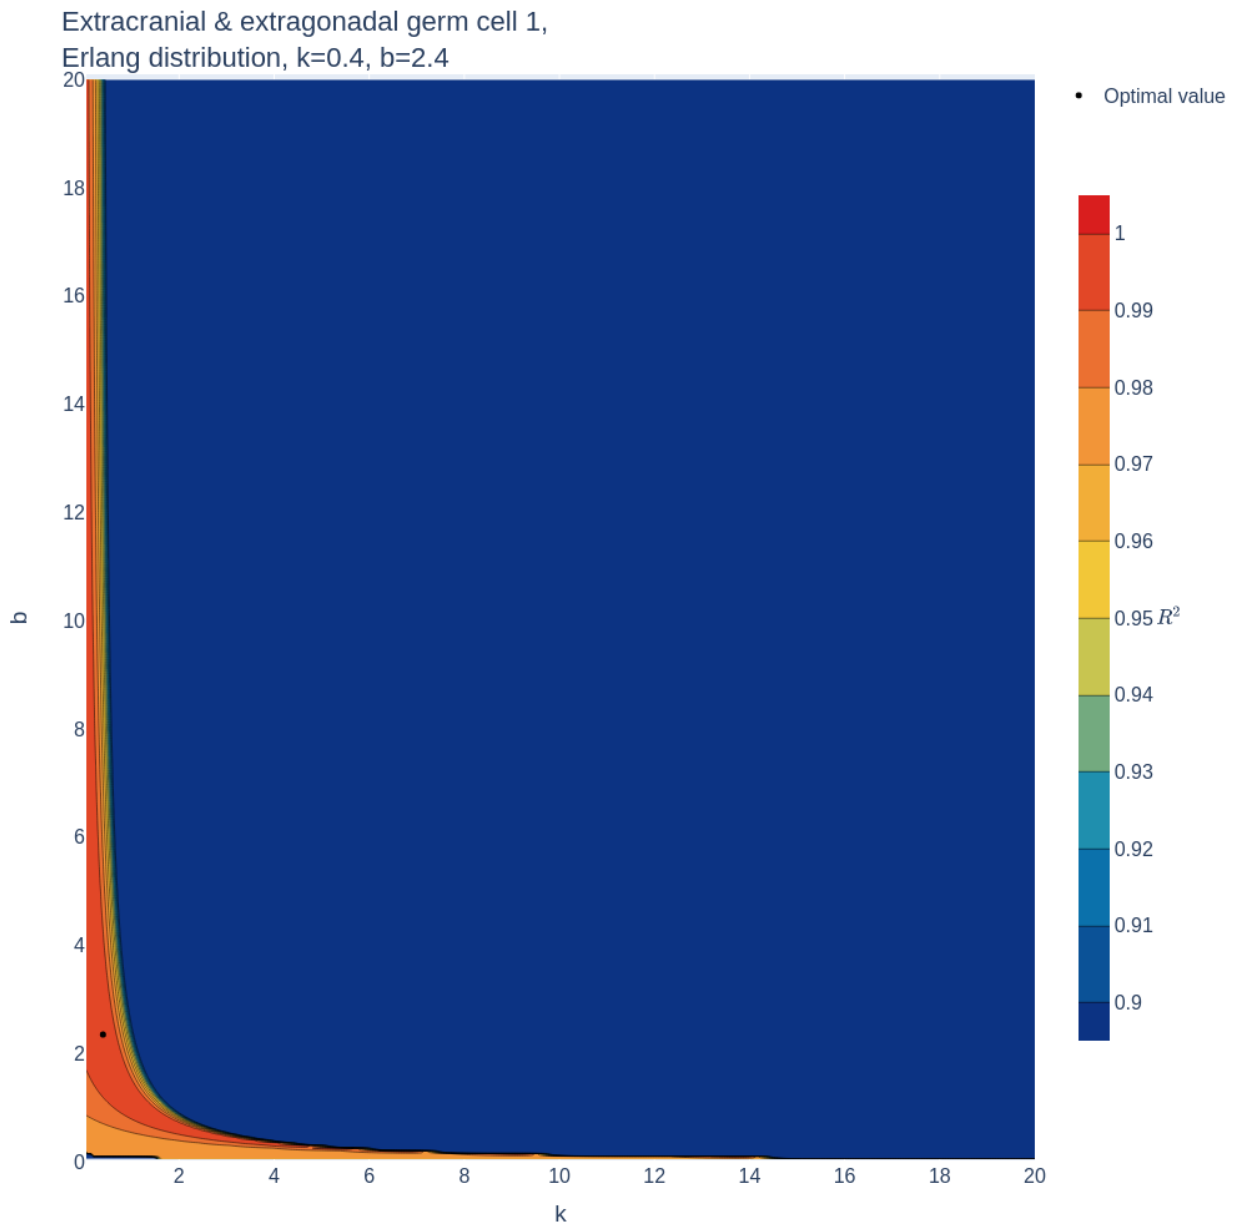

**Web Figure 2. Goodness of fit of the gamma/Erlang distribution to the age distribution of incidence of extracranial and extragonadal germ cell tumors of childhood as a function of various parameter combinations.**

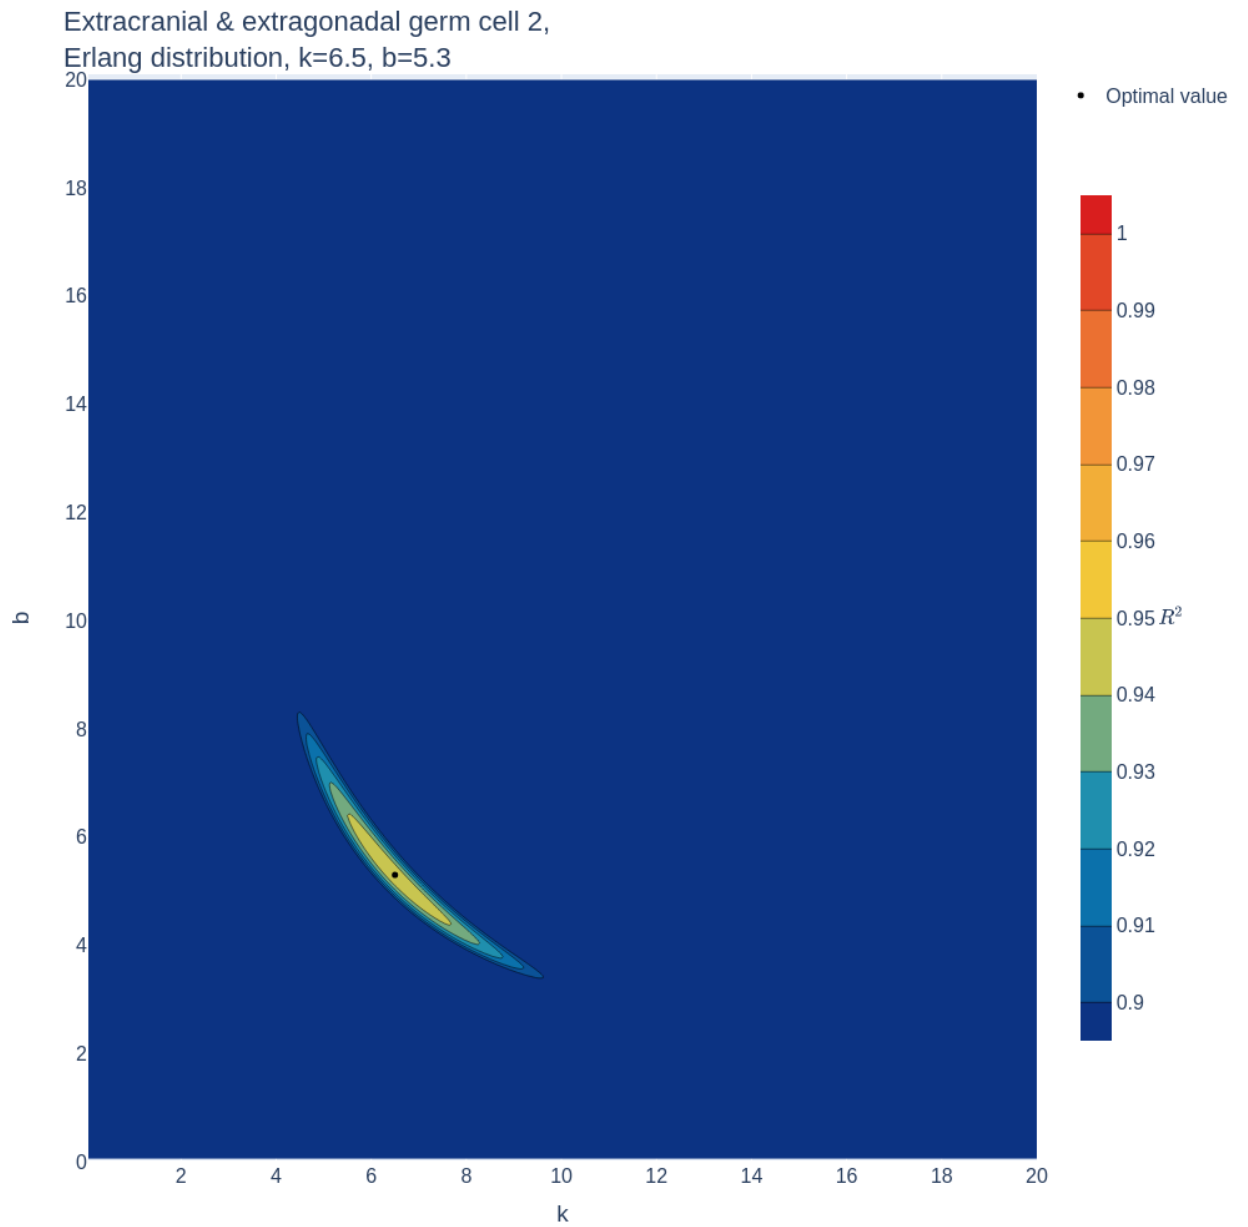

**Web Figure 3. Goodness of fit of the gamma/Erlang distribution to the age distribution of incidence of extracranial and extragonadal germ cell tumors of young adulthood as a function of various parameter combinations.**

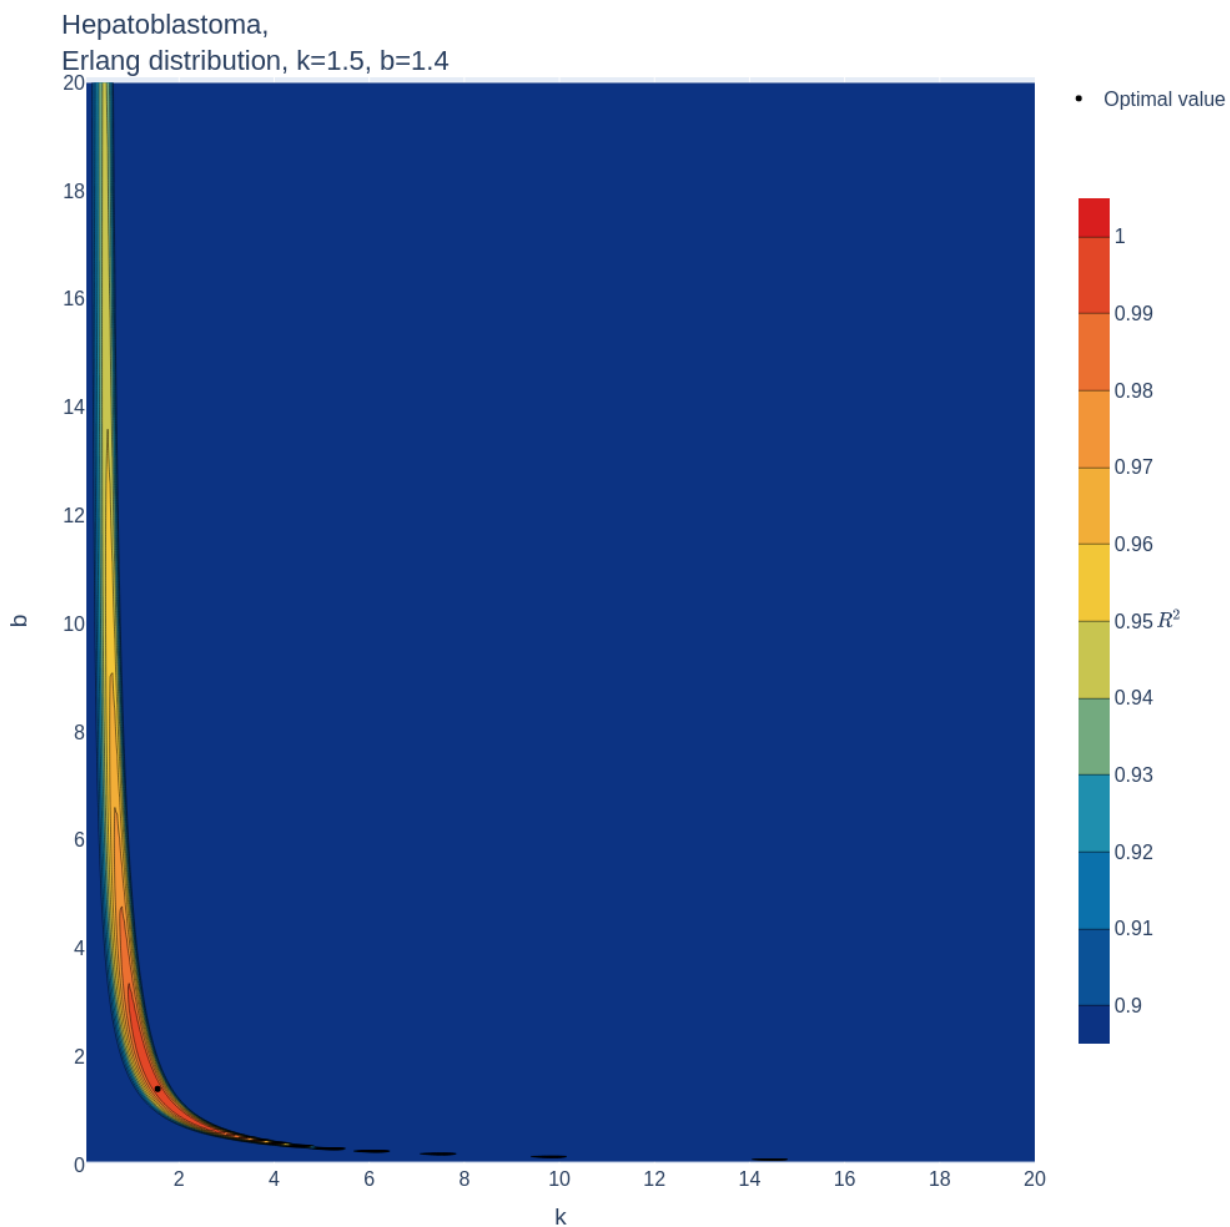

**Web Figure 4. Goodness of fit of the gamma/Erlang distribution to the age distribution of incidence of hepatoblastoma as a function of various parameter combinations.**

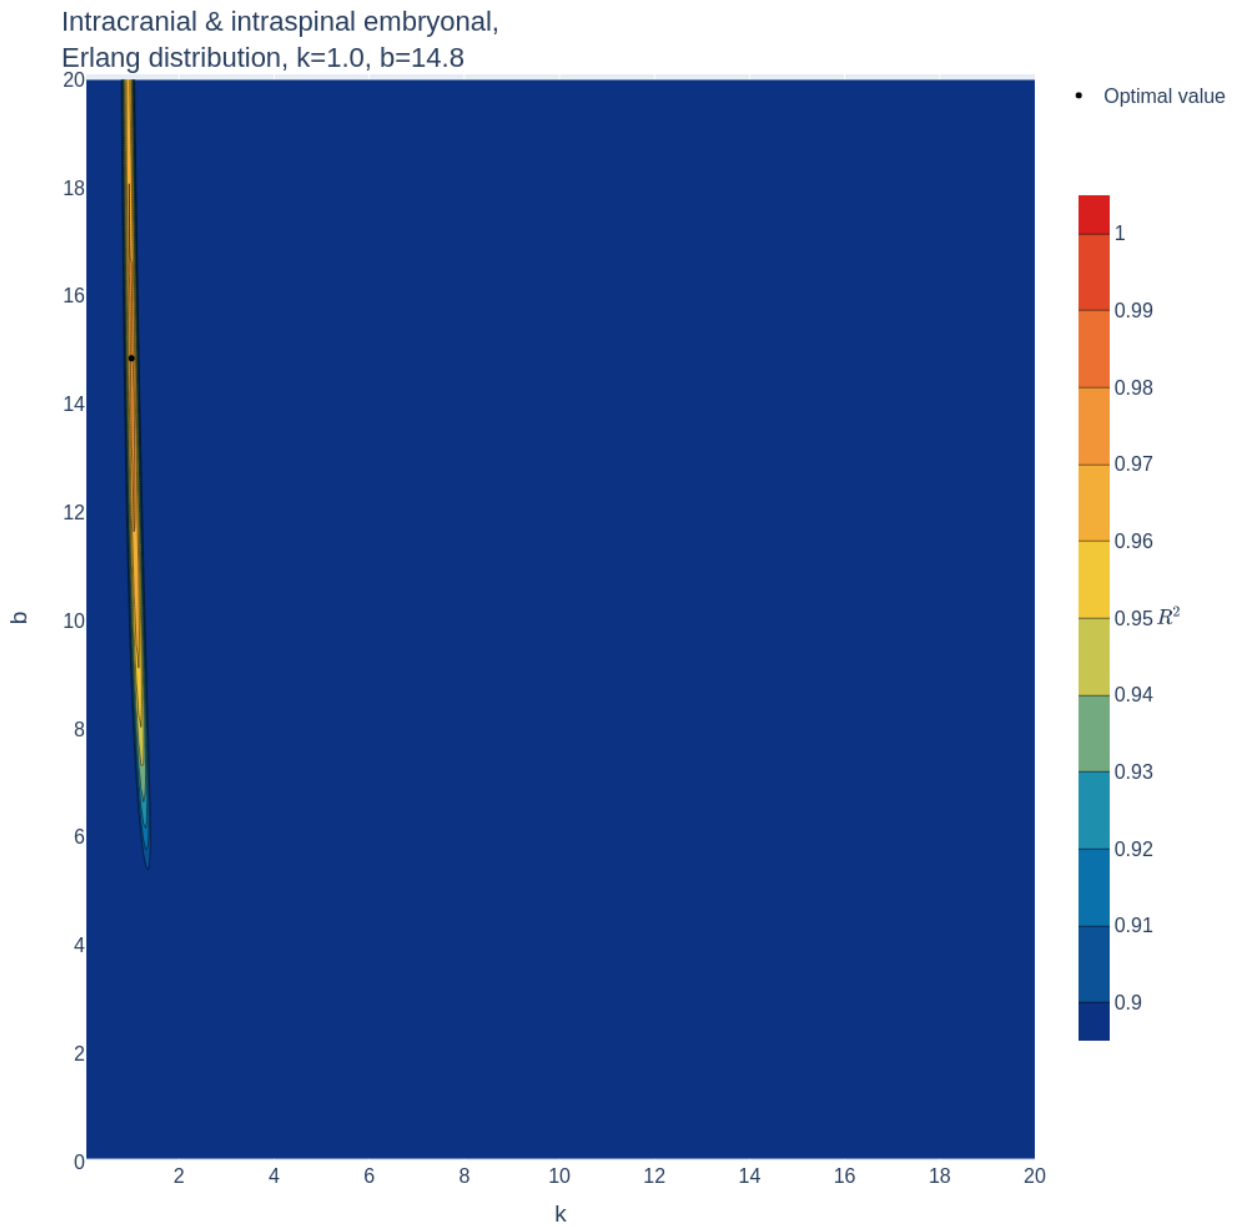

**Web Figure 5. Goodness of fit of the gamma/Erlang distribution to the age distribution of incidence of intracranial and intraspinal embryonal tumors as a function of various parameter combinations.**

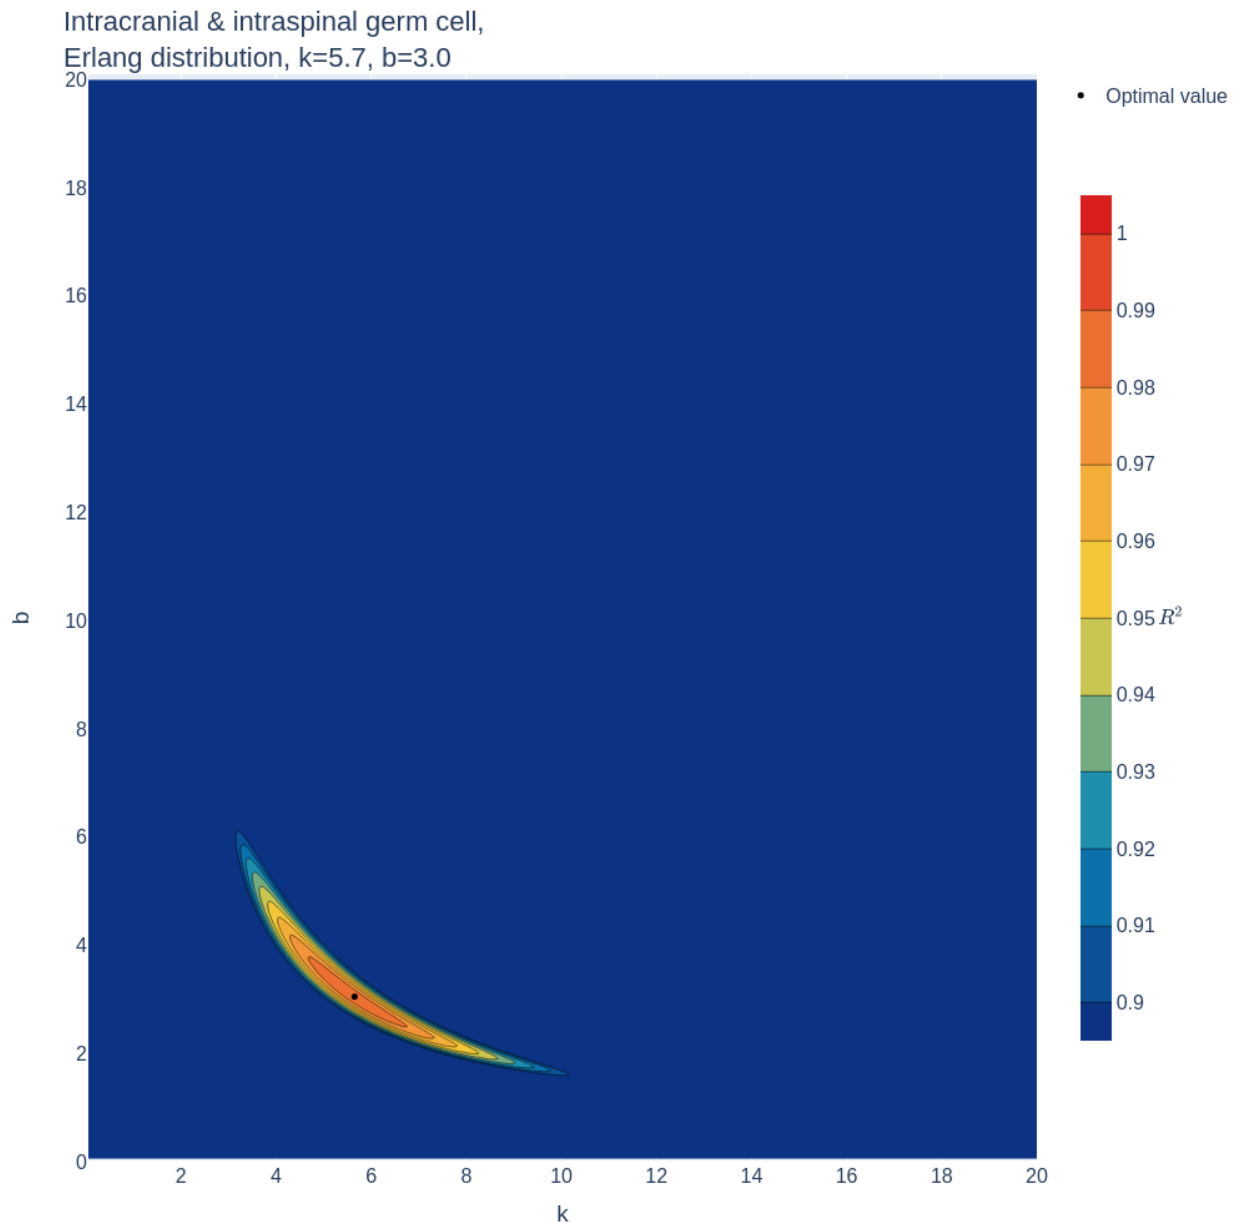

**Web Figure 6. Goodness of fit of the gamma/Erlang distribution to the age distribution of incidence of intracranial and intraspinal germ cell tumors as a function of various parameter combinations.**

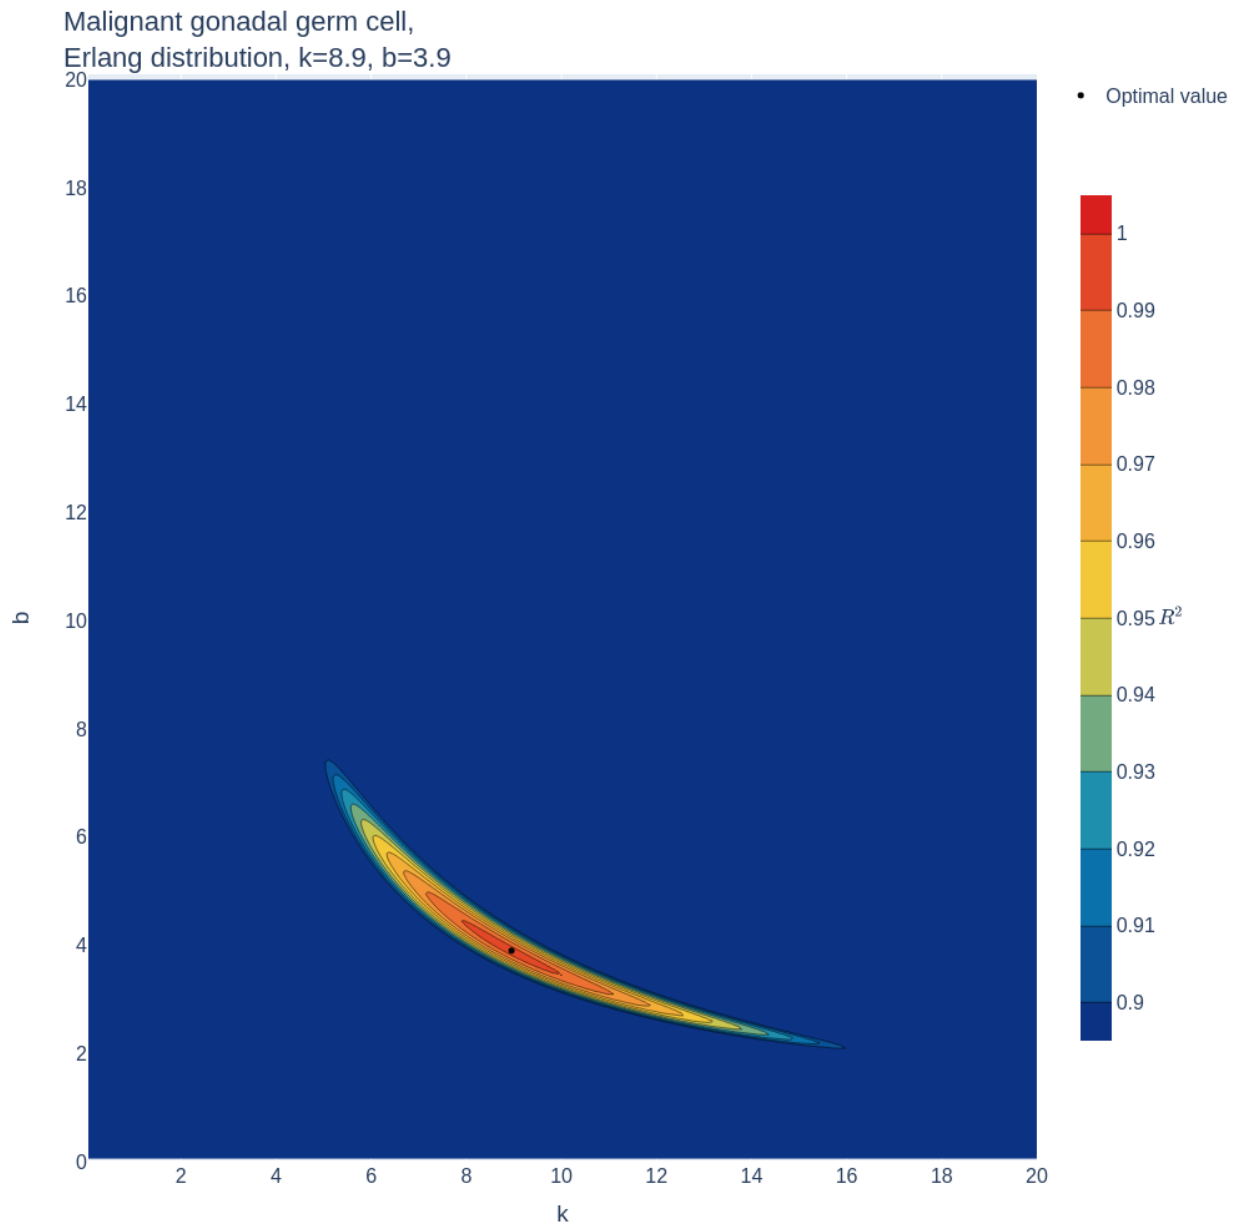

**Web Figure 7. Goodness of fit of the gamma/Erlang distribution to the age distribution of incidence of malignant gonadal germ cell tumors as a function of various parameter combinations.**

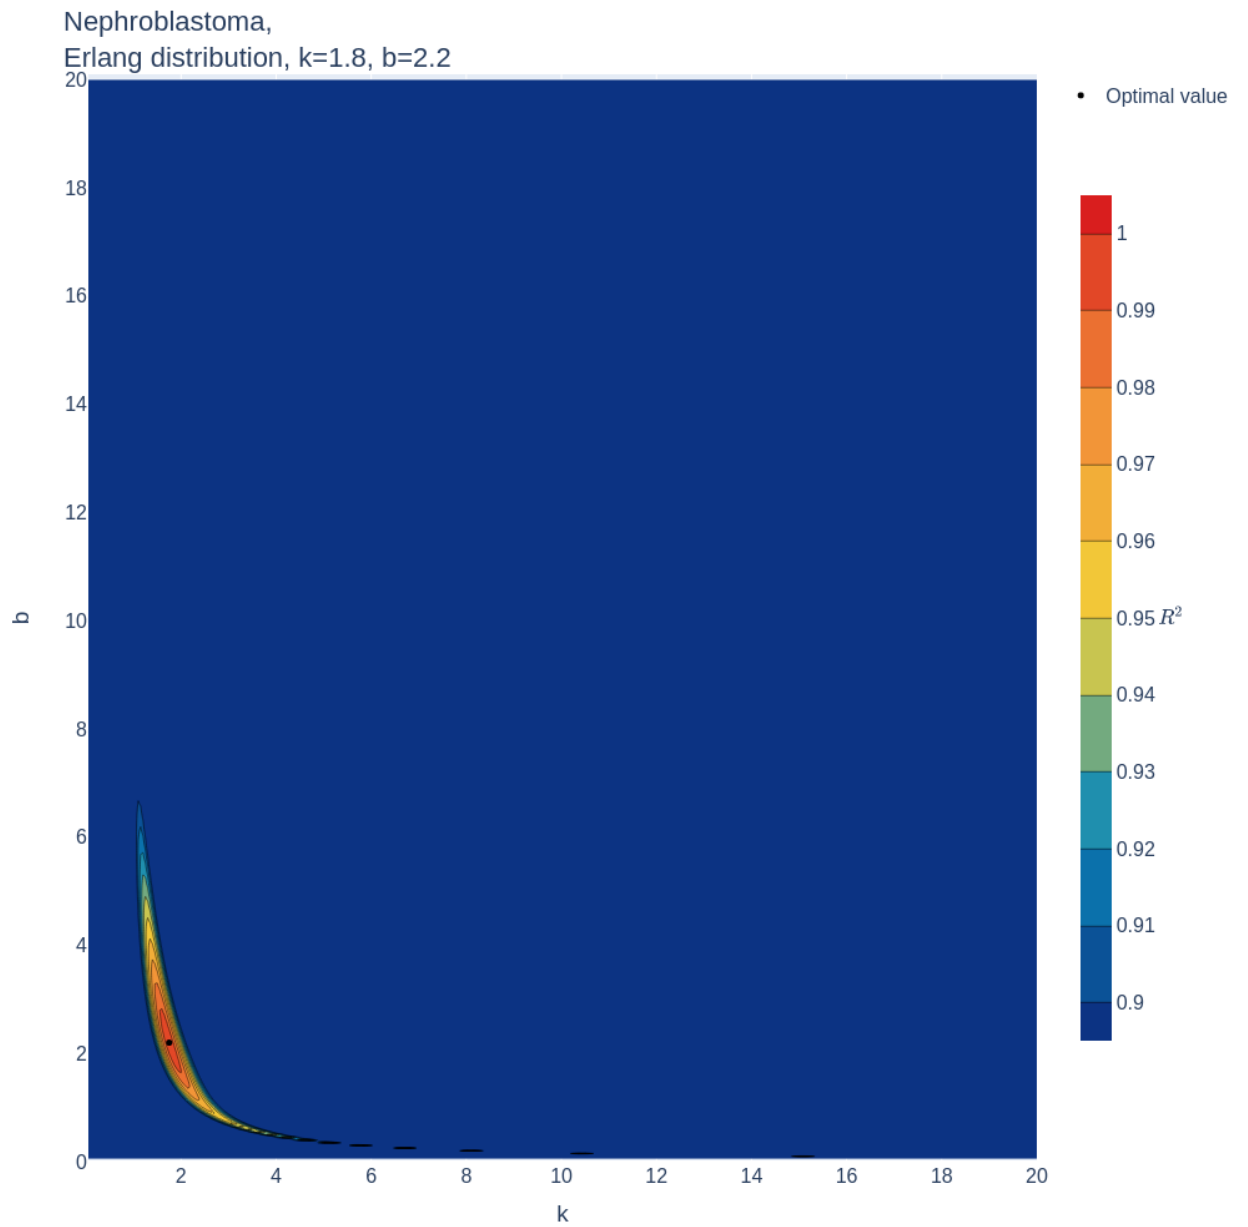

**Web Figure 8. Goodness of fit of the gamma/Erlang distribution to the age distribution of incidence of nephroblastoma as a function of various parameter combinations.**



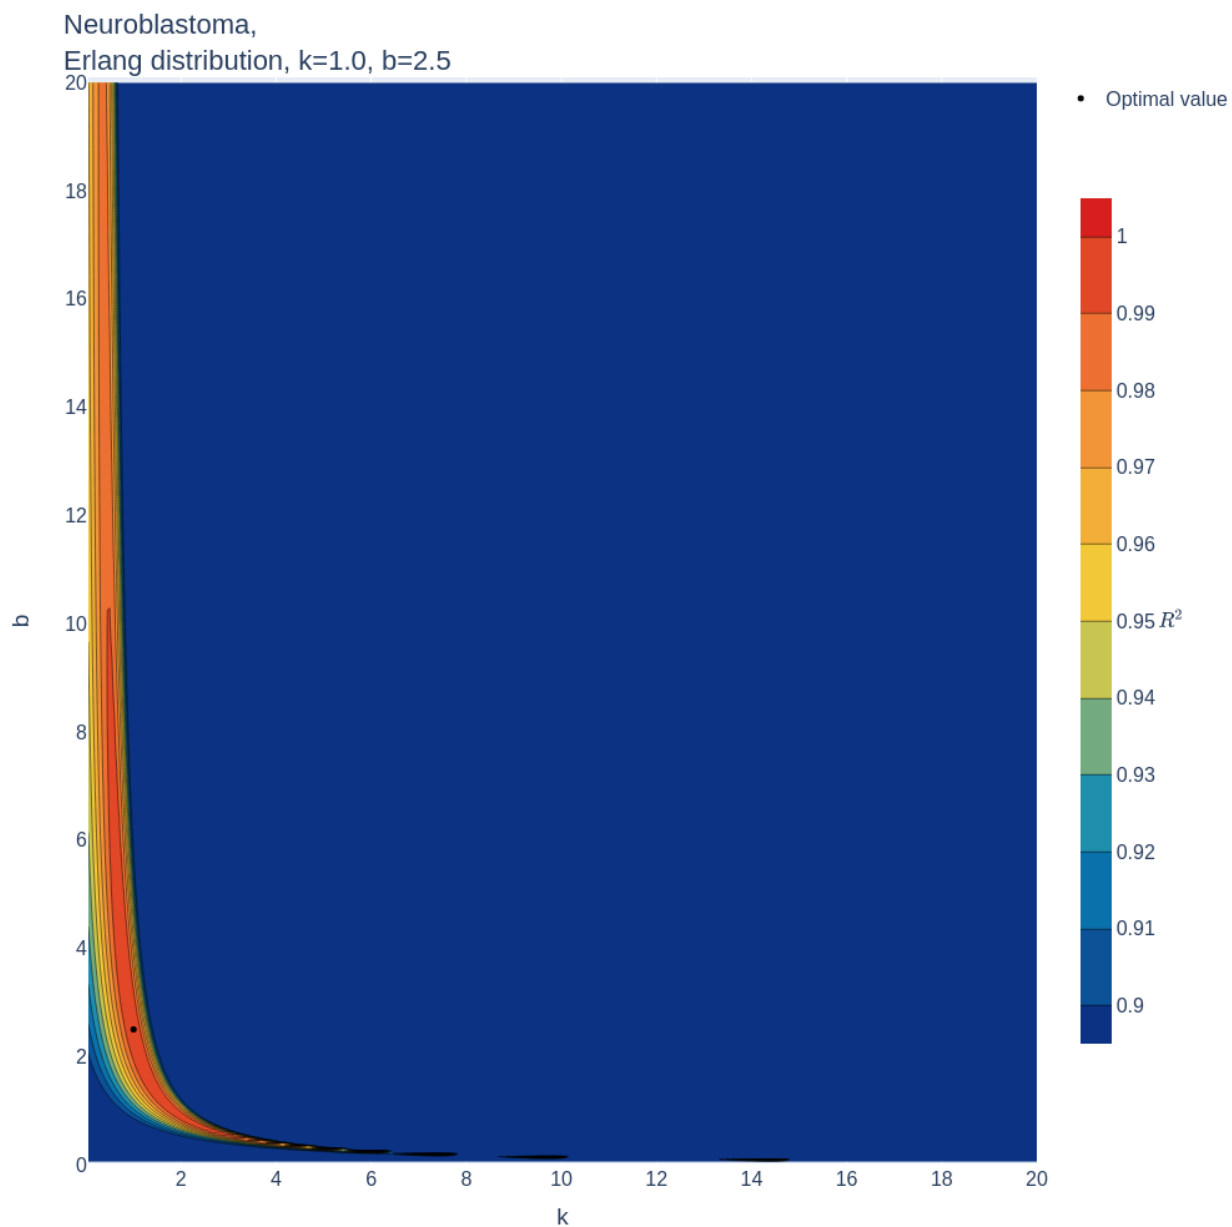

**Web Figure 9. Goodness of fit of the gamma/Erlang distribution to the age distribution of incidence of neuroblastoma as a function of various parameter combinations.**

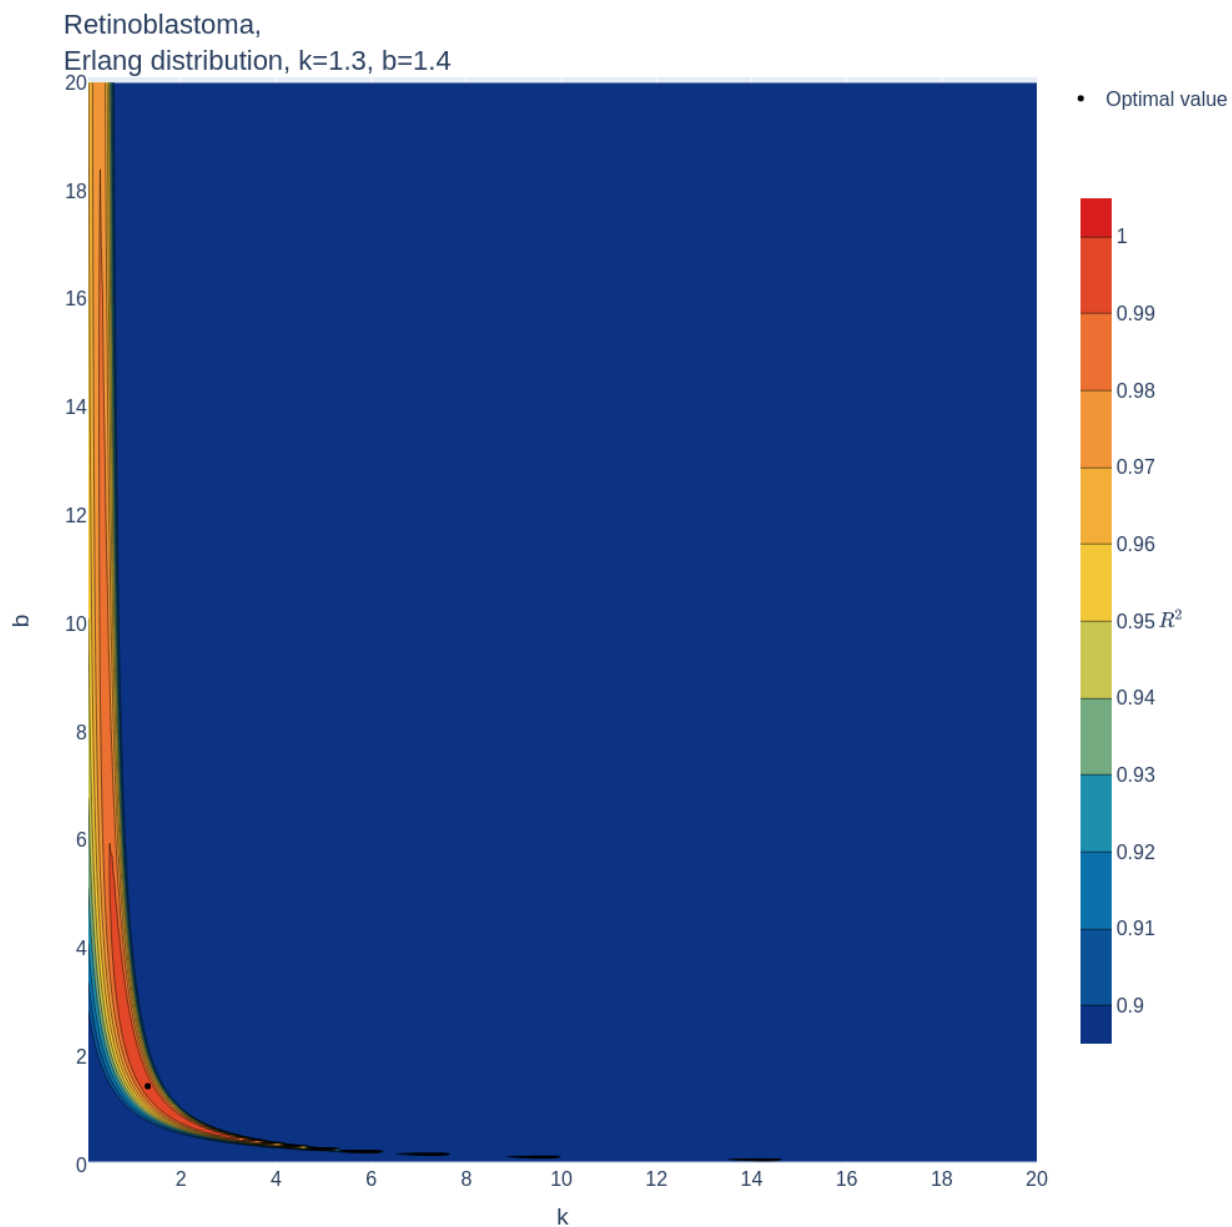

**Web Figure 10. Goodness of fit of the gamma/Erlang distribution to the age distribution of incidence of retinoblastoma as a function of various parameter combinations.**

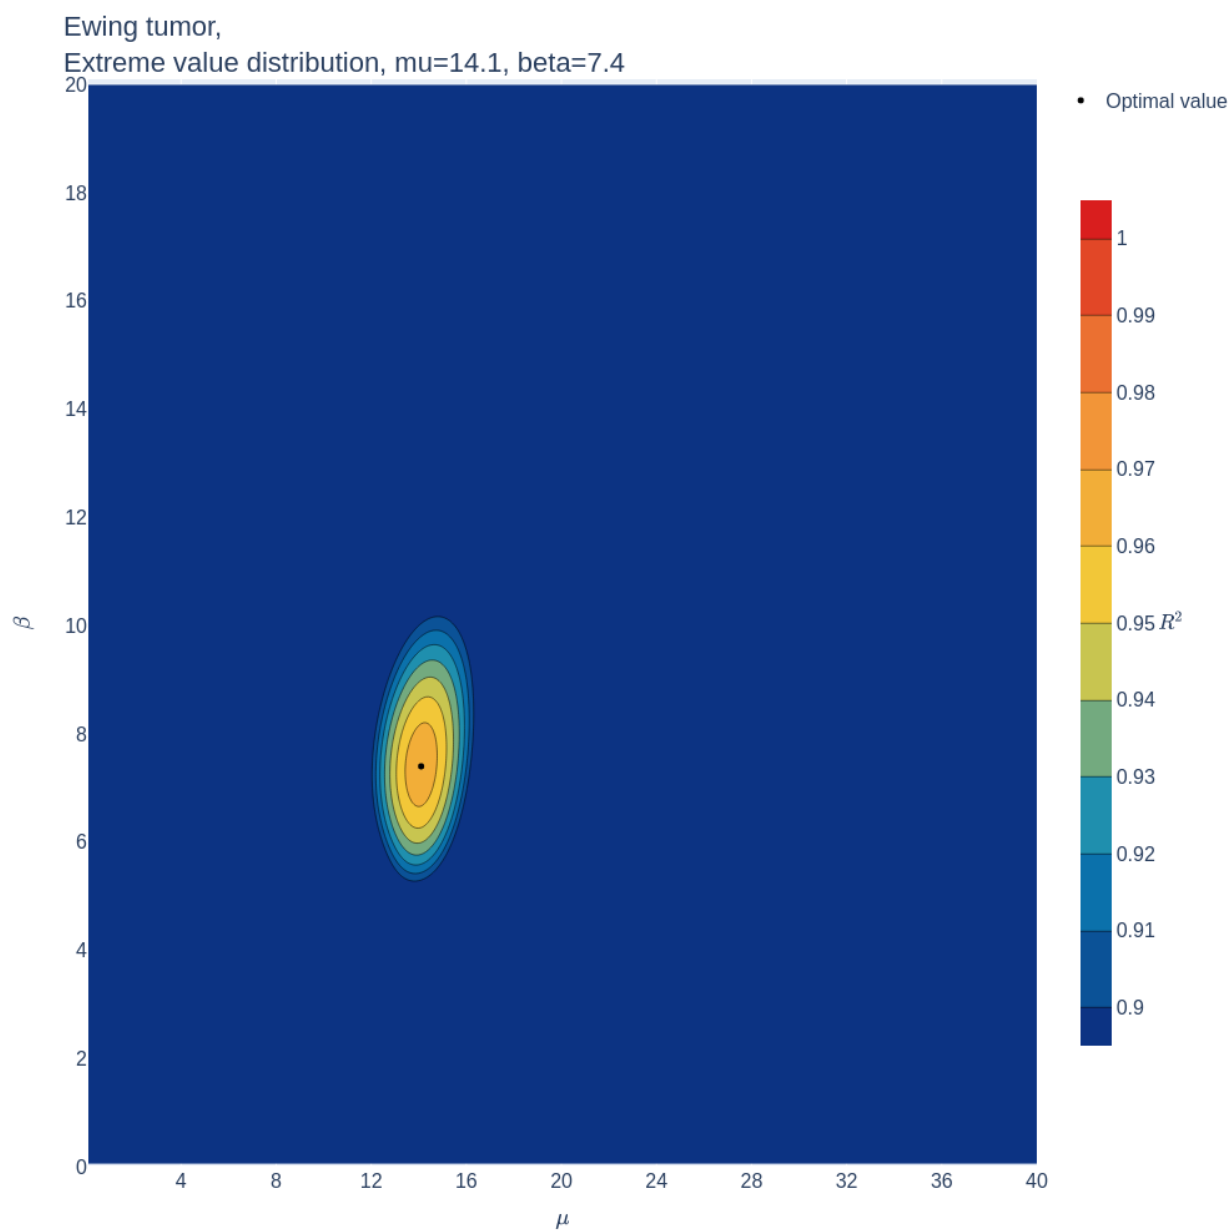

**Web Figure 11. Goodness of fit of the extreme value distribution to the age distribution of incidence of Ewing tumor as a function of various parameter combinations.**

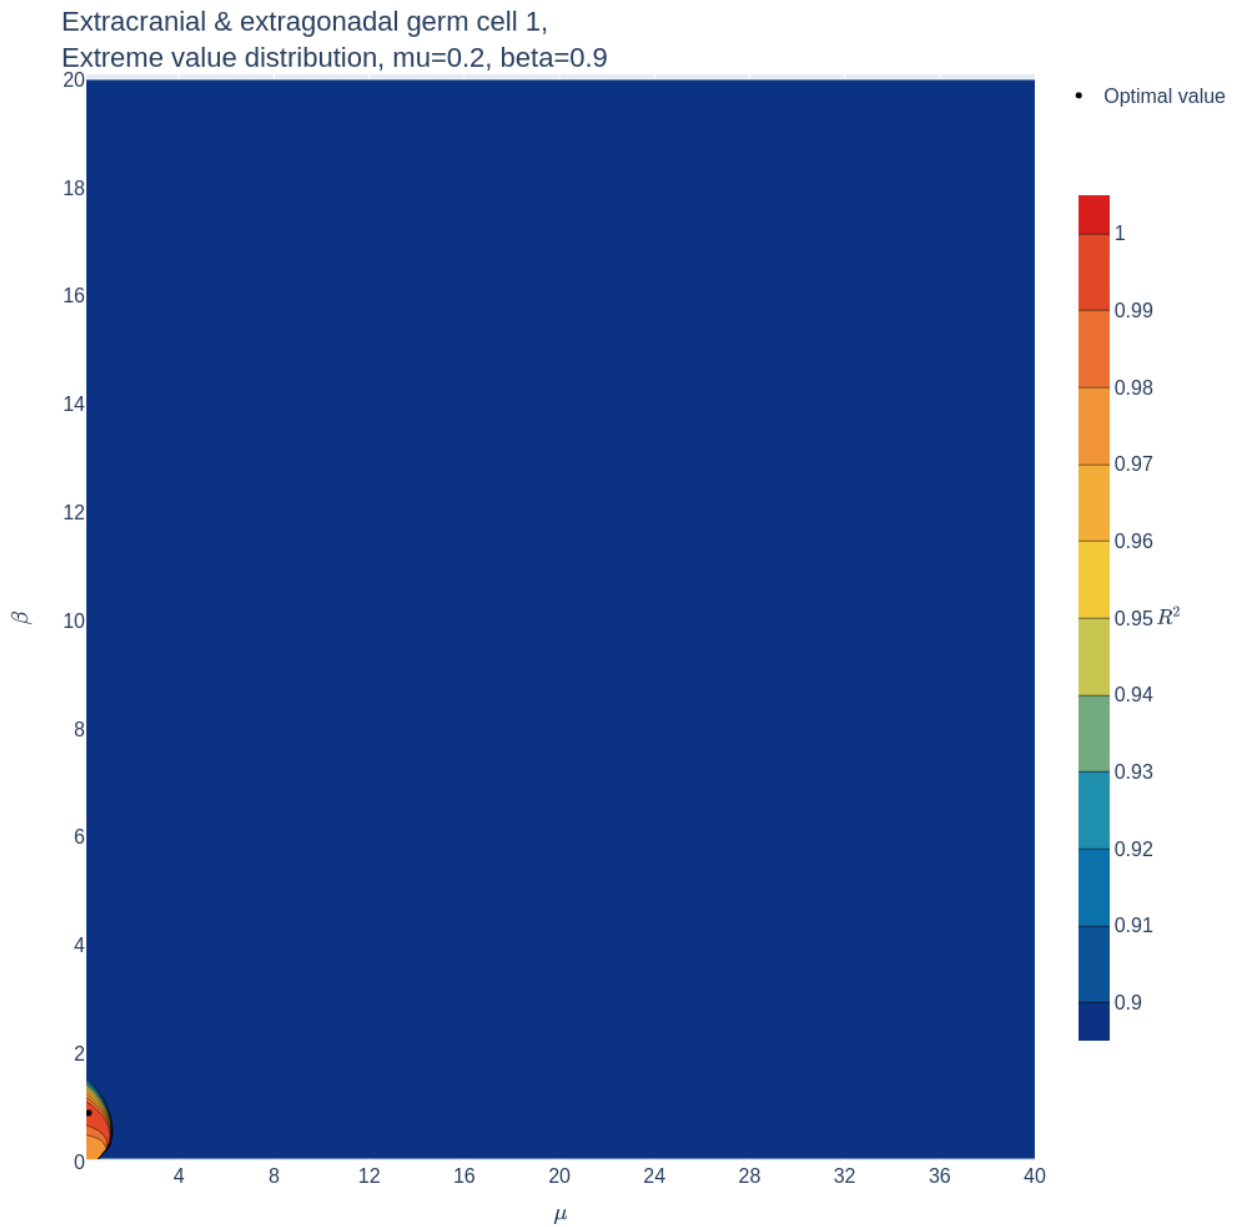

**Web Figure 12. Goodness of fit of the extreme value distribution to the age distribution of incidence of extracranial and extragonadal germ cell tumors of childhood as a function of various parameter combinations.**

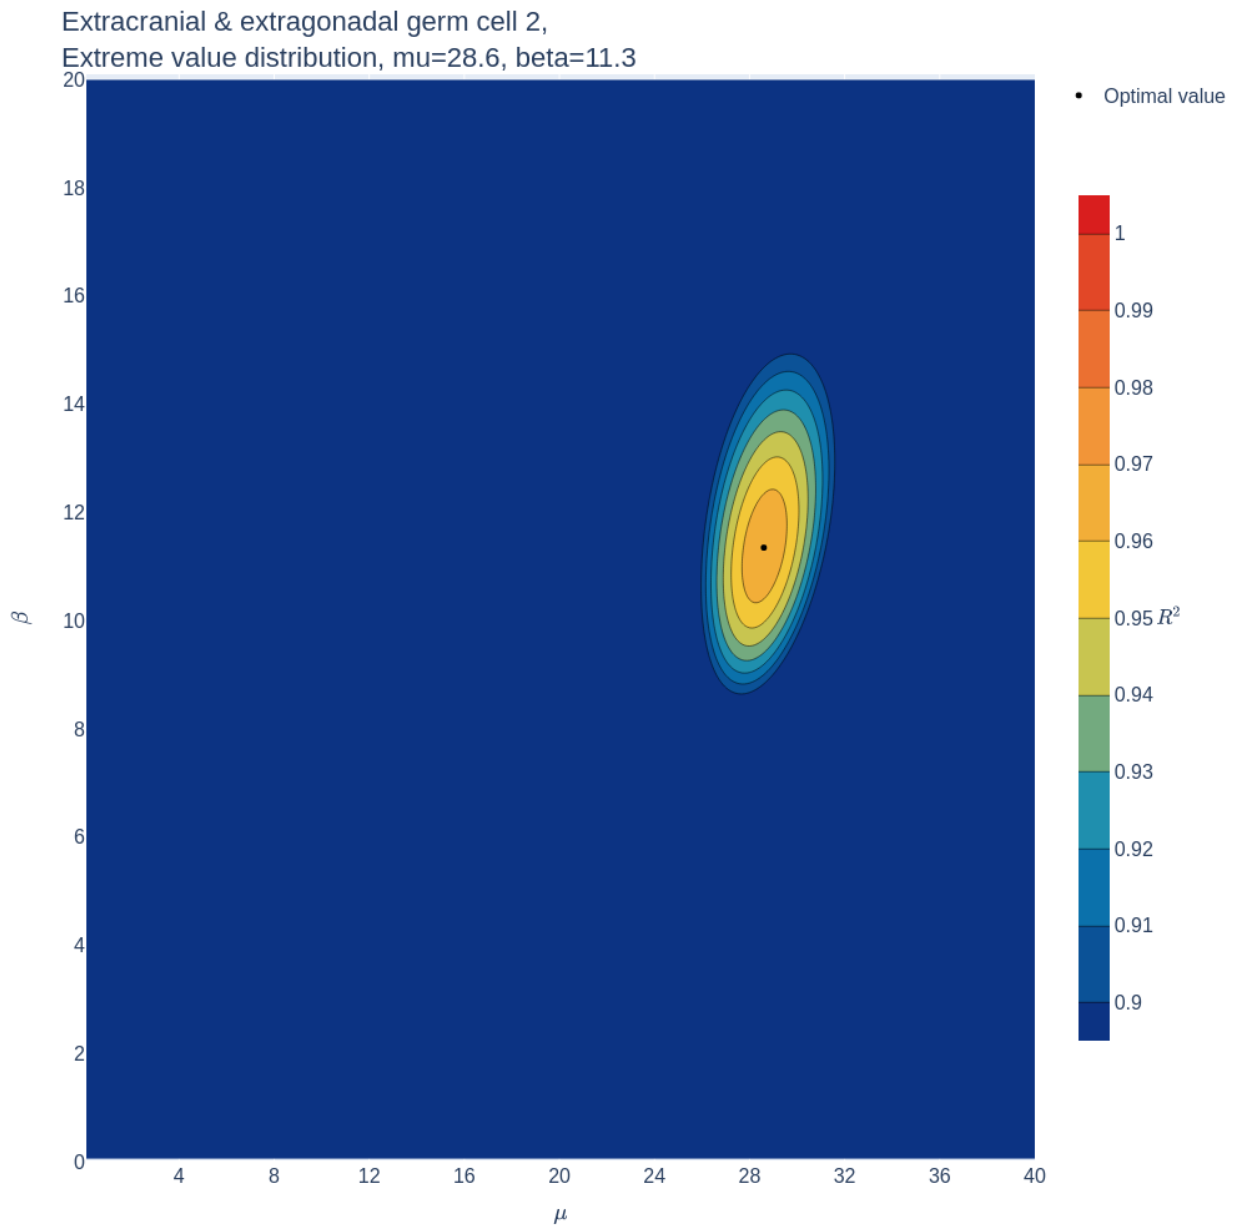

**Web Figure 13. Goodness of fit of the extreme value distribution to the age distribution of incidence of extracranial and extragonadal germ cell tumors of young adulthood as a function of various parameter combinations.**

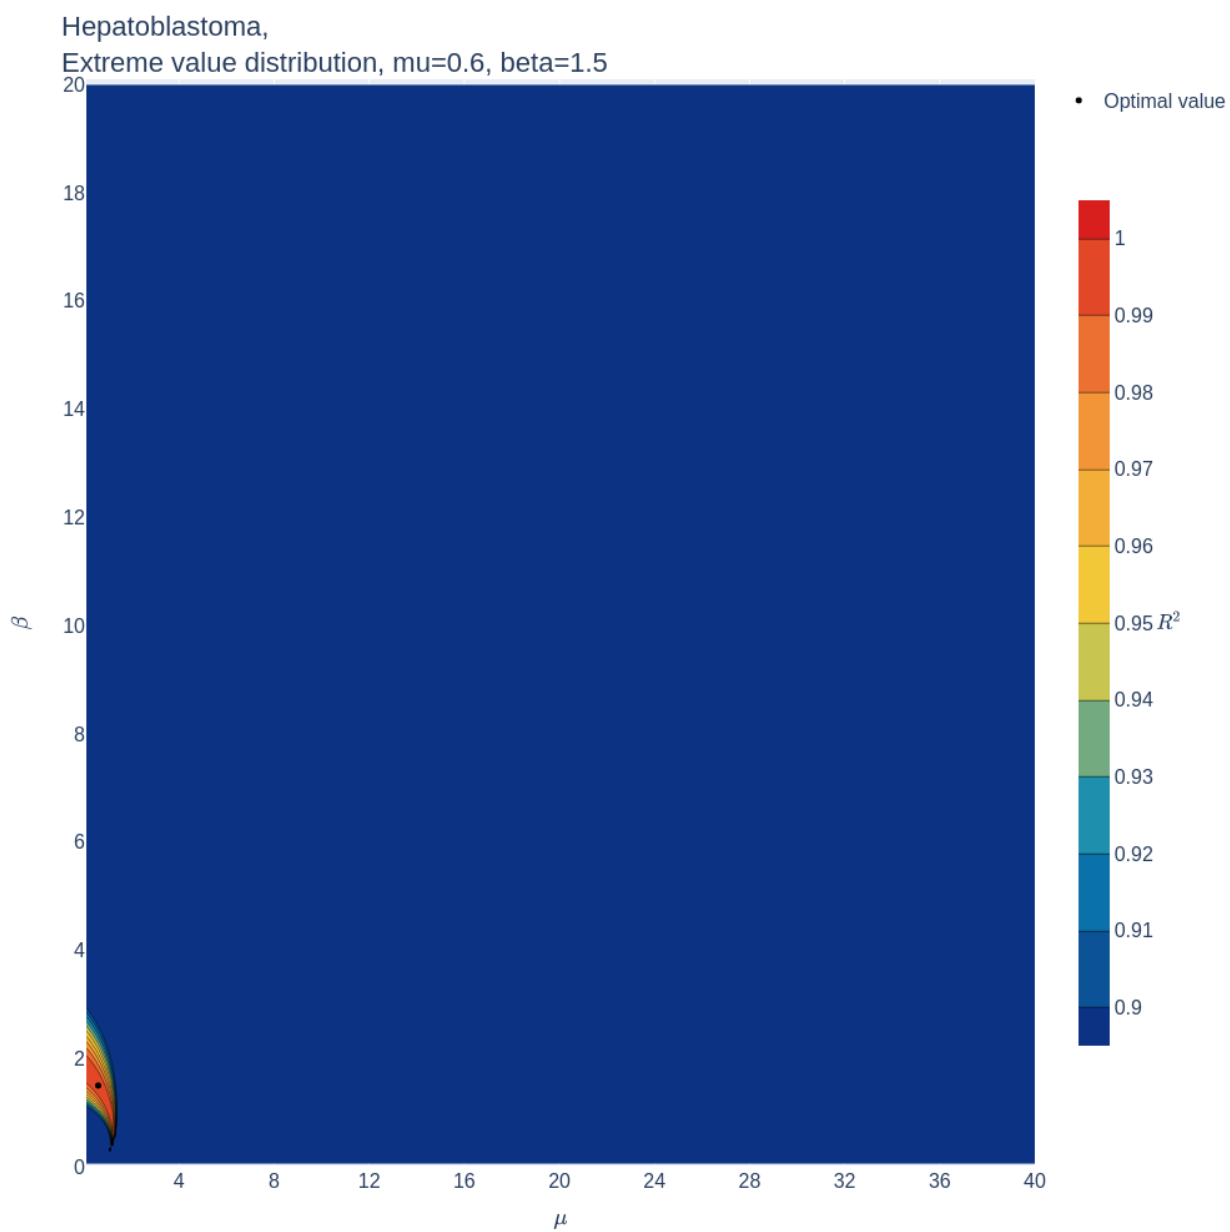

**Web Figure 14. Goodness of fit of the extreme value distribution to the age distribution of incidence of hepatoblastoma as a function of various parameter combinations.**

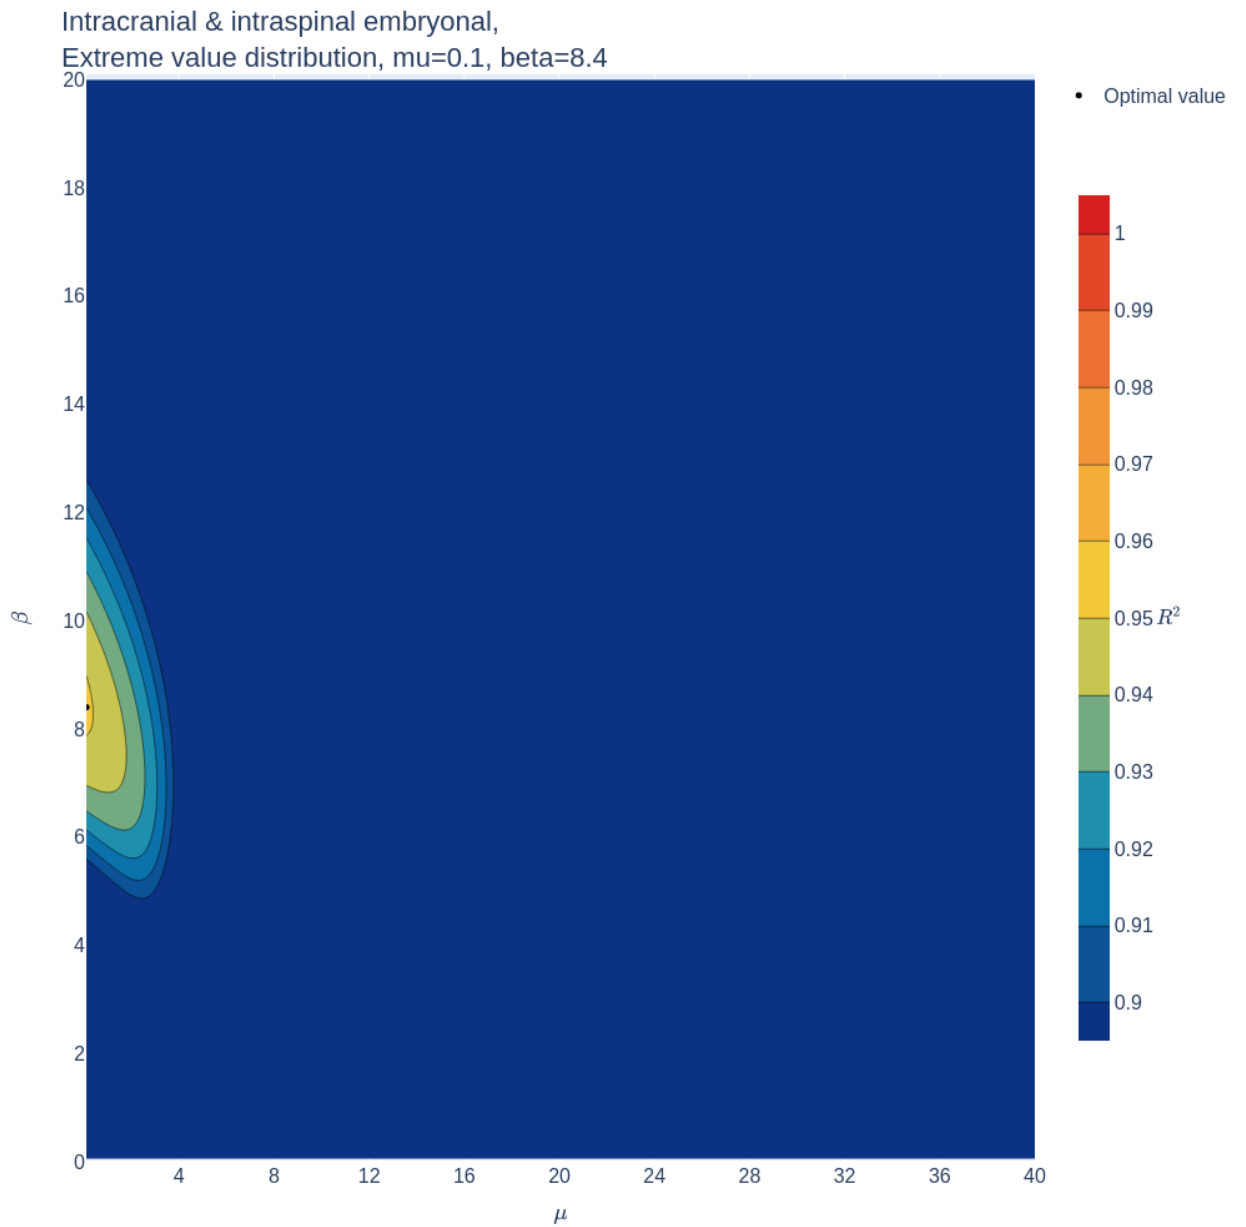

**Web Figure 15. Goodness of fit of the extreme value distribution to the age distribution of incidence of intracranial and intraspinal embryonal tumors as a function of various parameter combinations.**

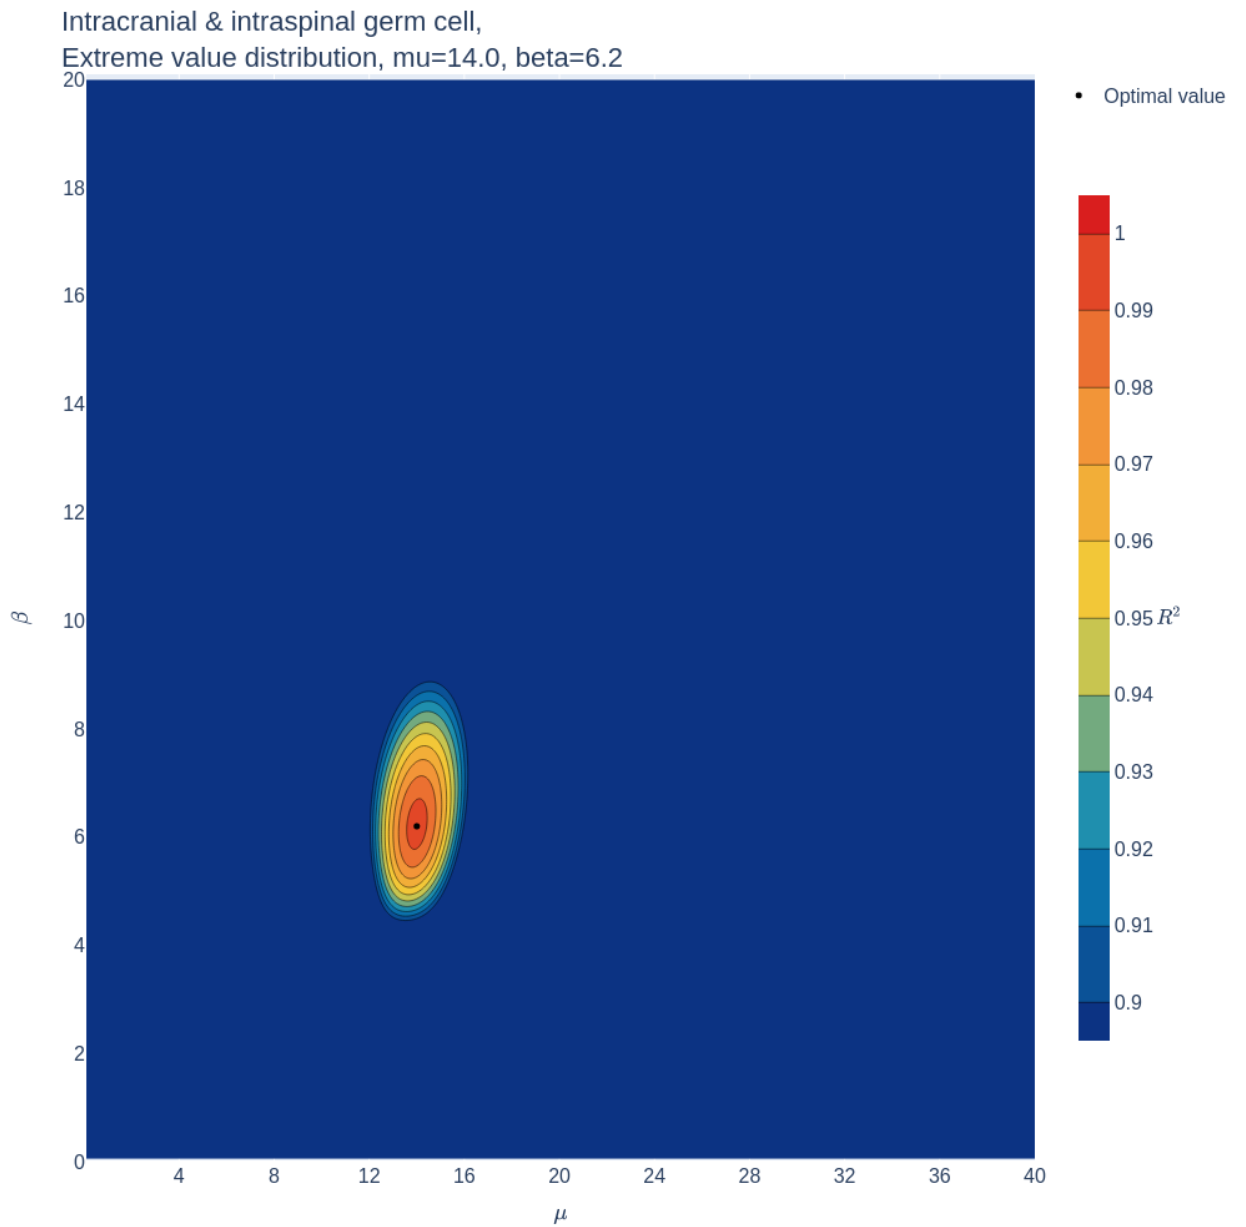

**Web Figure 16. Goodness of fit of the extreme value distribution to the age distribution of incidence of intracranial and intraspinal germ cell tumors as a function of various parameter combinations.**



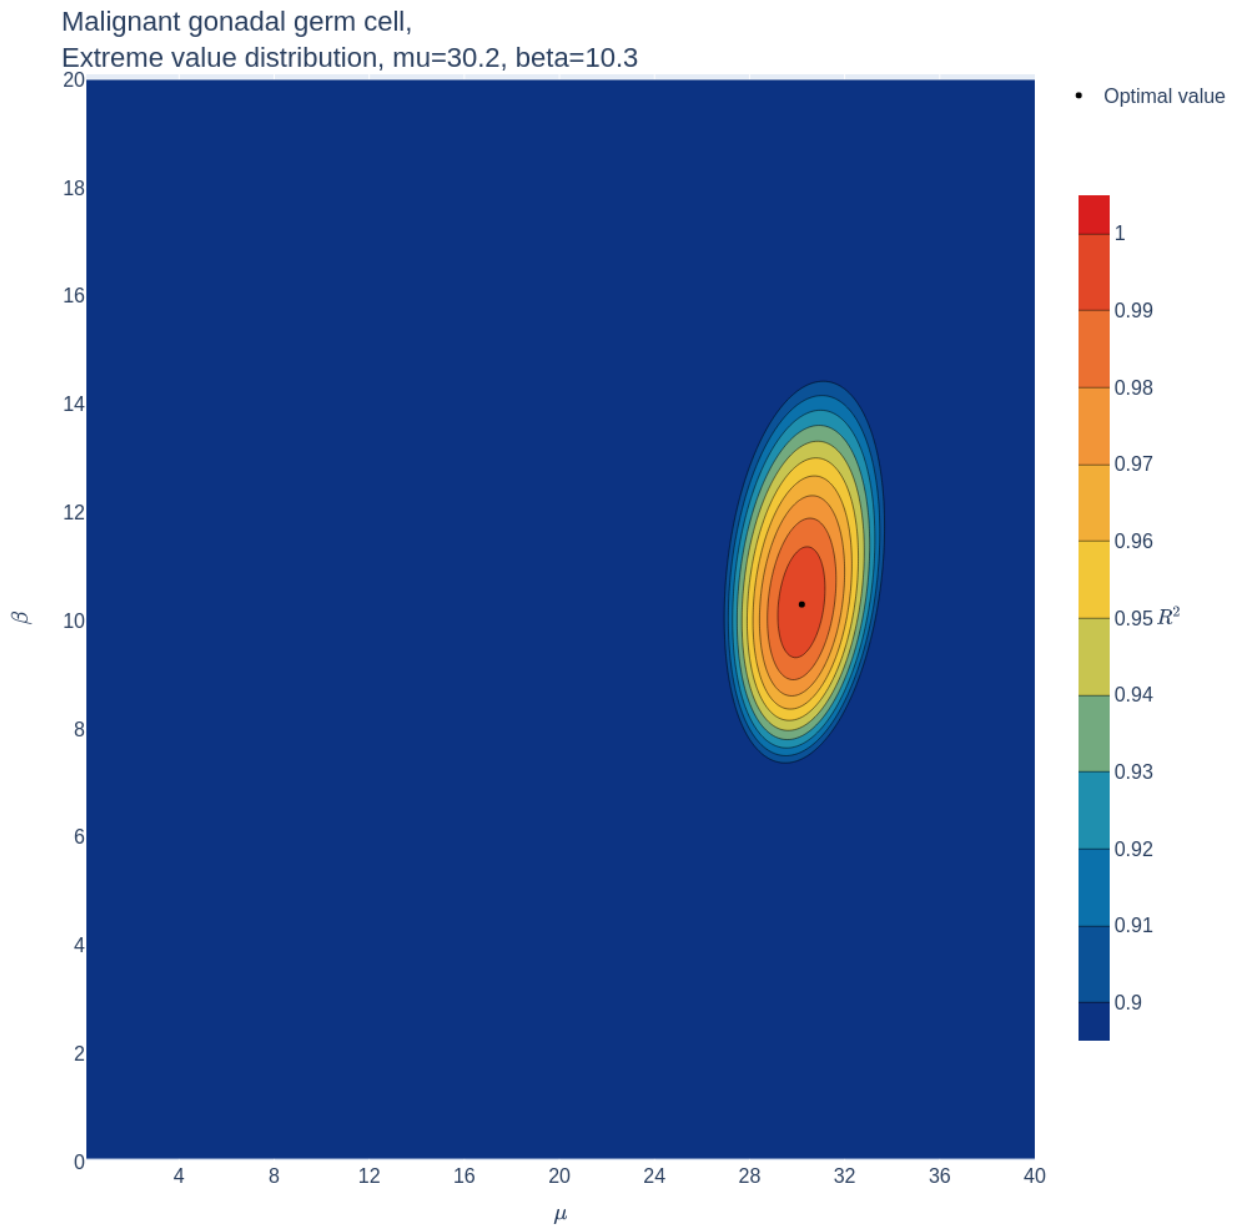

**Web Figure 17. Goodness of fit of the extreme value distribution to the age distribution of incidence of malignant gonadal germ cell tumors as a function of various parameter combinations.**

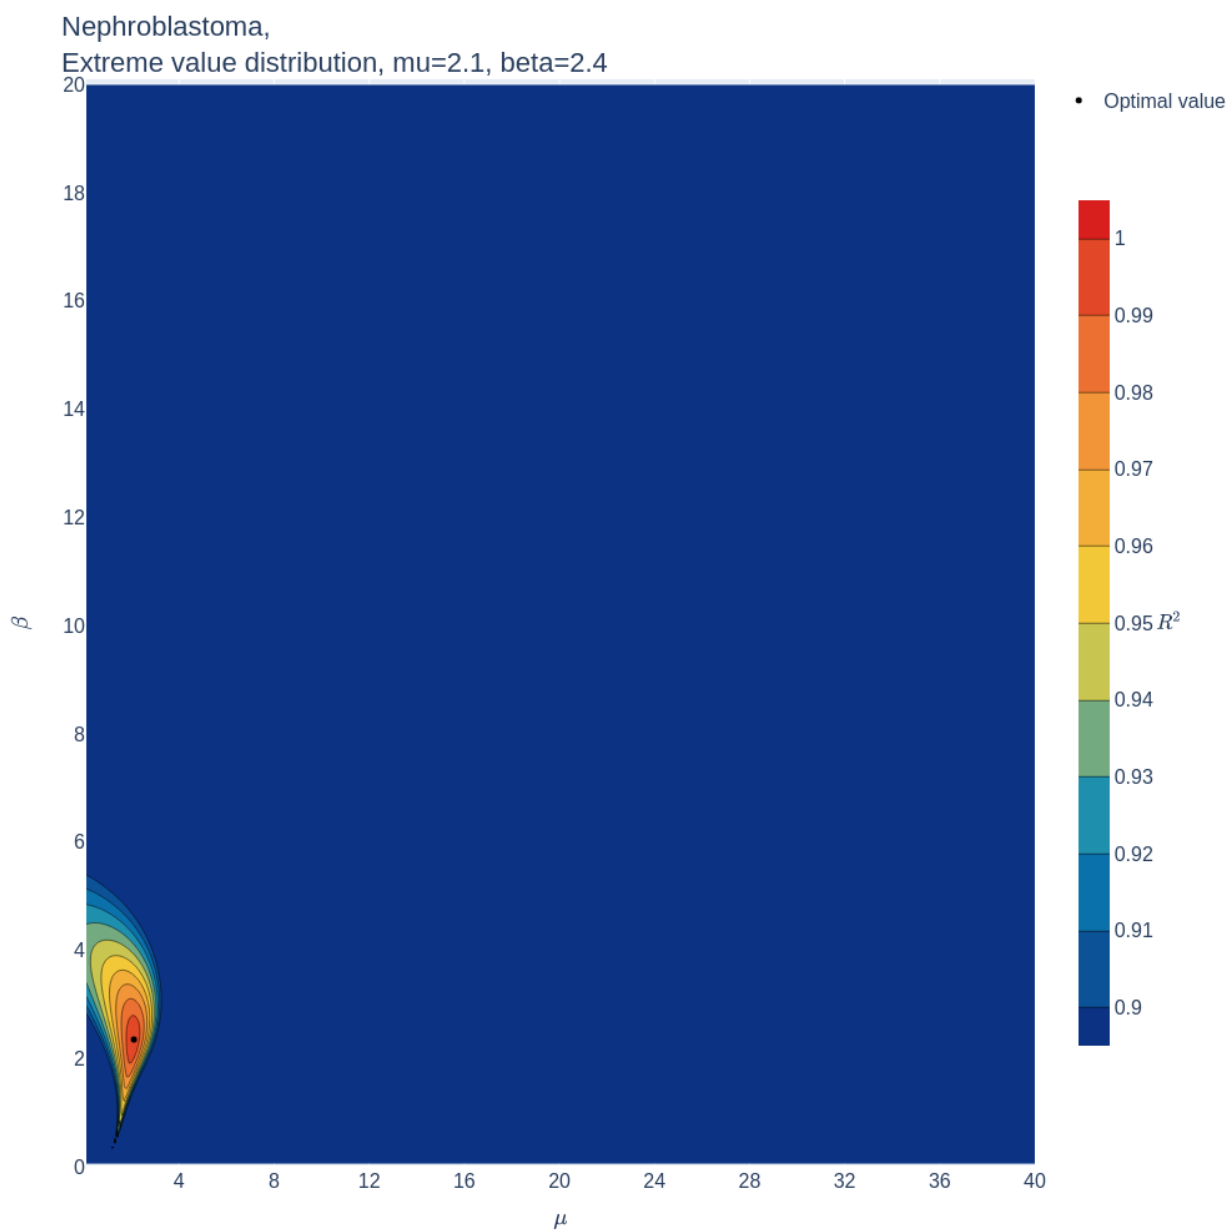

**Web Figure 18. Goodness of fit of the extreme value distribution to the age distribution of incidence of nephroblastoma as a function of various parameter combinations.**

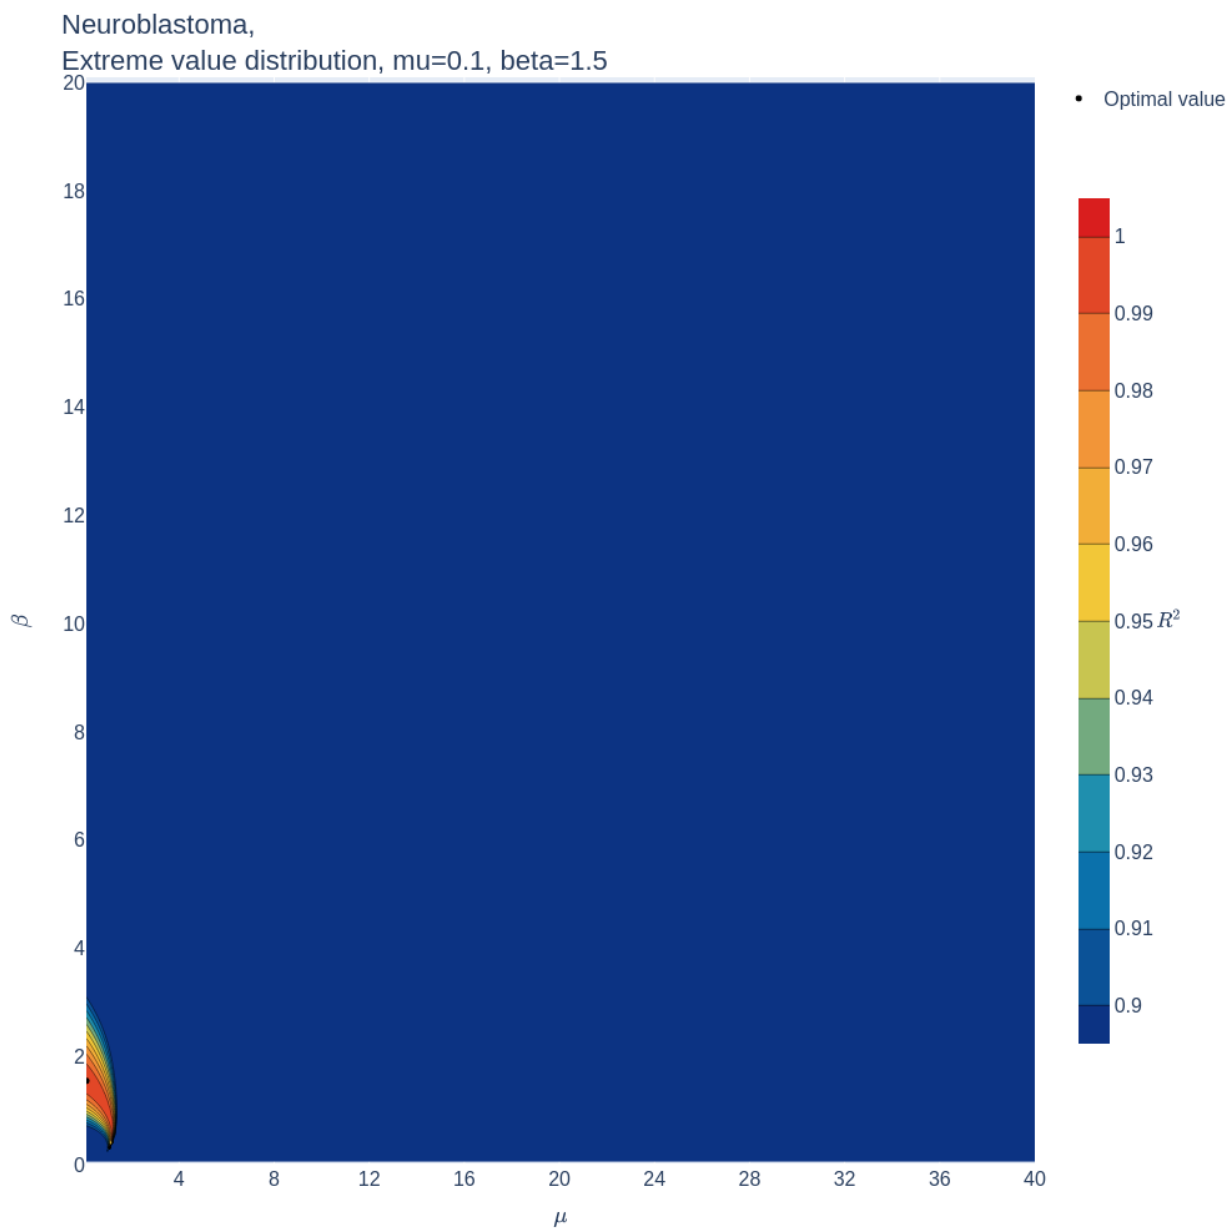

**Web Figure 19. Goodness of fit of the extreme value distribution to the age distribution of incidence of neuroblastoma as a function of various parameter combinations.**

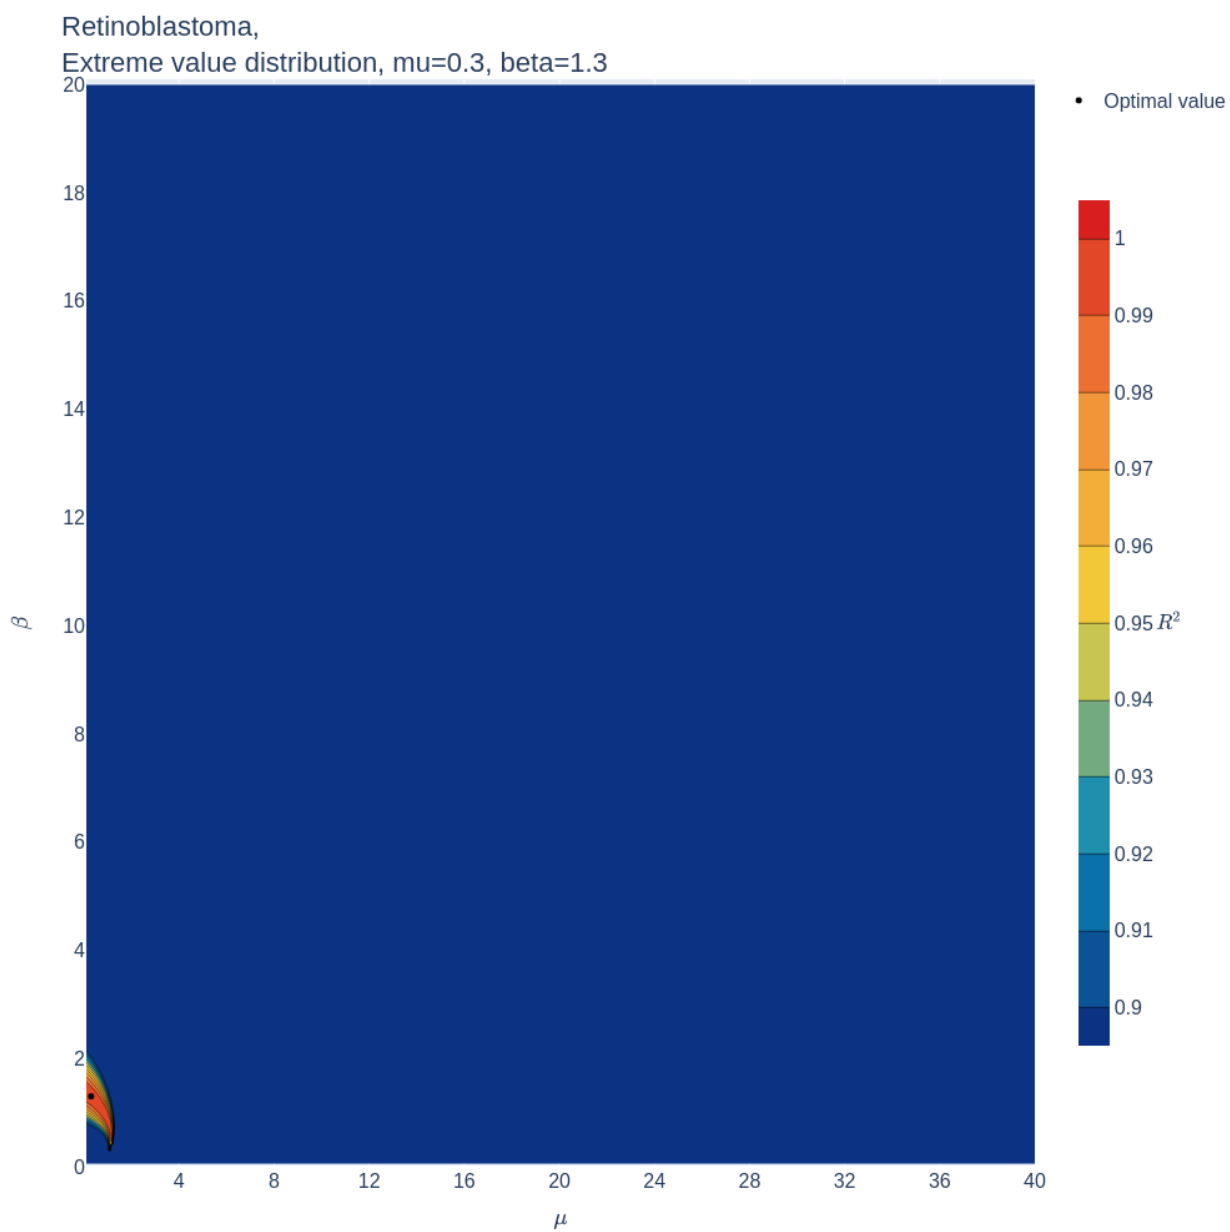

**Web Figure 20. Goodness of fit of the extreme value distribution to the age distribution of incidence of retinoblastoma as a function of various parameter combinations.**

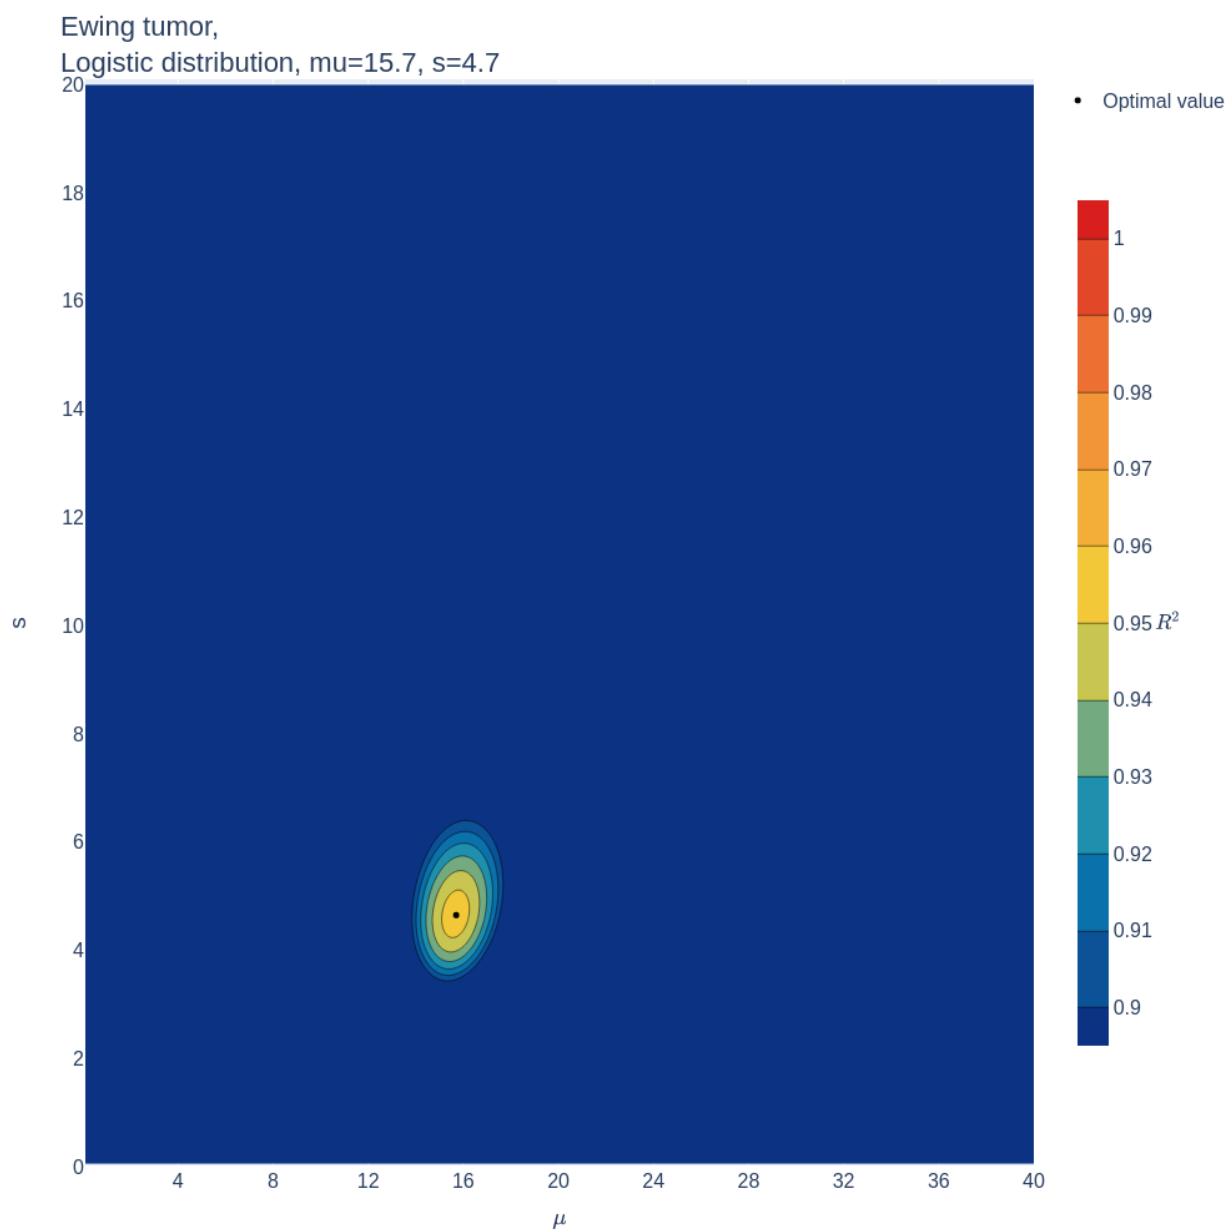

**Web Figure 21. Goodness of fit of the logistic distribution to the age distribution of incidence of Ewing tumor as a function of various parameter combinations.**

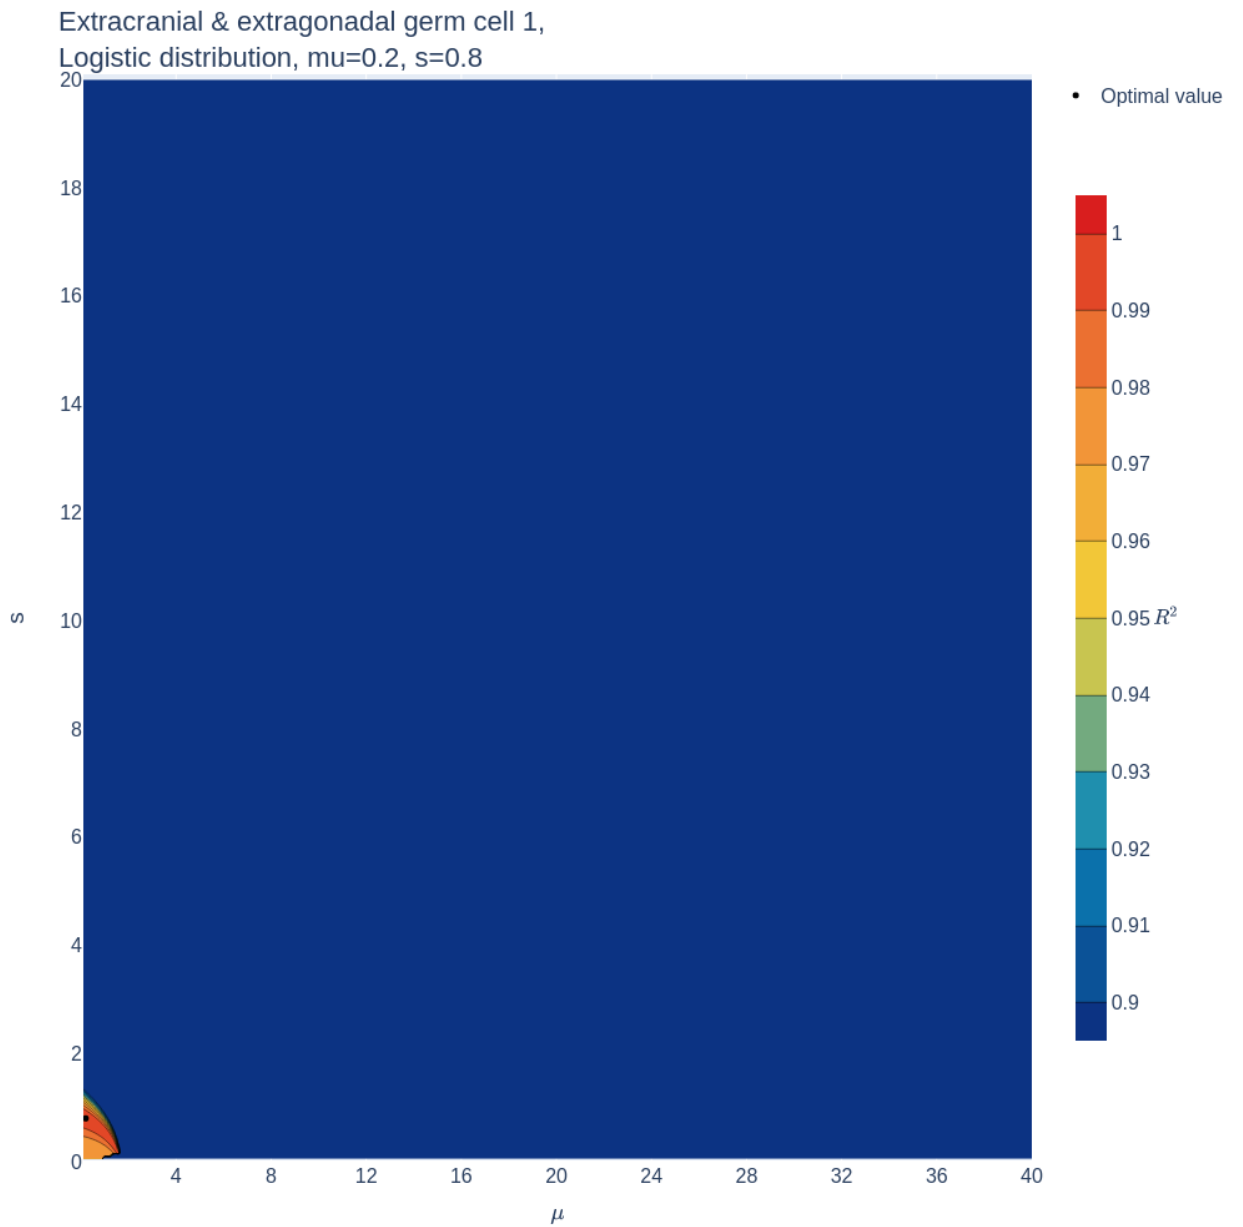

**Web Figure 22. Goodness of fit of the logistic distribution to the age distribution of incidence of extracranial and extragonadal germ cell tumors of childhood as a function of various parameter combinations.**

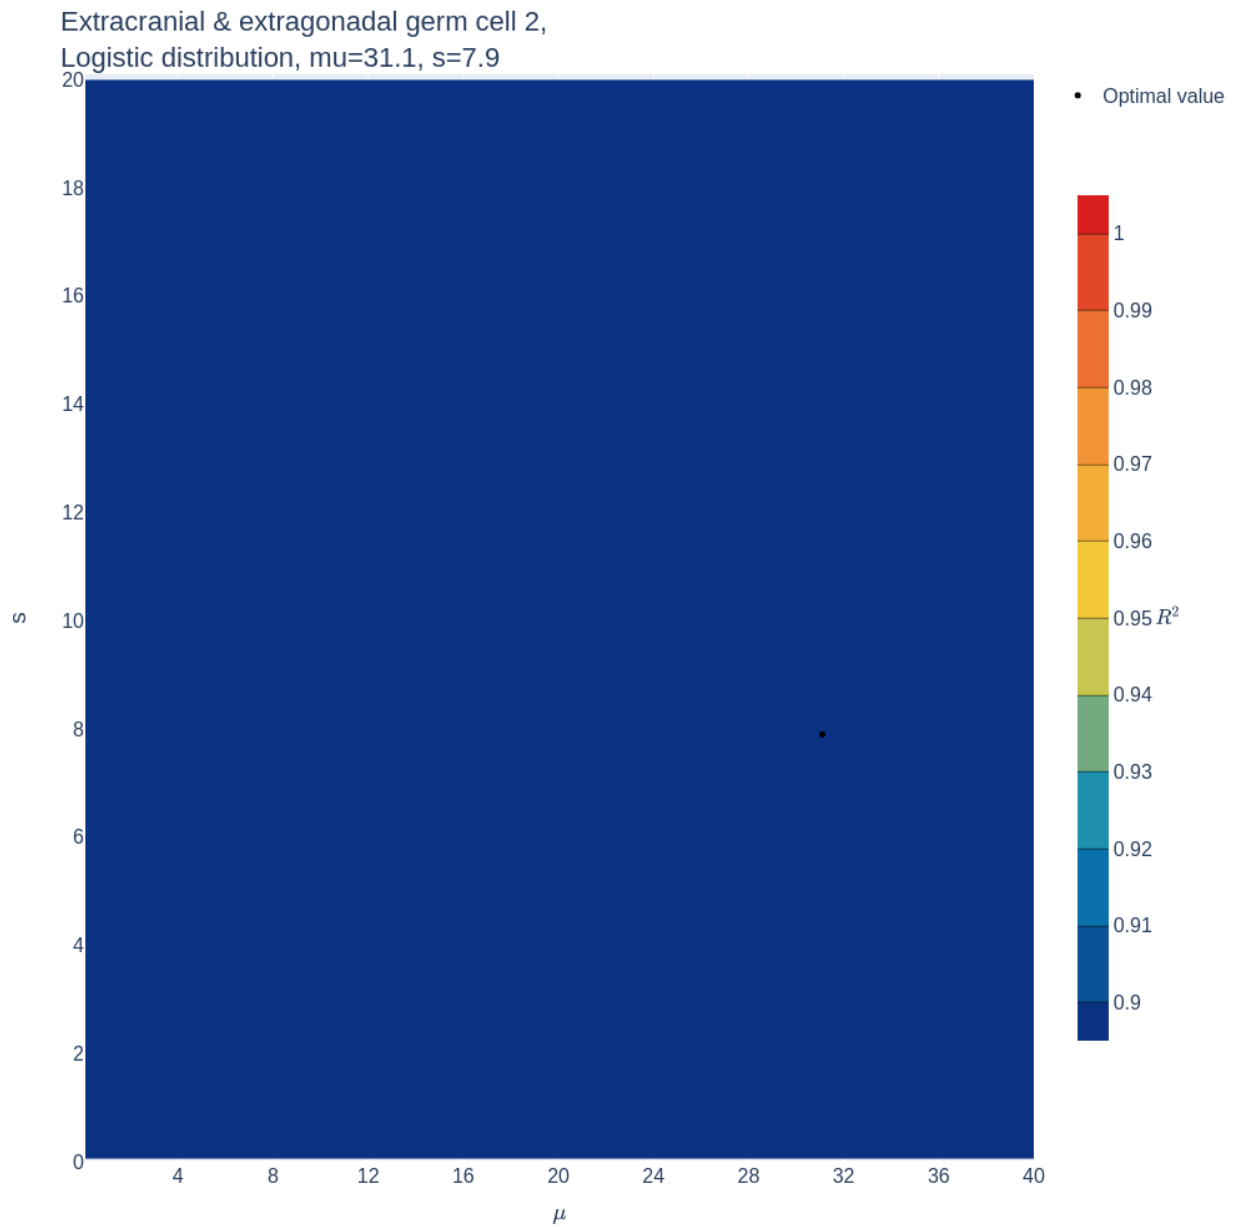

**Web Figure 23. Goodness of fit of the logistic distribution to the age distribution of incidence of extracranial and extragonadal germ cell tumors of young adulthood as a function of various parameter combinations.**

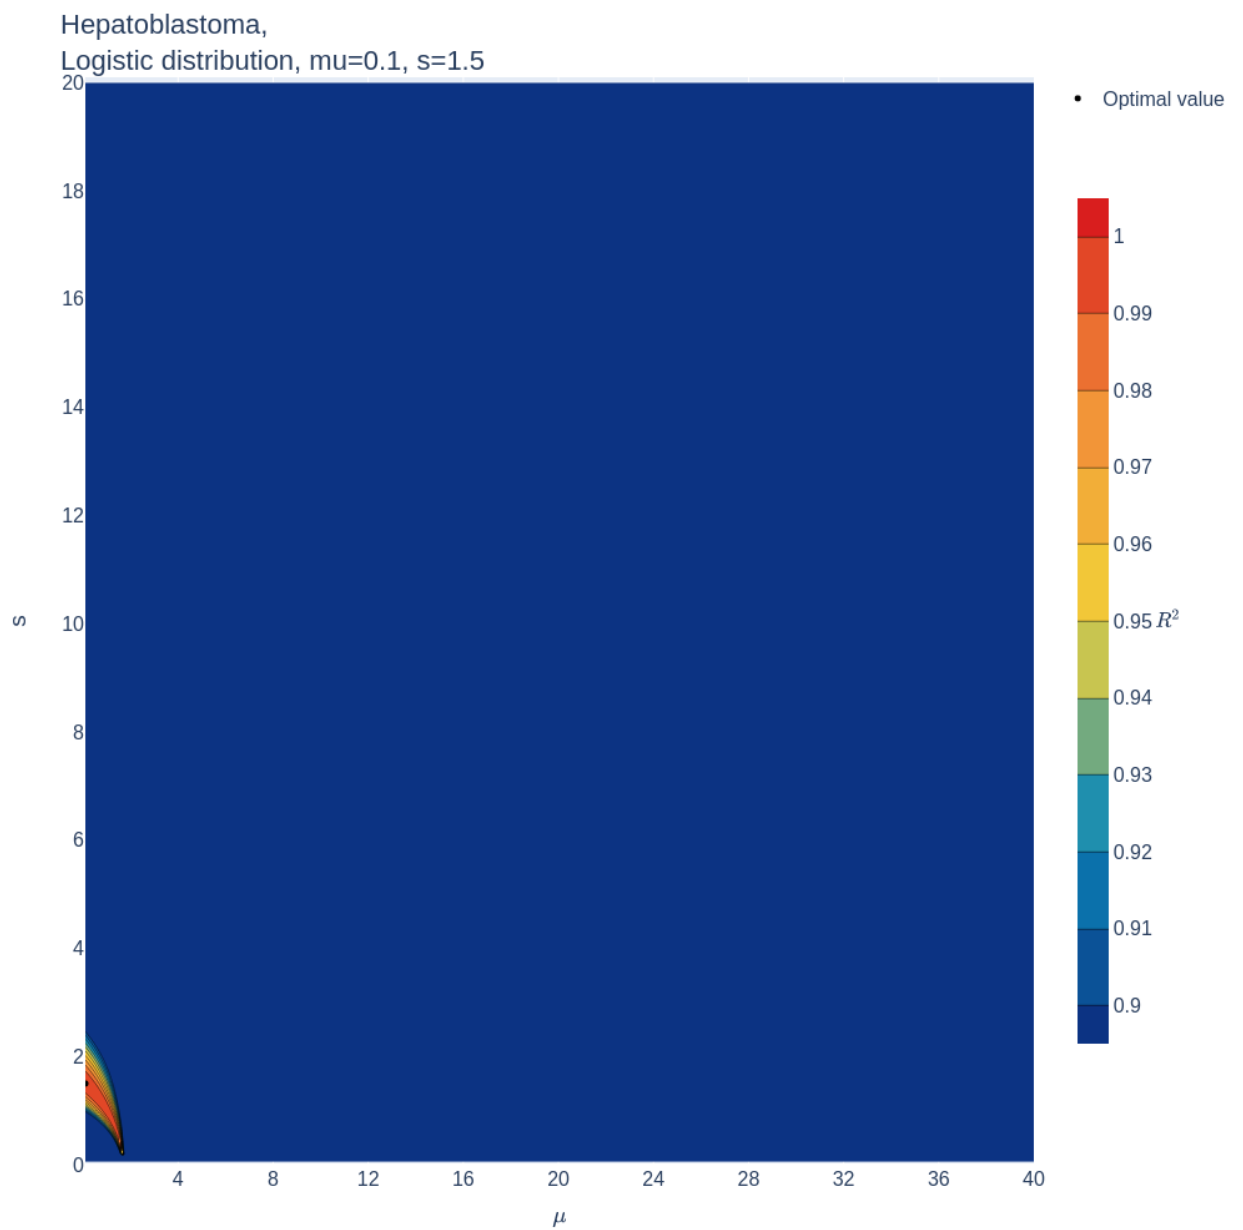

**Web Figure 24. Goodness of fit of the logistic distribution to the age distribution of incidence of hepatoblastoma as a function of various parameter combinations.**



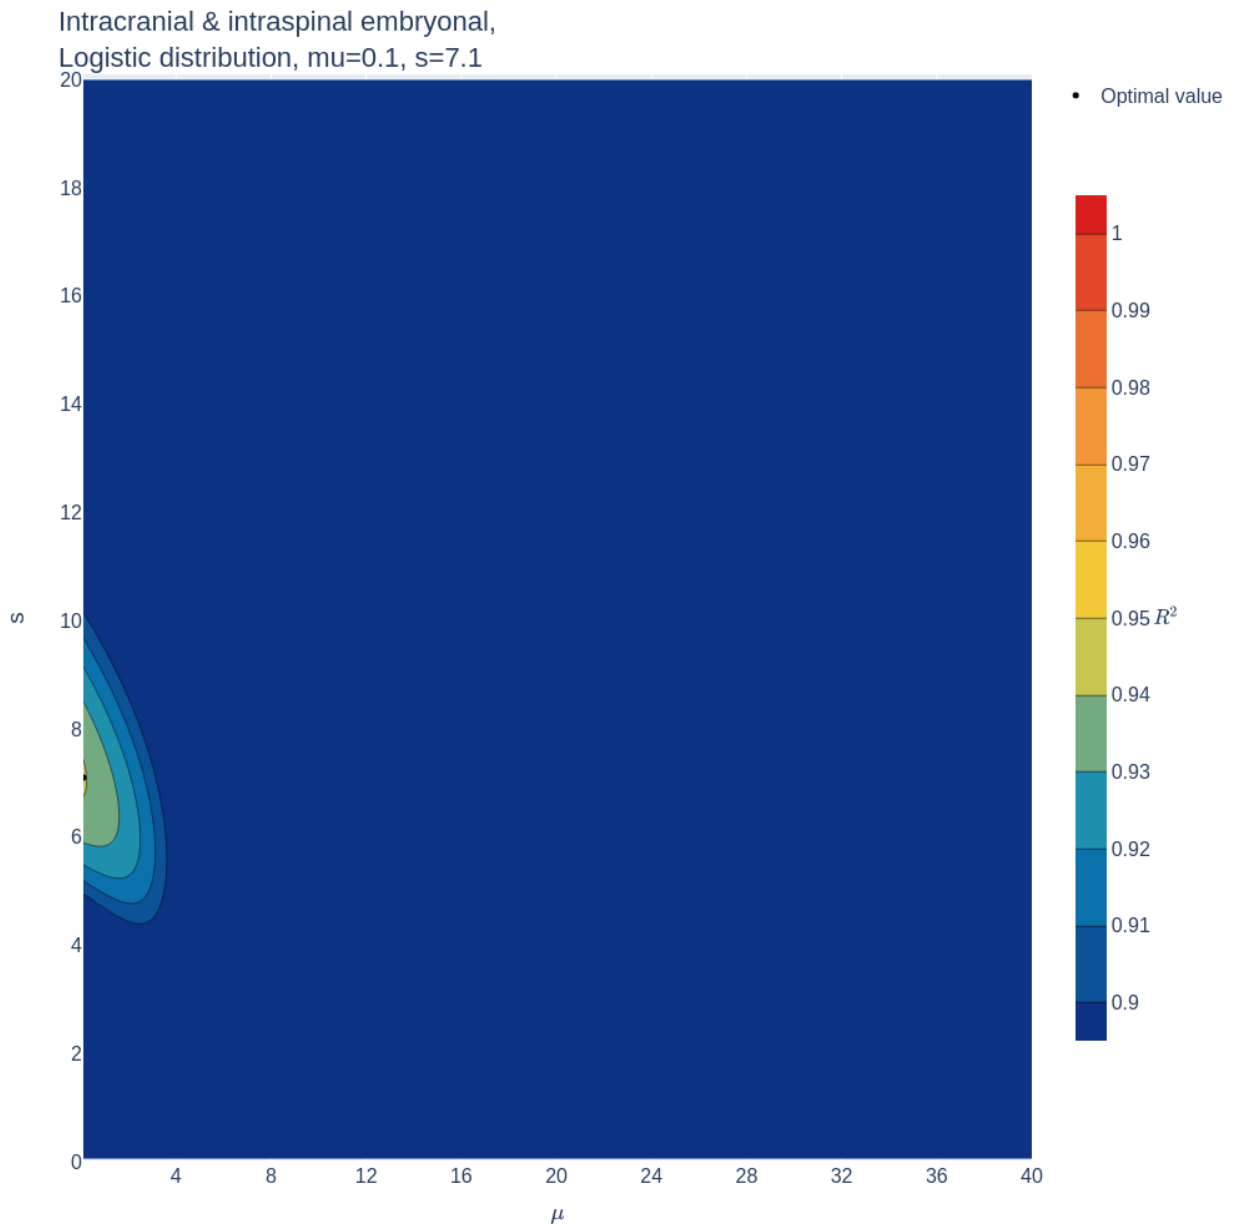

**Web Figure 25. Goodness of fit of the logistic distribution to the age distribution of incidence of intracranial and intraspinal embryonal tumors as a function of various parameter combinations.**

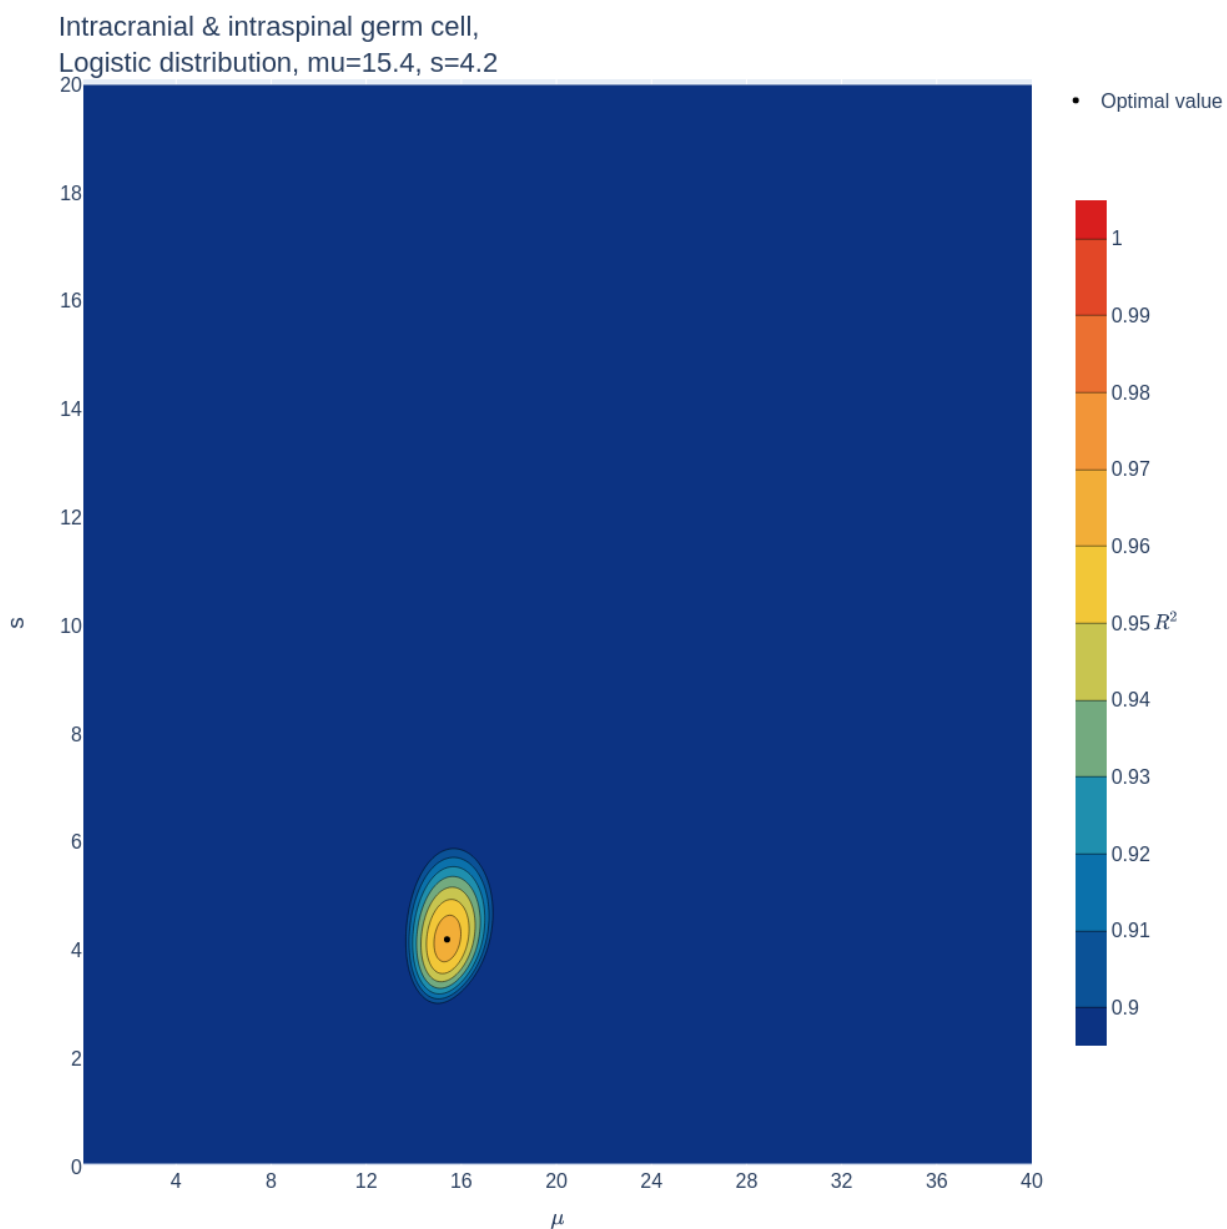

**Web Figure 26. Goodness of fit of the logistic distribution to the age distribution of incidence of intracranial and intraspinal germ cell tumors as a function of various parameter combinations.**

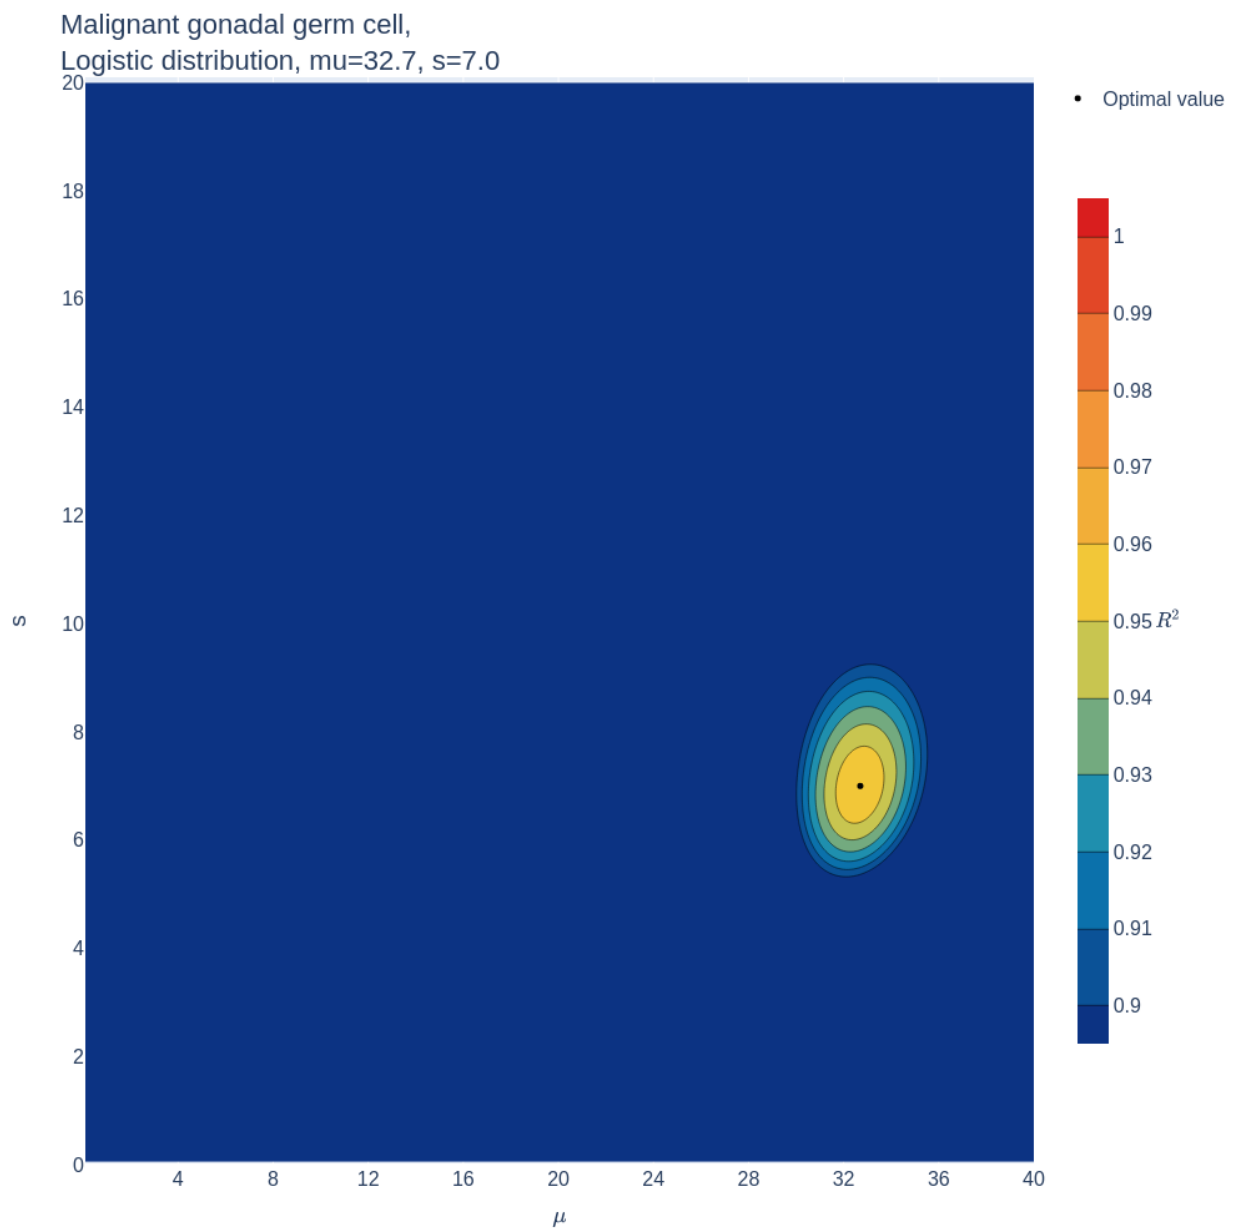

**Web Figure 27. Goodness of fit of the logistic distribution to the age distribution of incidence of malignant gonadal germ cell tumors as a function of various parameter combinations.**

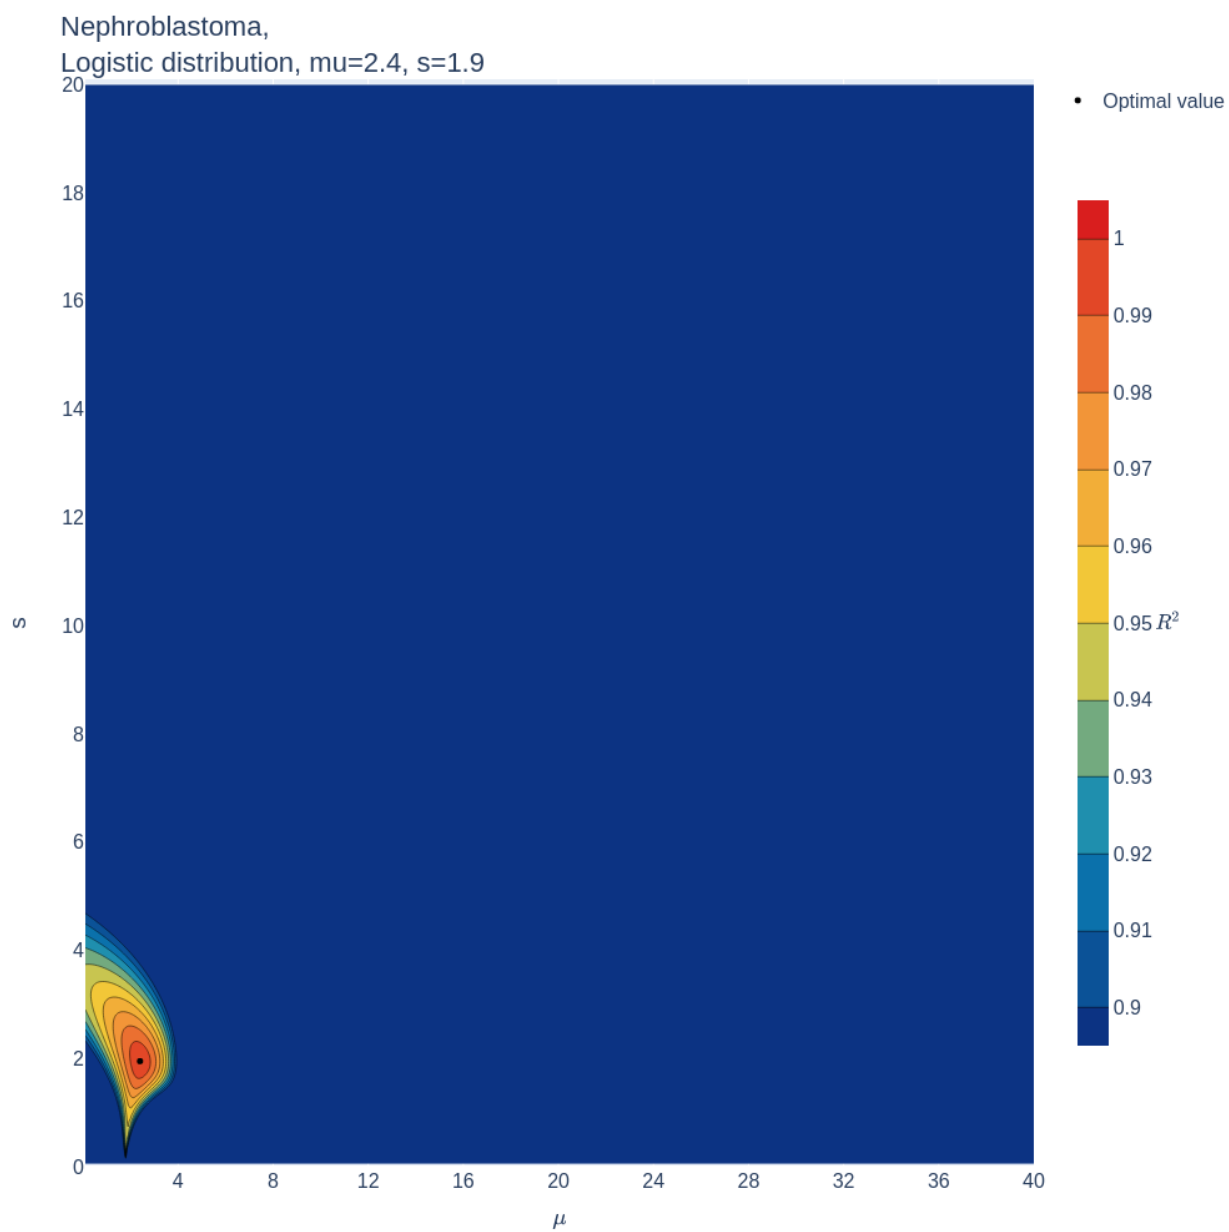

**Web Figure 28. Goodness of fit of the logistic distribution to the age distribution of incidence of nephroblastoma as a function of various parameter combinations.**

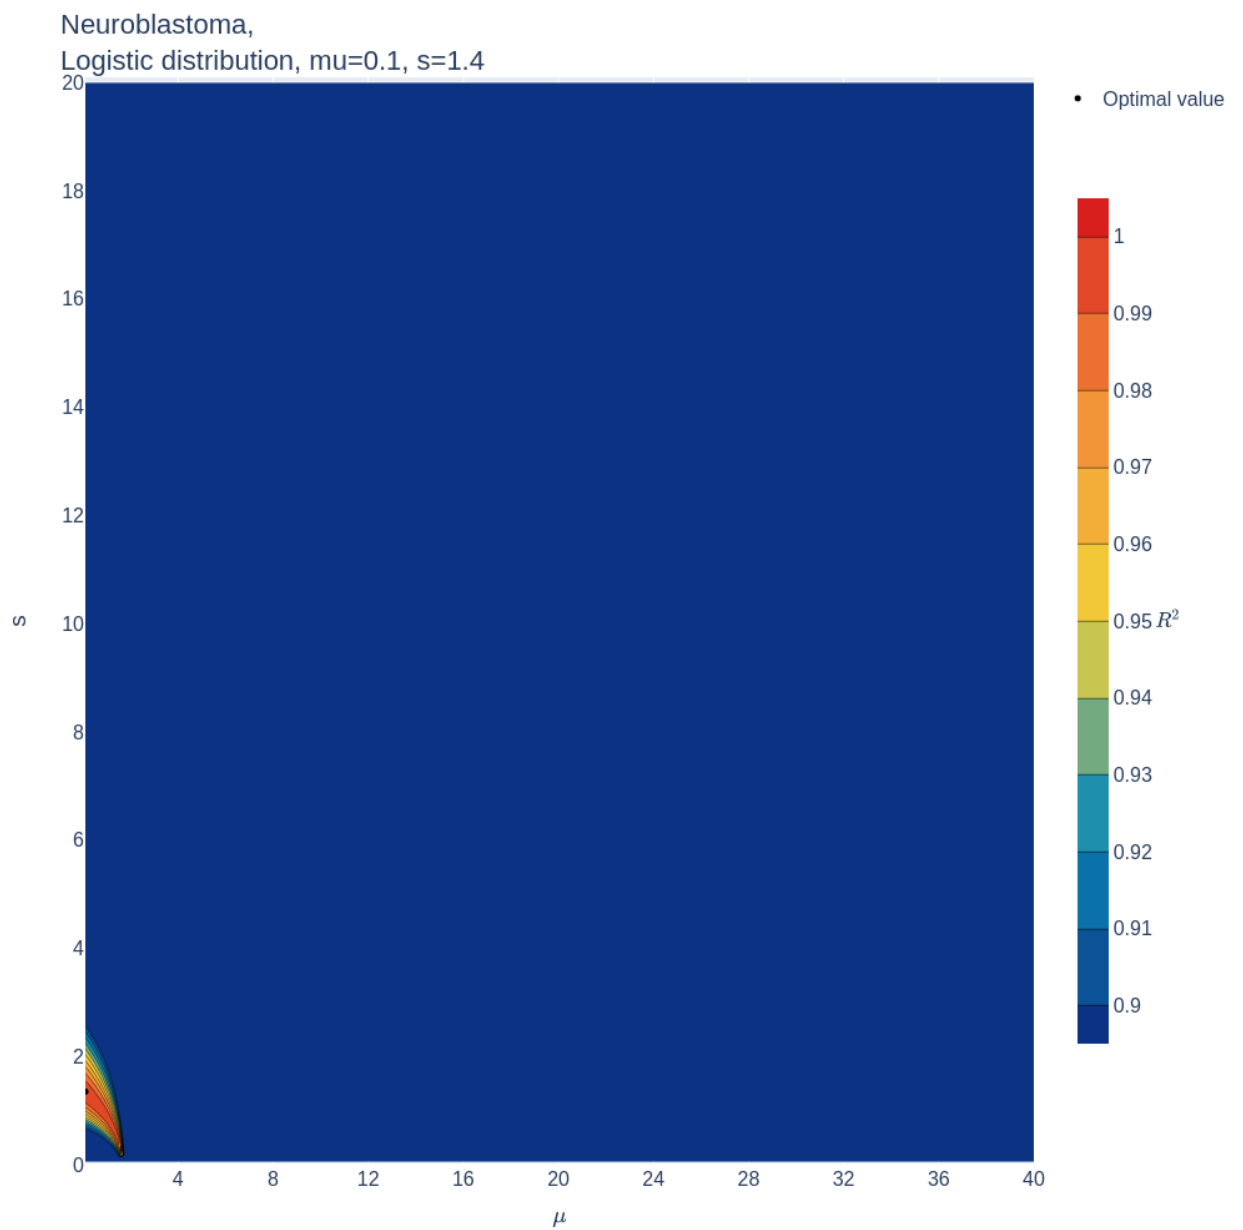

**Web Figure 29. Goodness of fit of the logistic distribution to the age distribution of incidence of neuroblastoma as a function of various parameter combinations.**

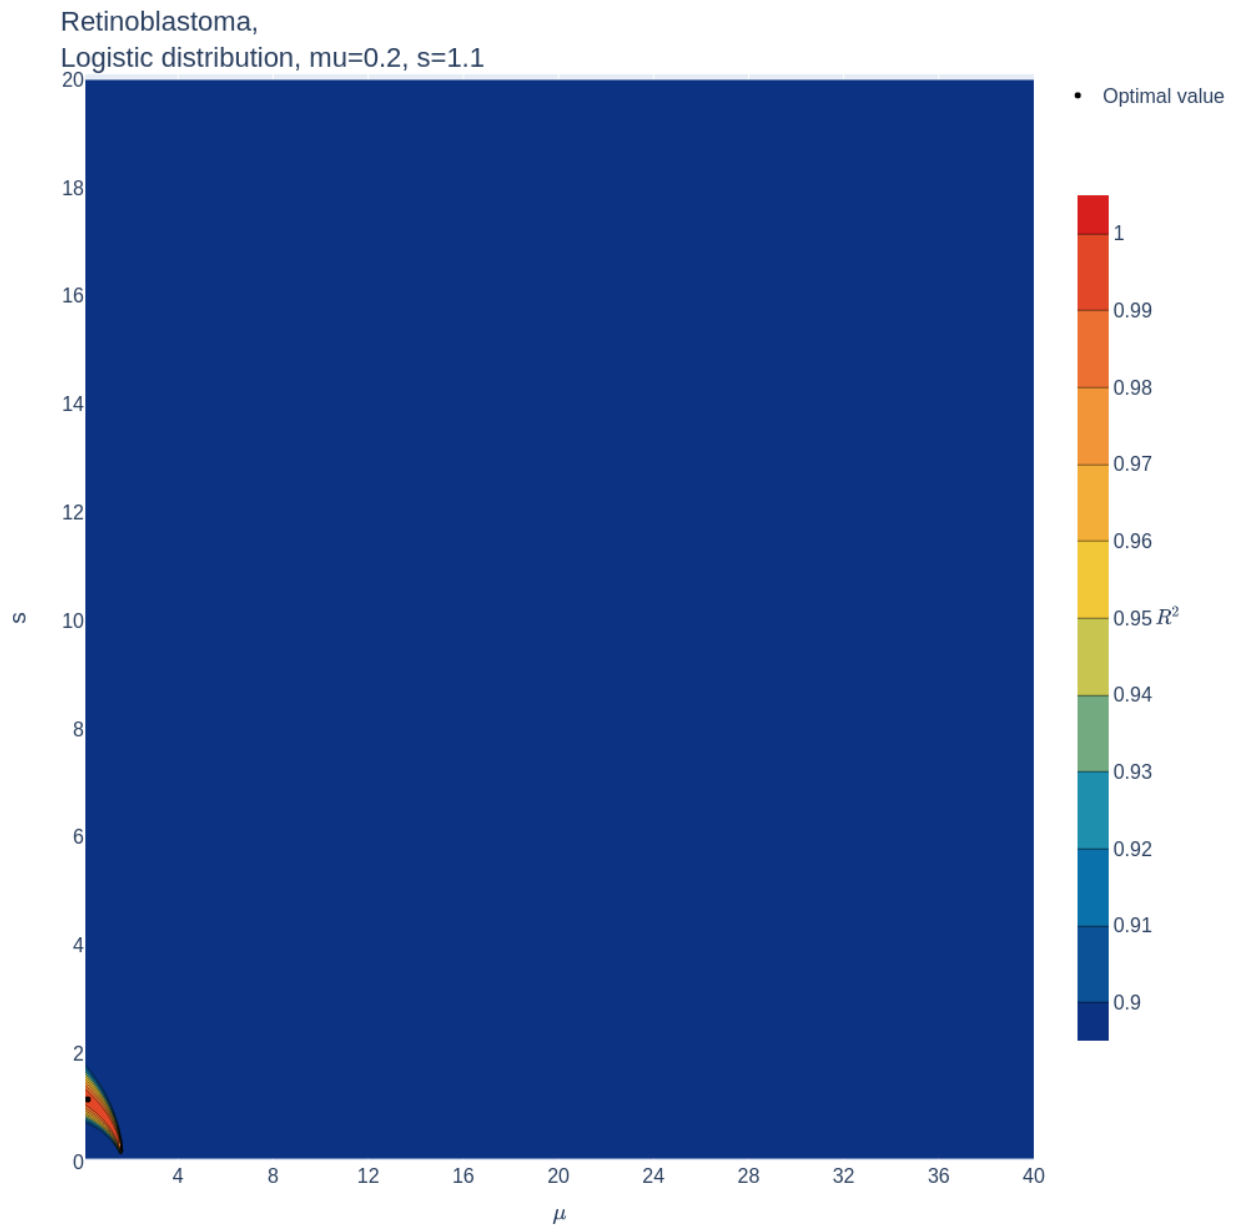

**Web Figure 30. Goodness of fit of the logistic distribution to the age distribution of incidence of retinoblastoma as a function of various parameter combinations.**

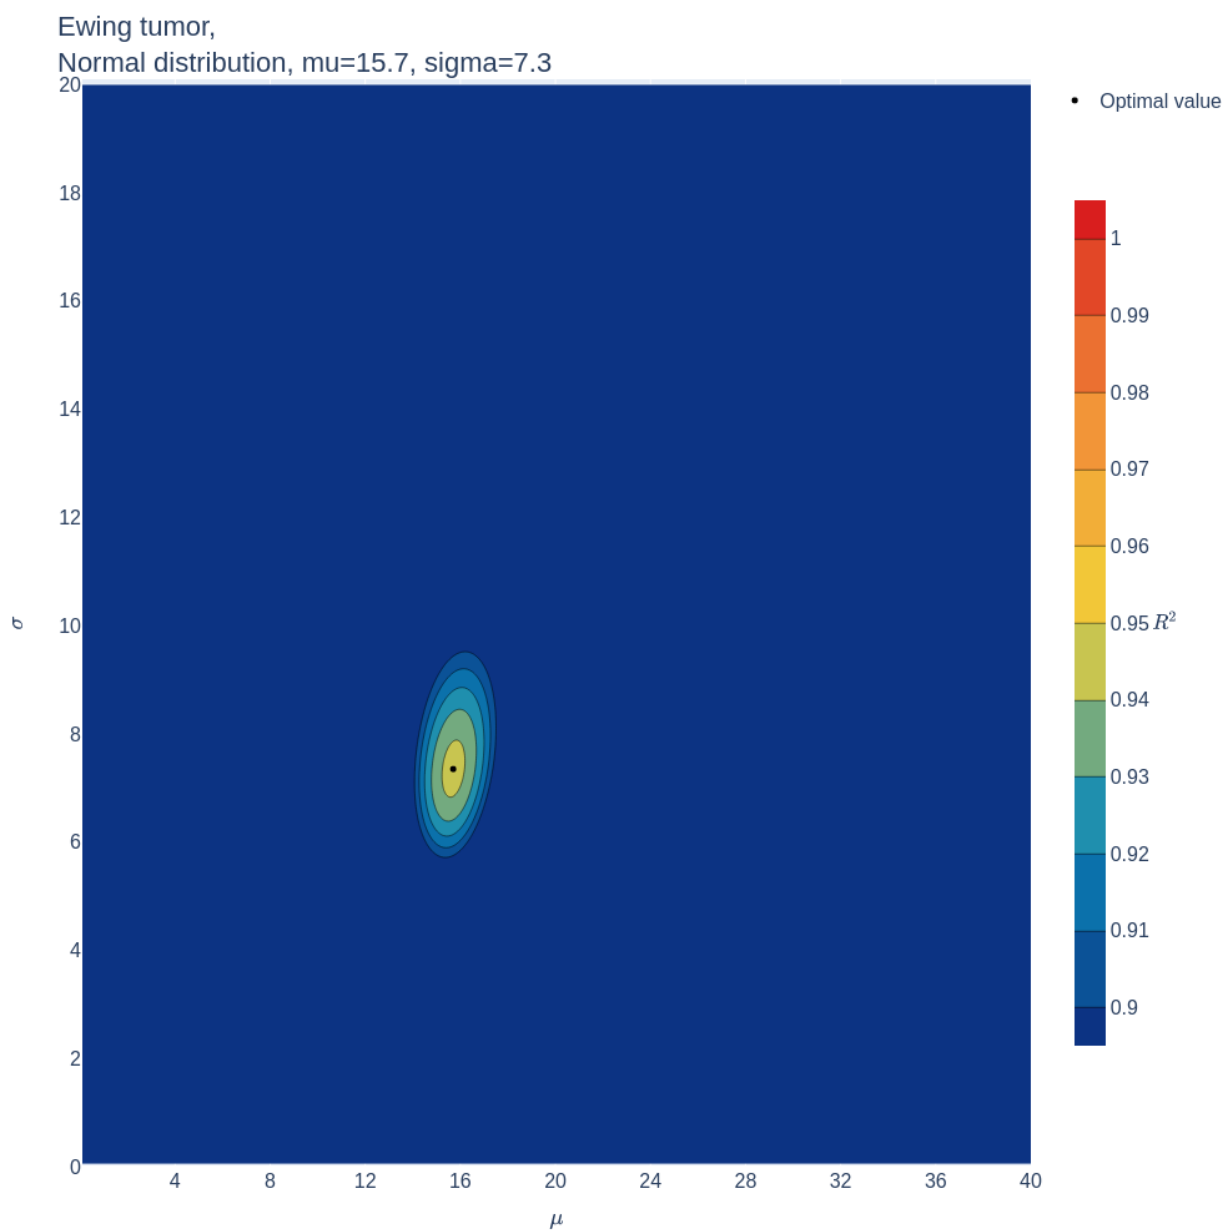

**Web Figure 31. Goodness of fit of the normal distribution to the age distribution of incidence of Ewing tumor as a function of various parameter combinations.**

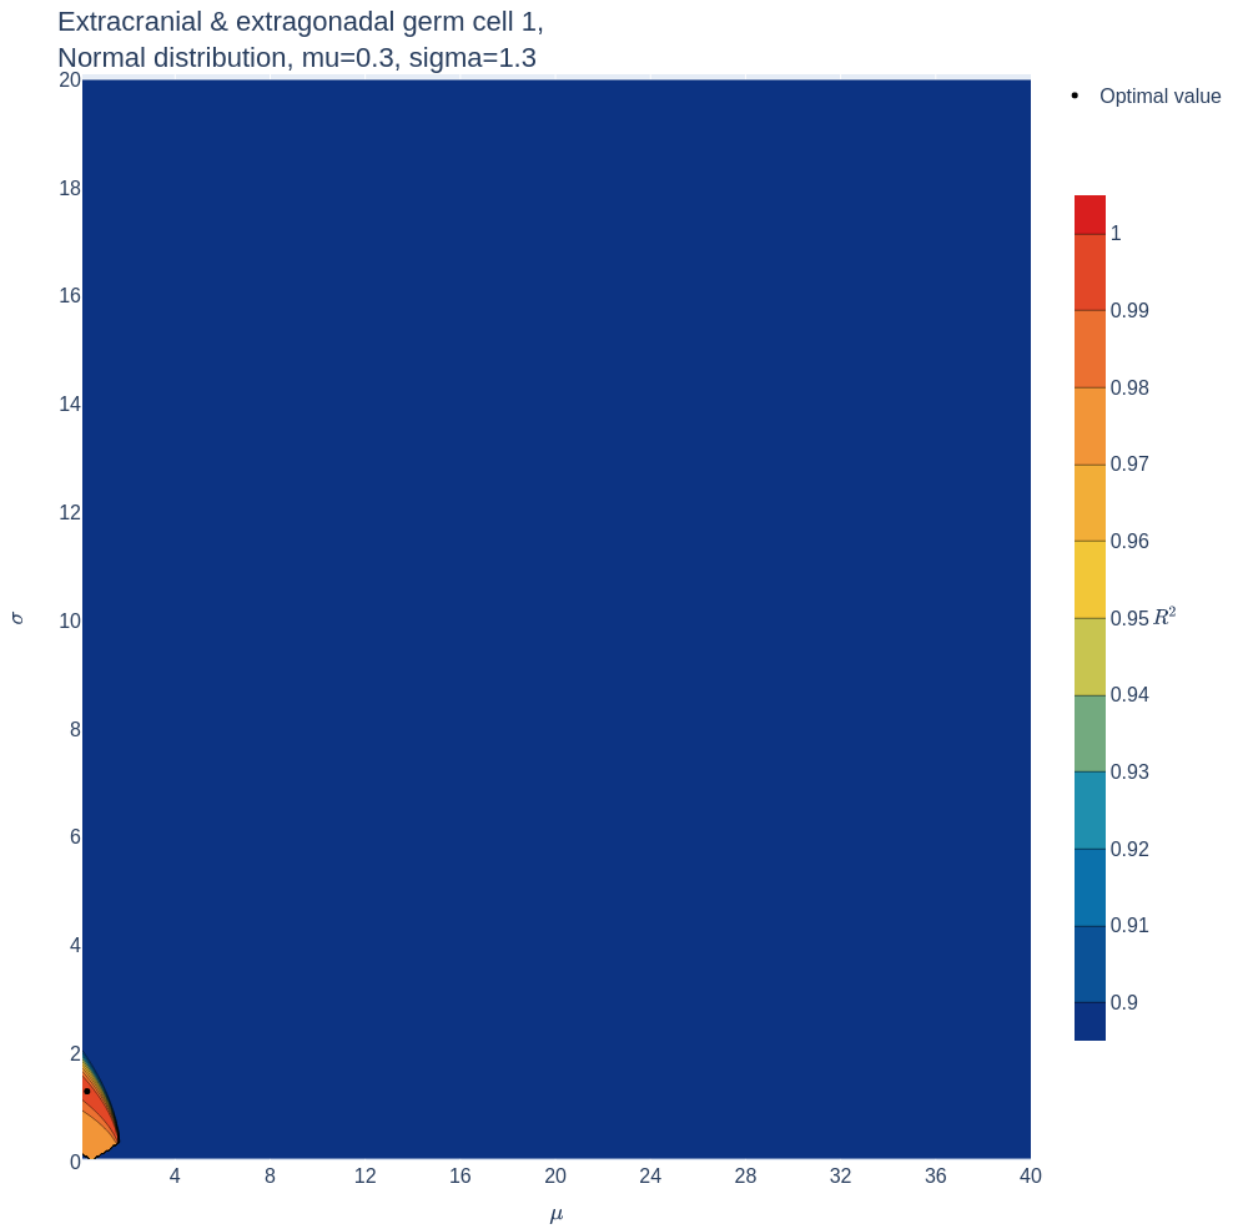

**Web Figure 32. Goodness of fit of the normal distribution to the age distribution of incidence of extracranial and extragonadal germ cell tumors of childhood as a function of various parameter combinations.**



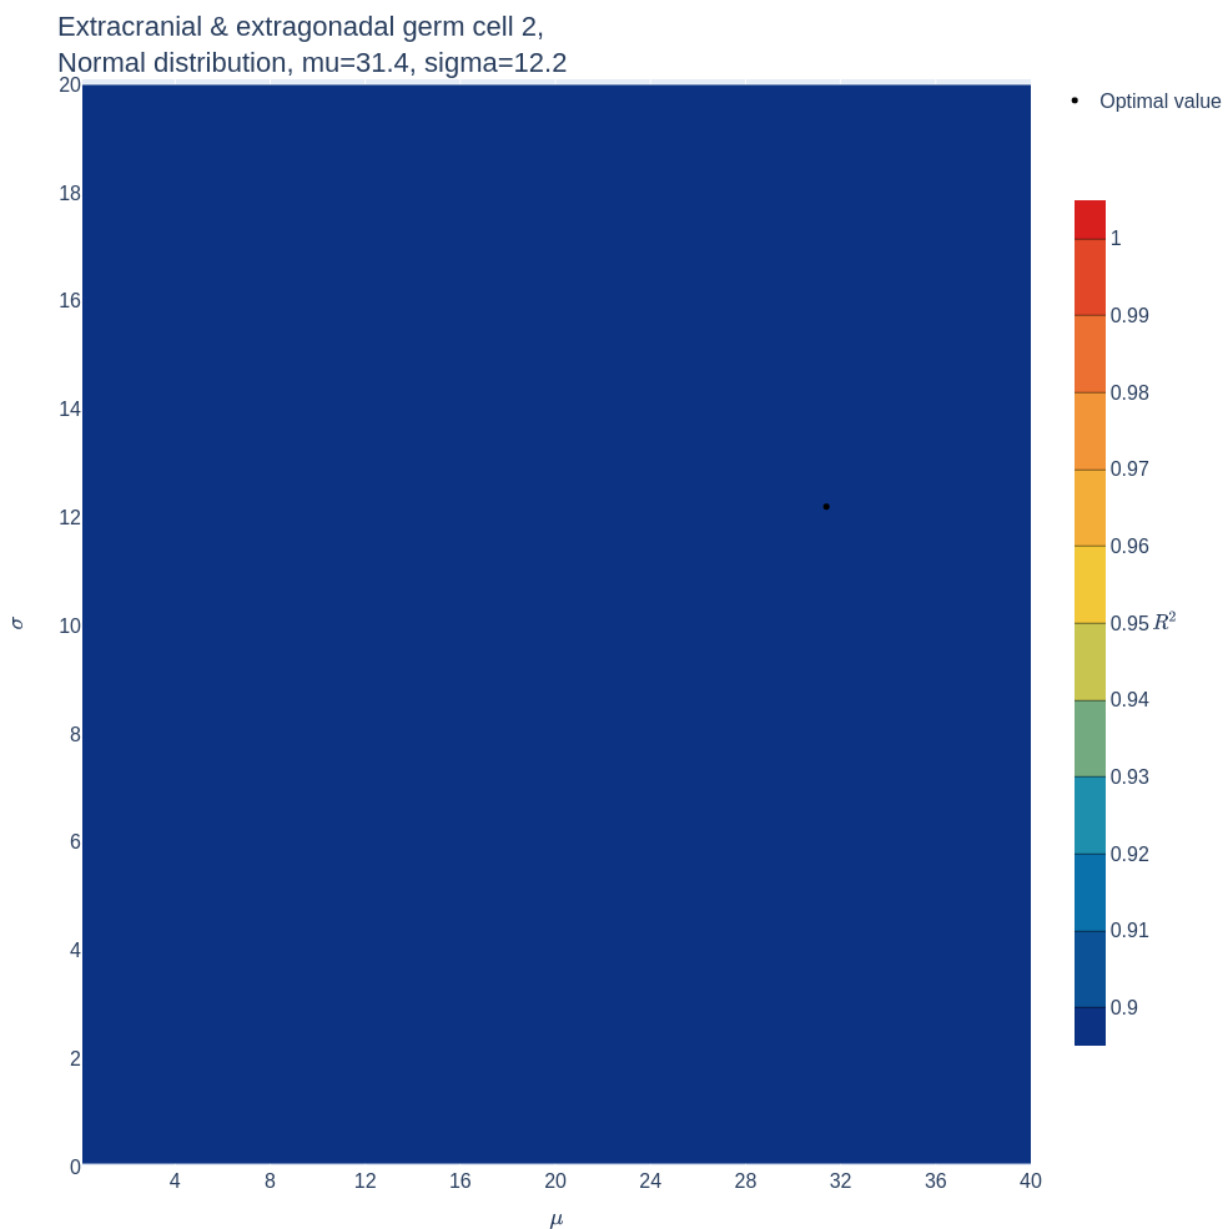

**Web Figure 33. Goodness of fit of the normal distribution to the age distribution of incidence of extracranial and extragonadal germ cell tumors of young adulthood as a function of various parameter combinations.**

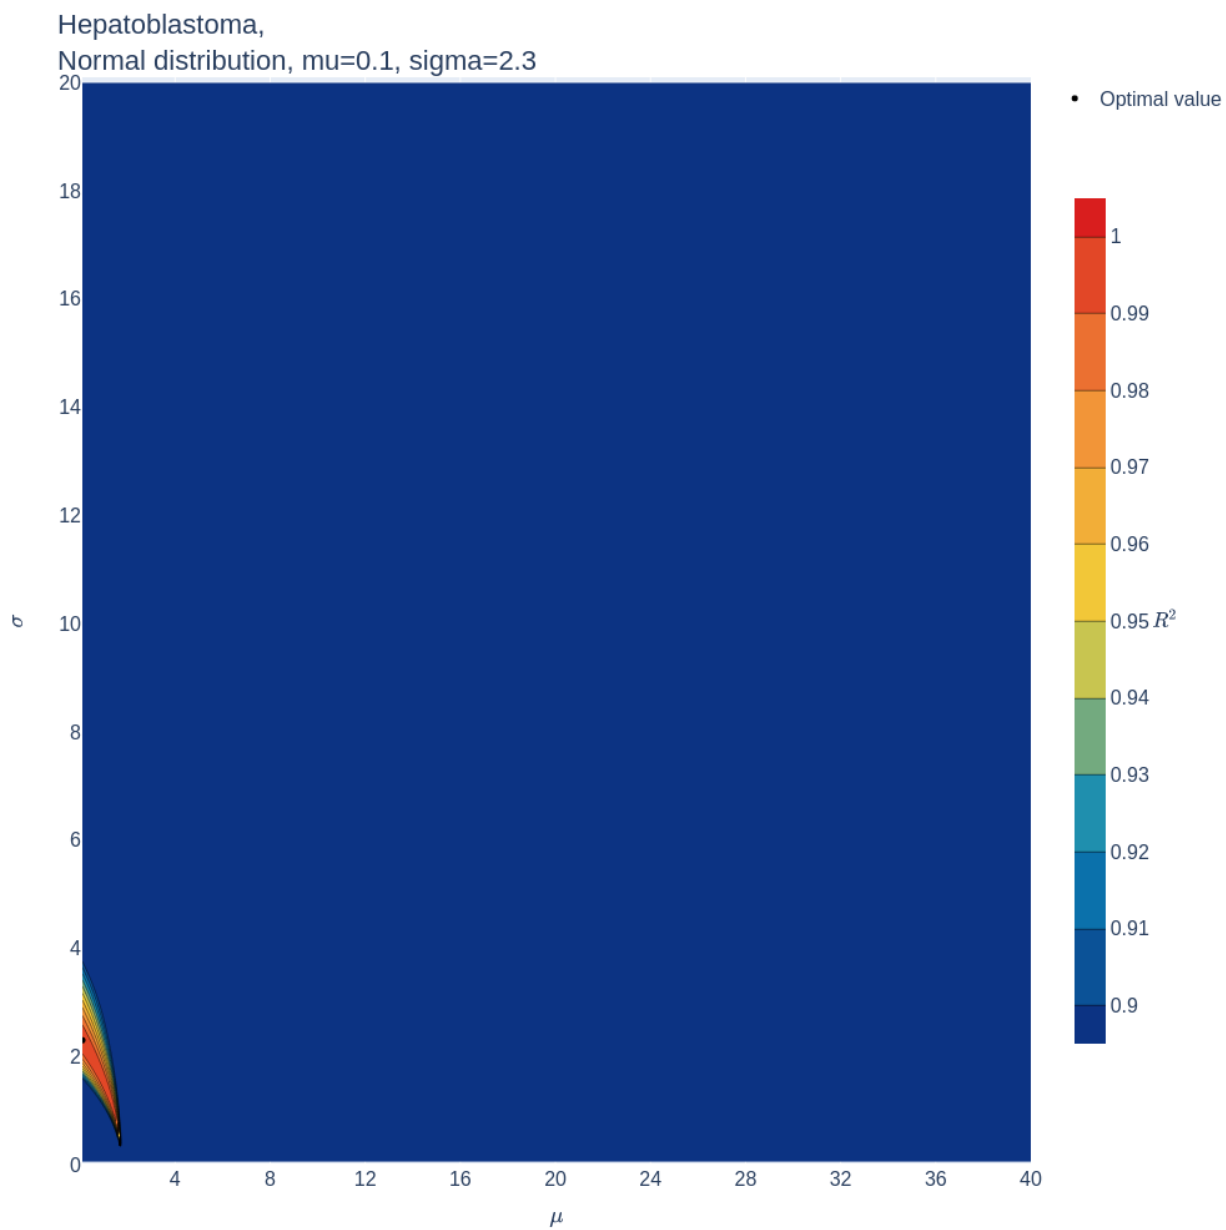

**Web Figure 34. Goodness of fit of the normal distribution to the age distribution of incidence of hepatoblastoma as a function of various parameter combinations.**

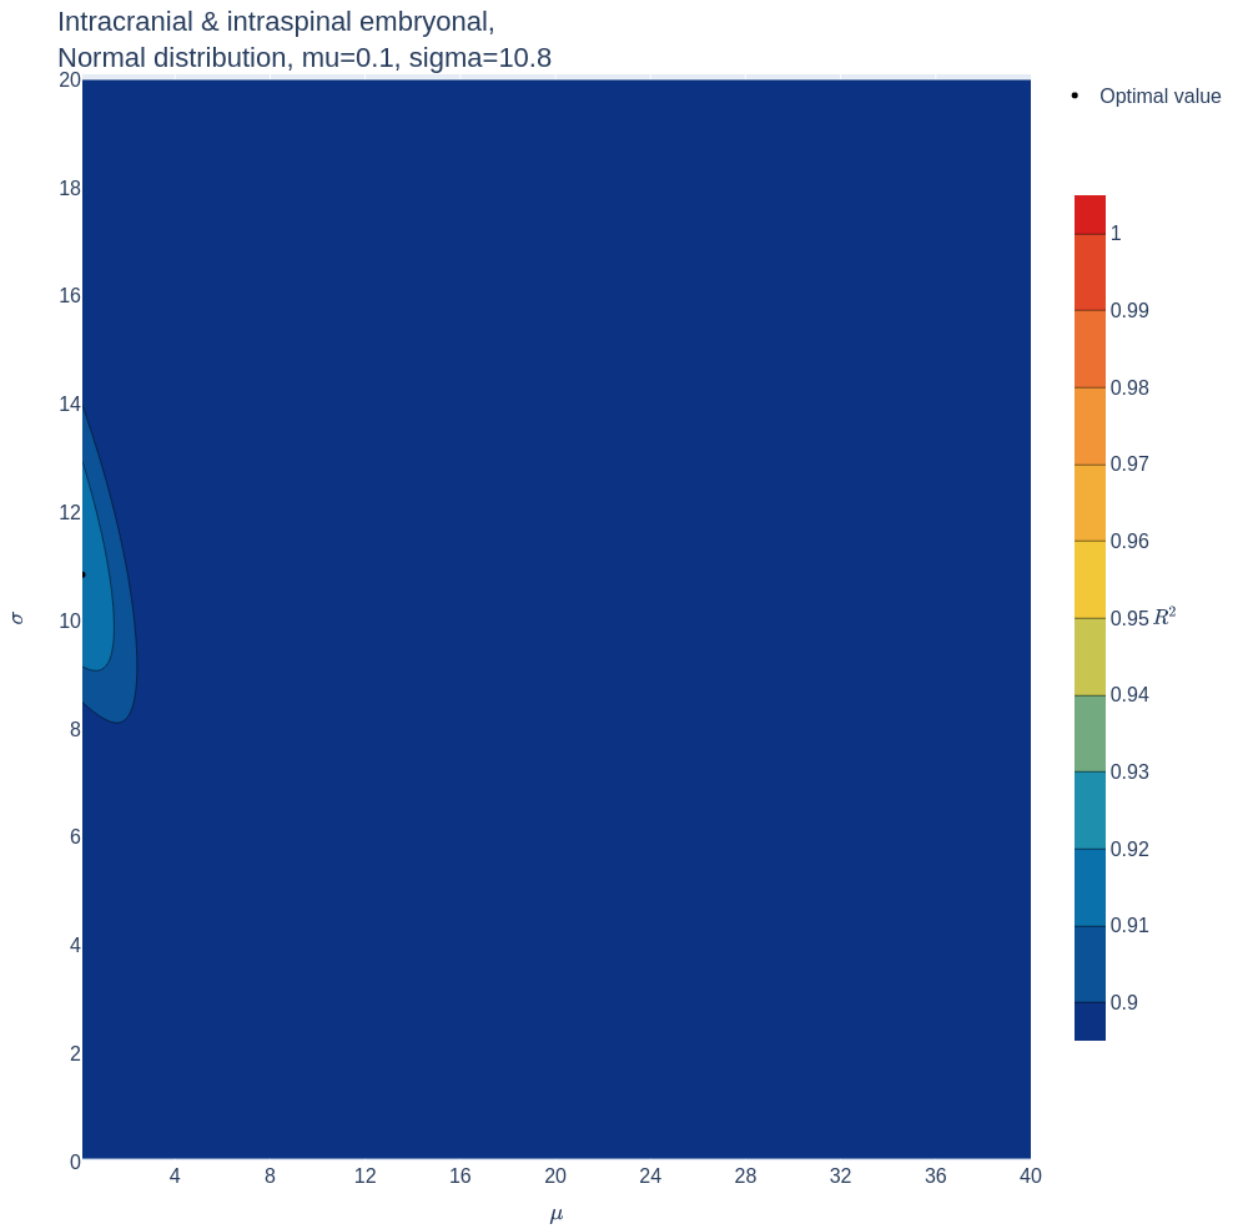

**Web Figure 35. Goodness of fit of the normal distribution to the age distribution of incidence of intracranial and intraspinal embryonal tumors as a function of various parameter combinations.**

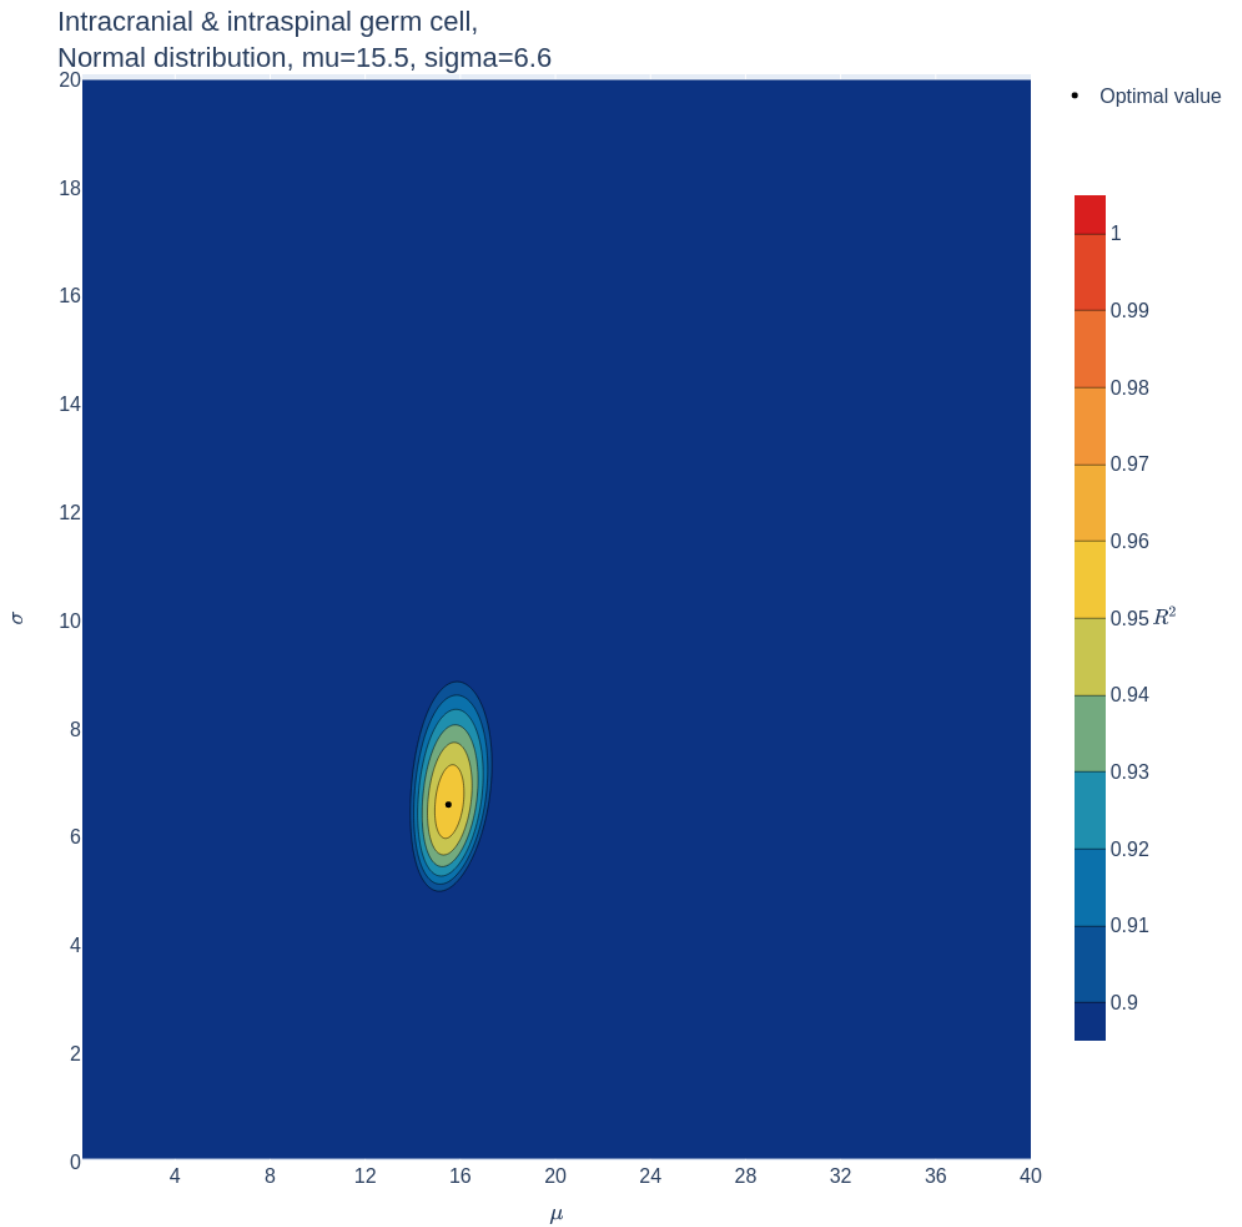

**Web Figure 36. Goodness of fit of the normal distribution to the age distribution of incidence of intracranial and intraspinal germ cell tumors as a function of various parameter combinations.**

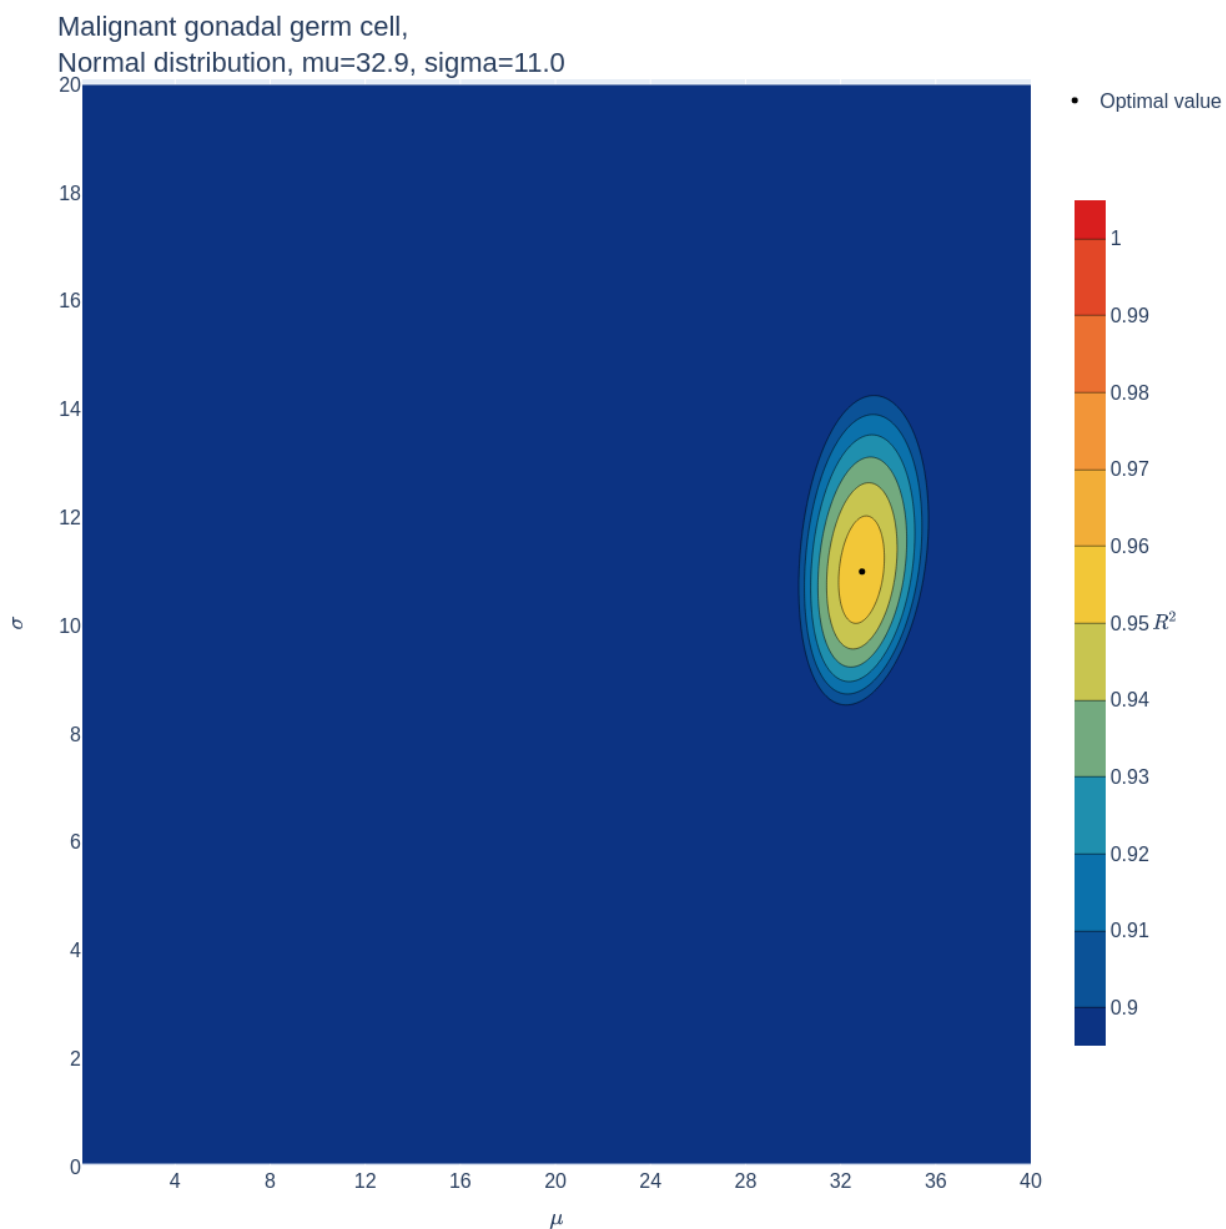

**Web Figure 37. Goodness of fit of the normal distribution to the age distribution of incidence of malignant gonadal germ cell tumors as a function of various parameter combinations.**

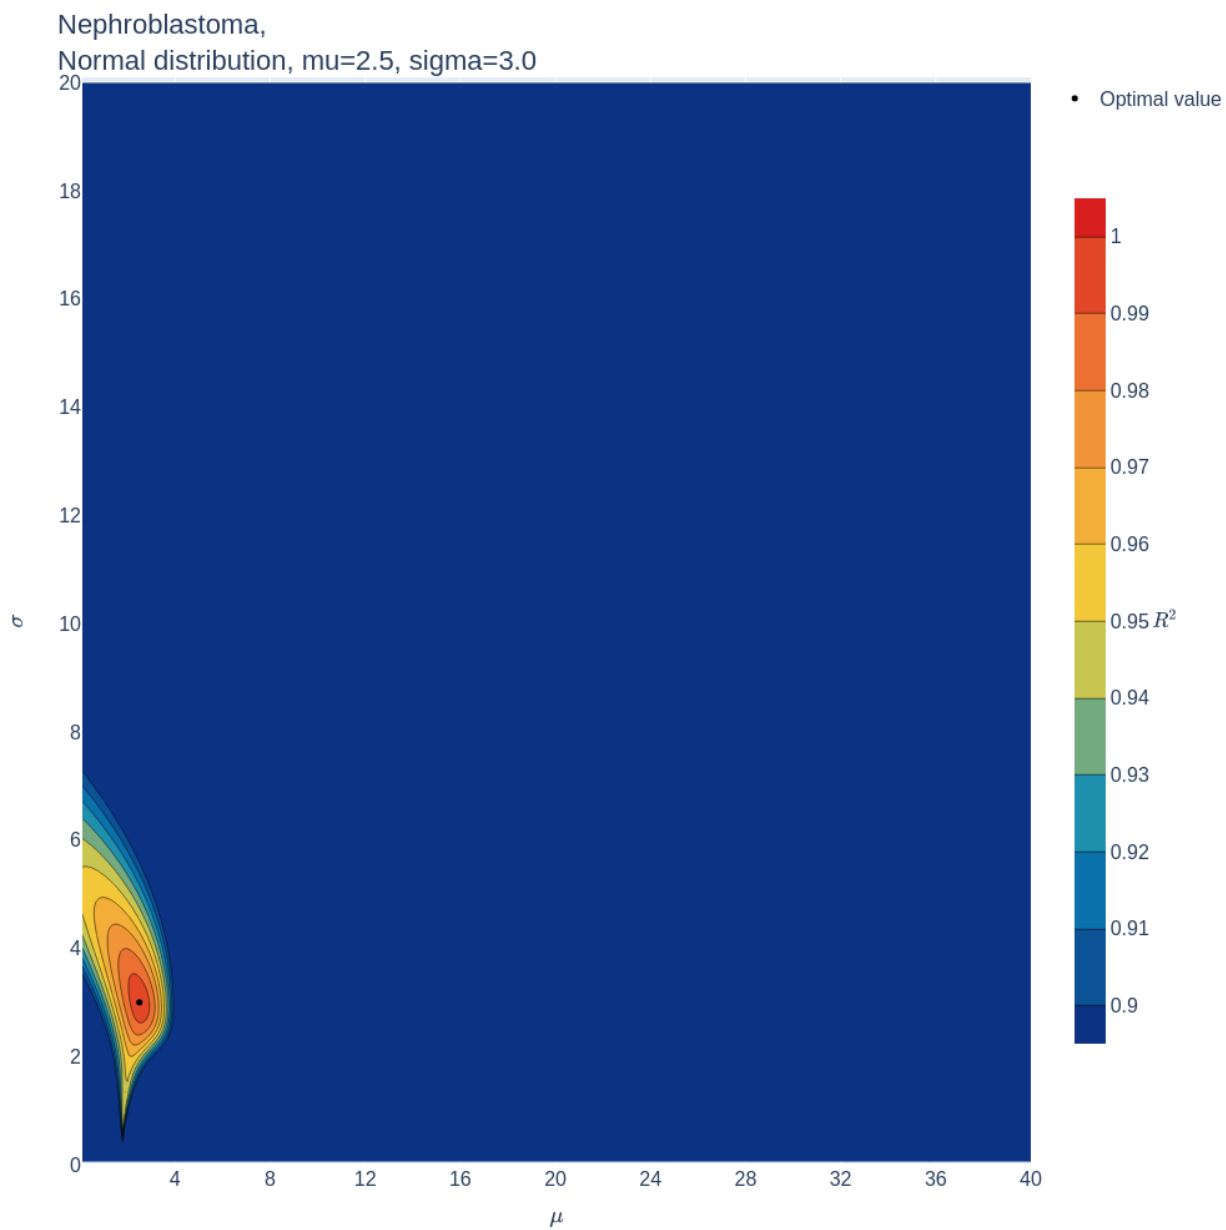

**Web Figure 38. Goodness of fit of the normal distribution to the age distribution of incidence of nephroblastoma as a function of various parameter combinations.**

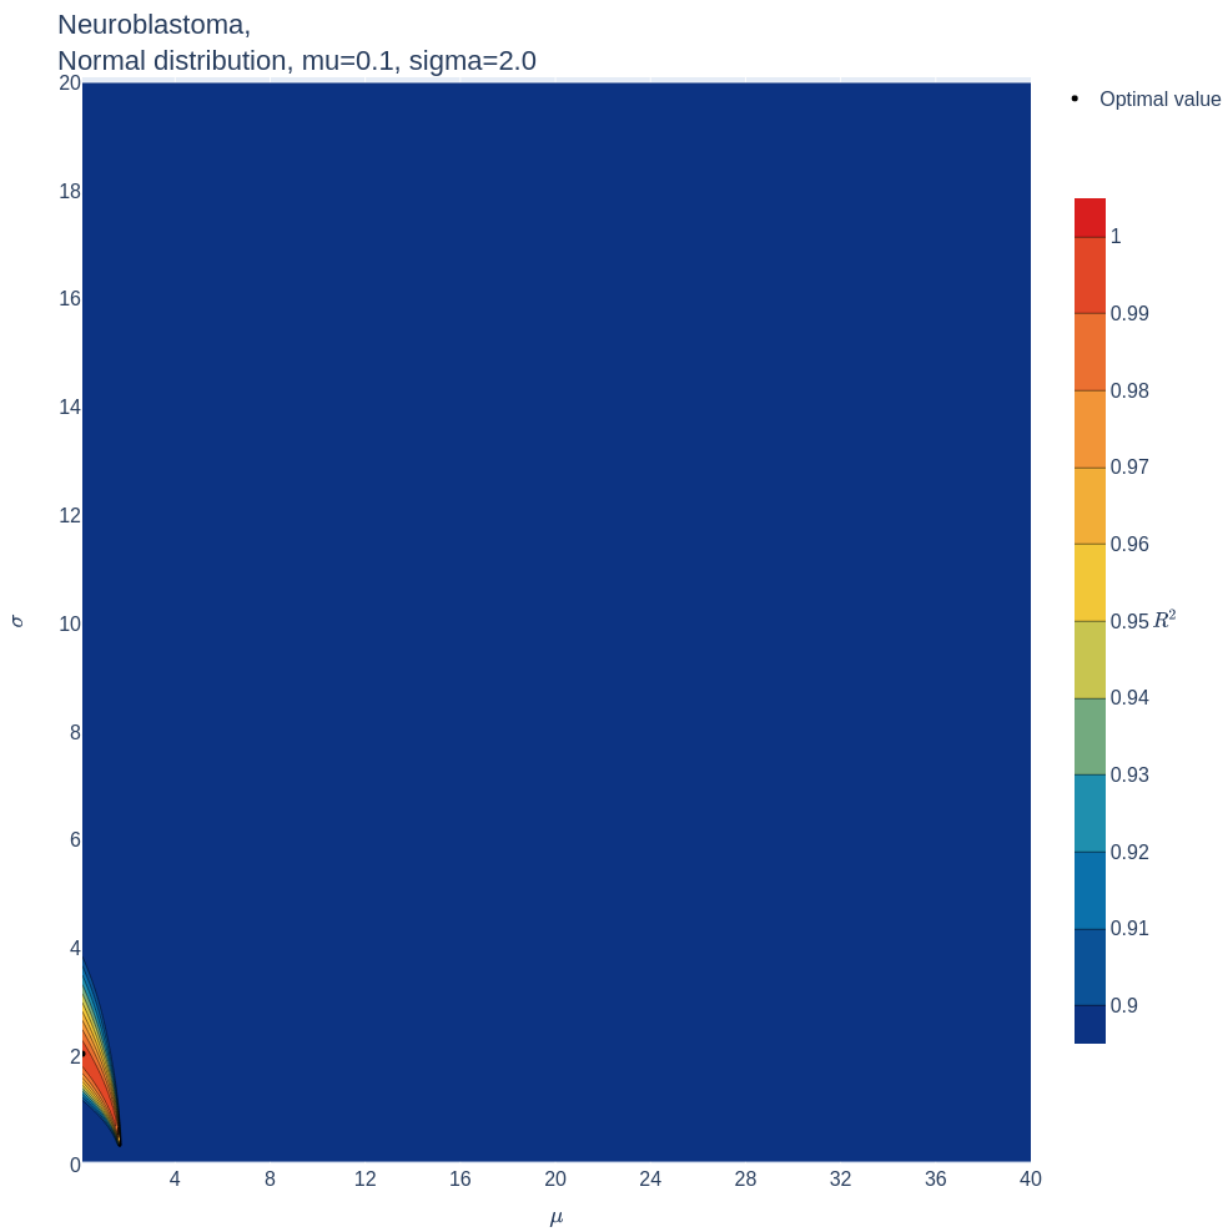

**Web Figure 39. Goodness of fit of the normal distribution to the age distribution of incidence of neuroblastoma as a function of various parameter combinations.**

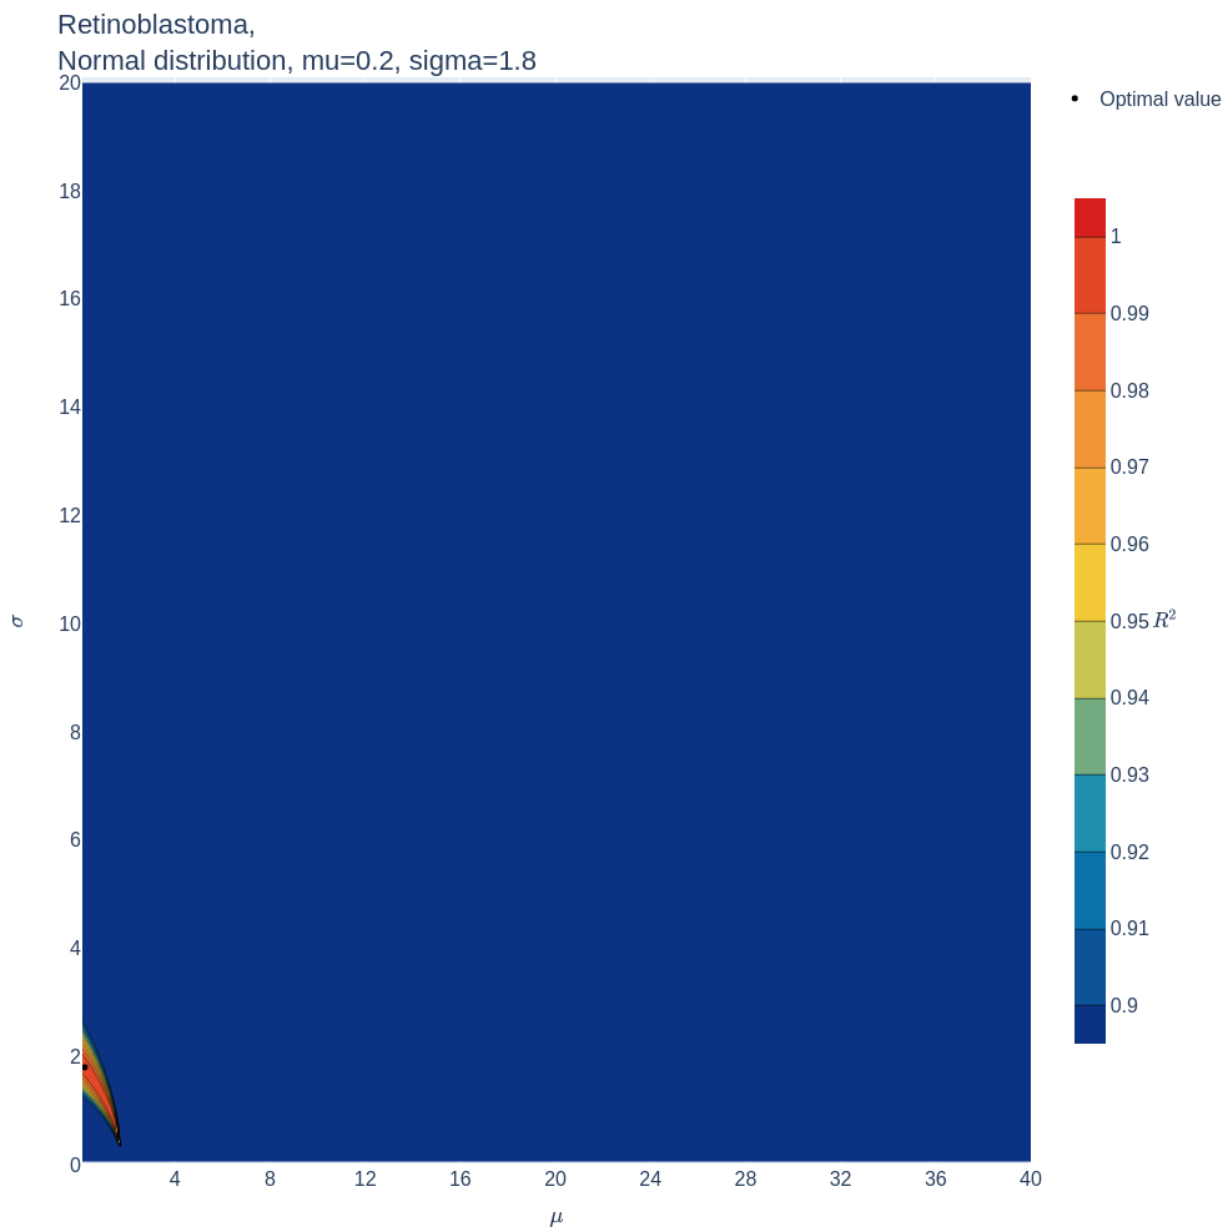

**Web Figure 40. Goodness of fit of the normal distribution to the age distribution of incidence of retinoblastoma as a function of various parameter combinations.**



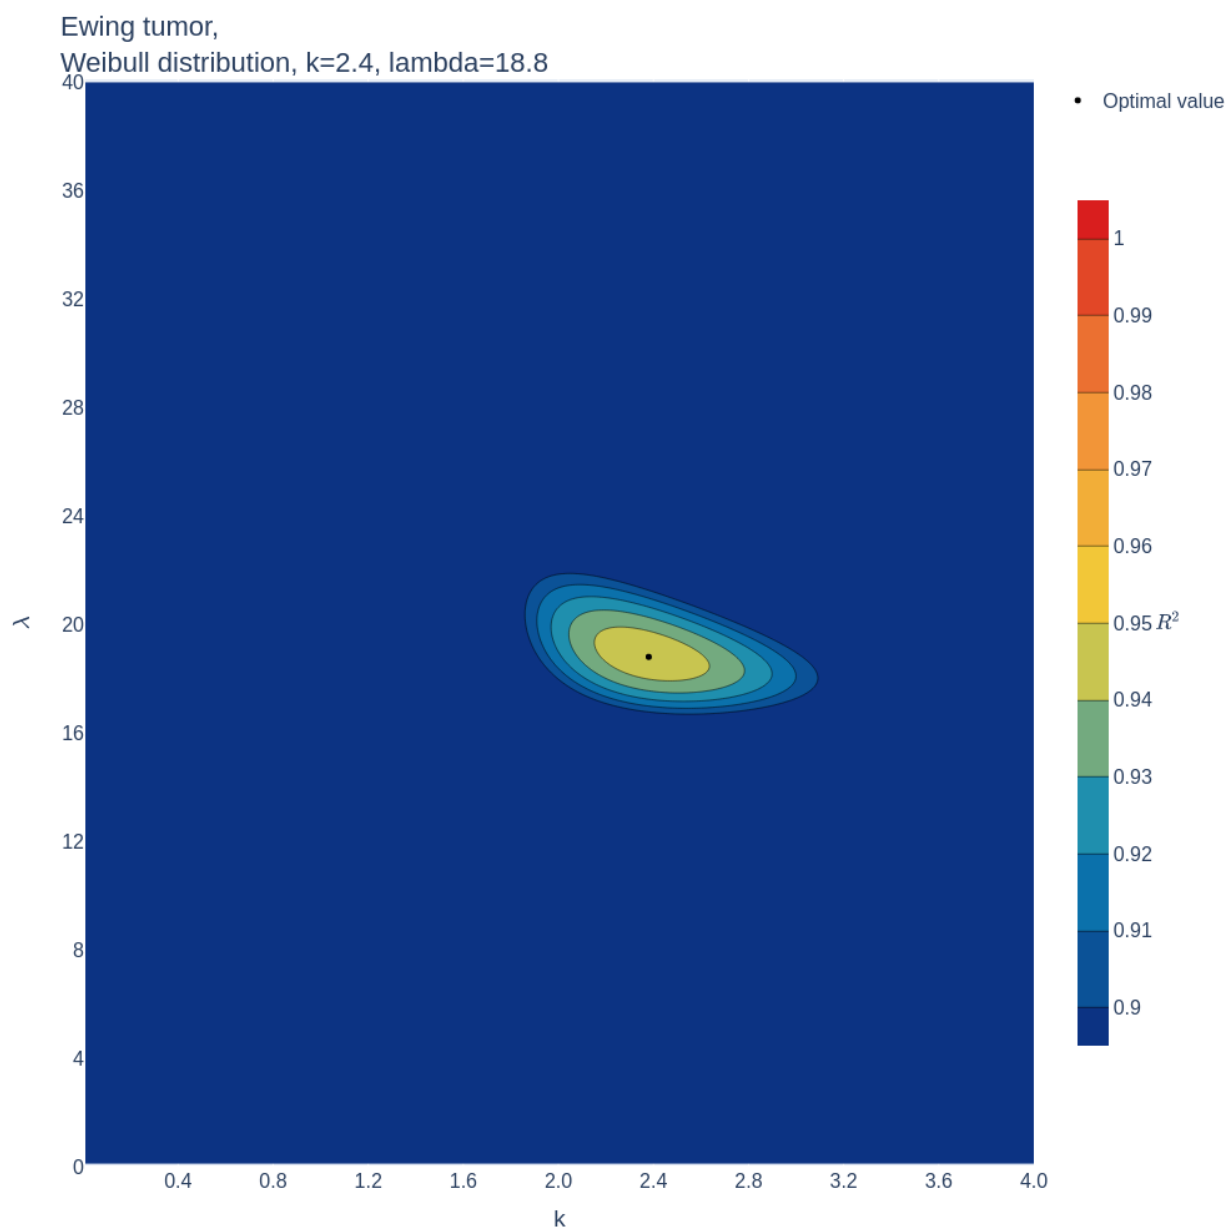

**Web Figure 41. Goodness of fit of the Weibull distribution to the age distribution of incidence of Ewing tumor as a function of various parameter combinations.**

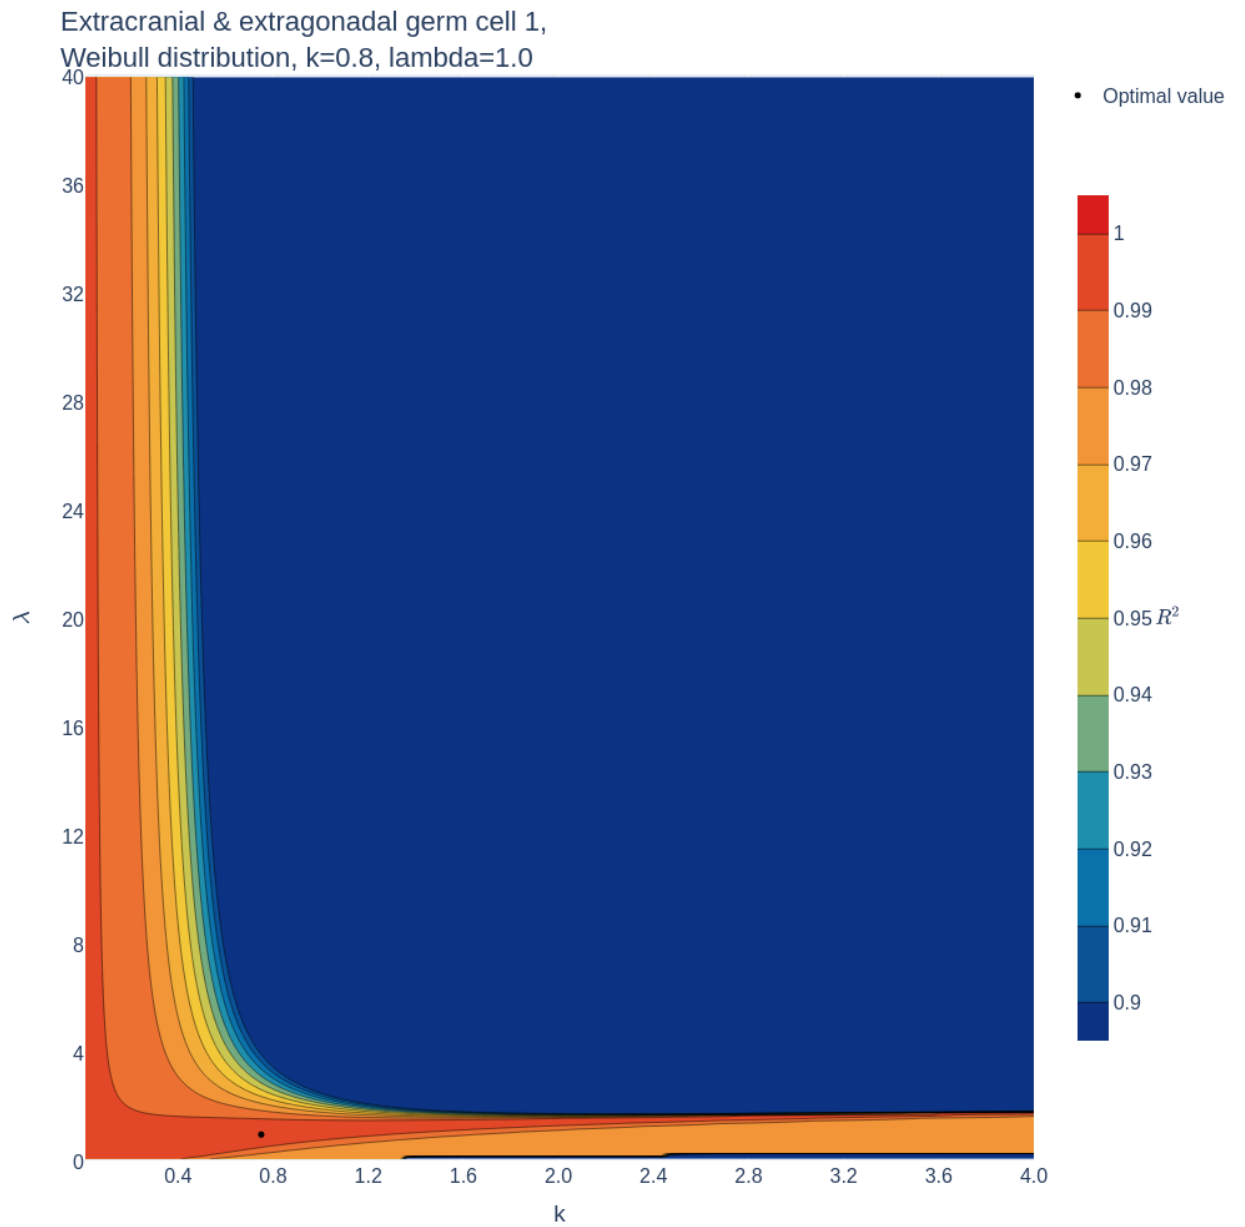

**Web Figure 42. Goodness of fit of the Weibull distribution to the age distribution of incidence of extracranial and extragonadal germ cell tumors of childhood as a function of various parameter combinations.**

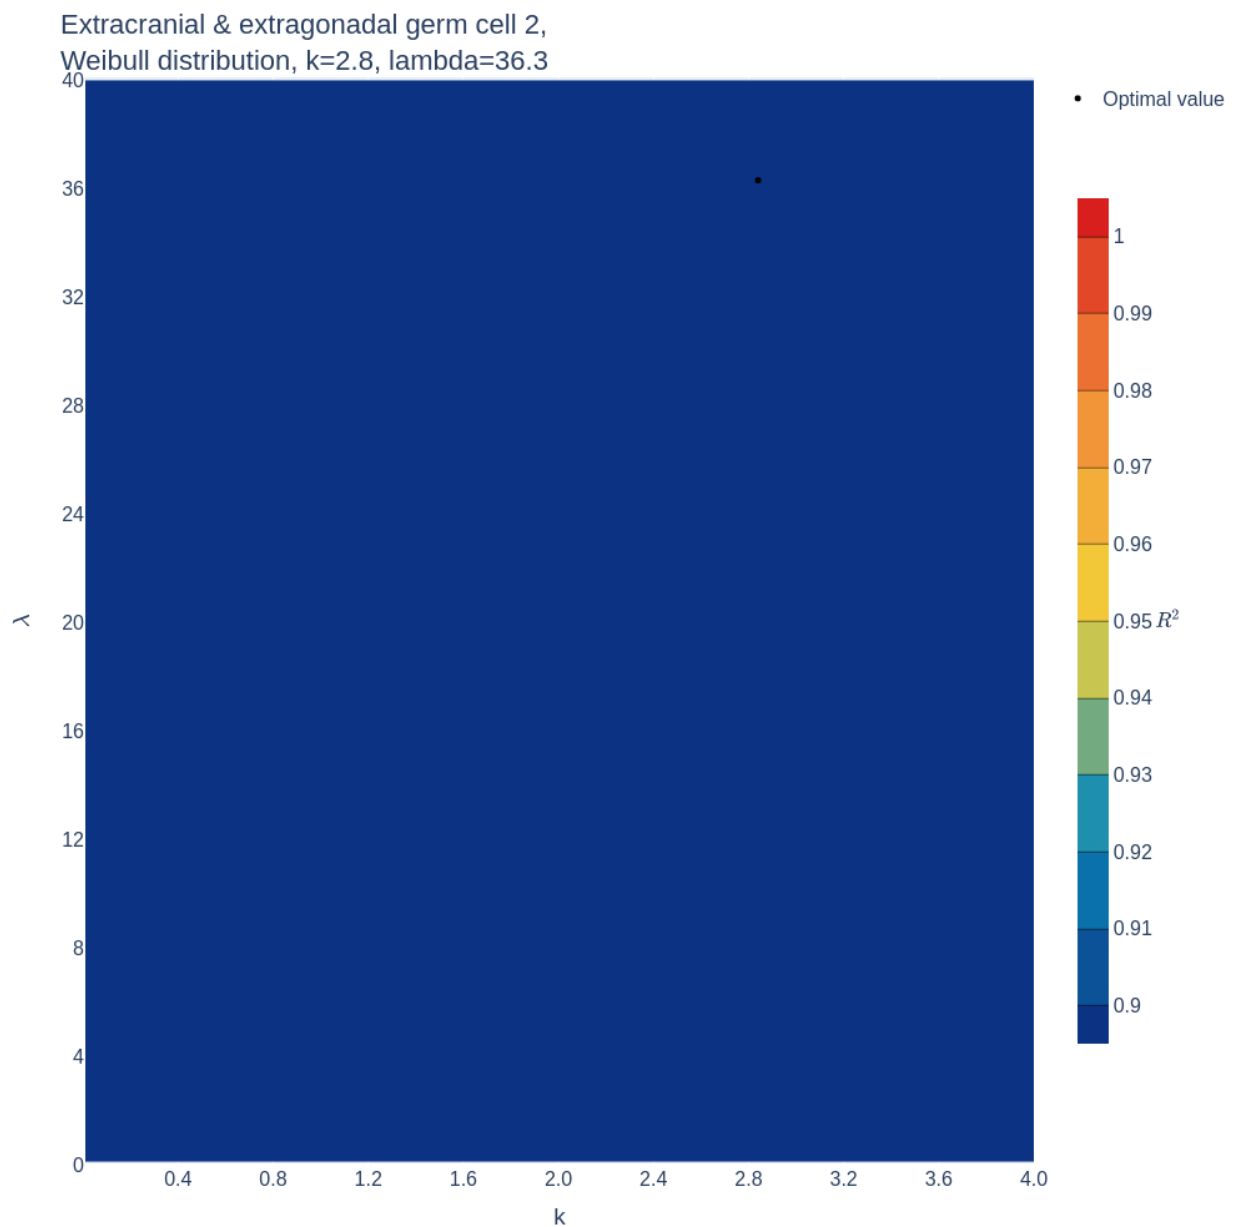

**Web Figure 43. Goodness of fit of the Weibull distribution to the age distribution of incidence of extracranial and extragonadal germ cell tumors of young adulthood as a function of various parameter combinations.**

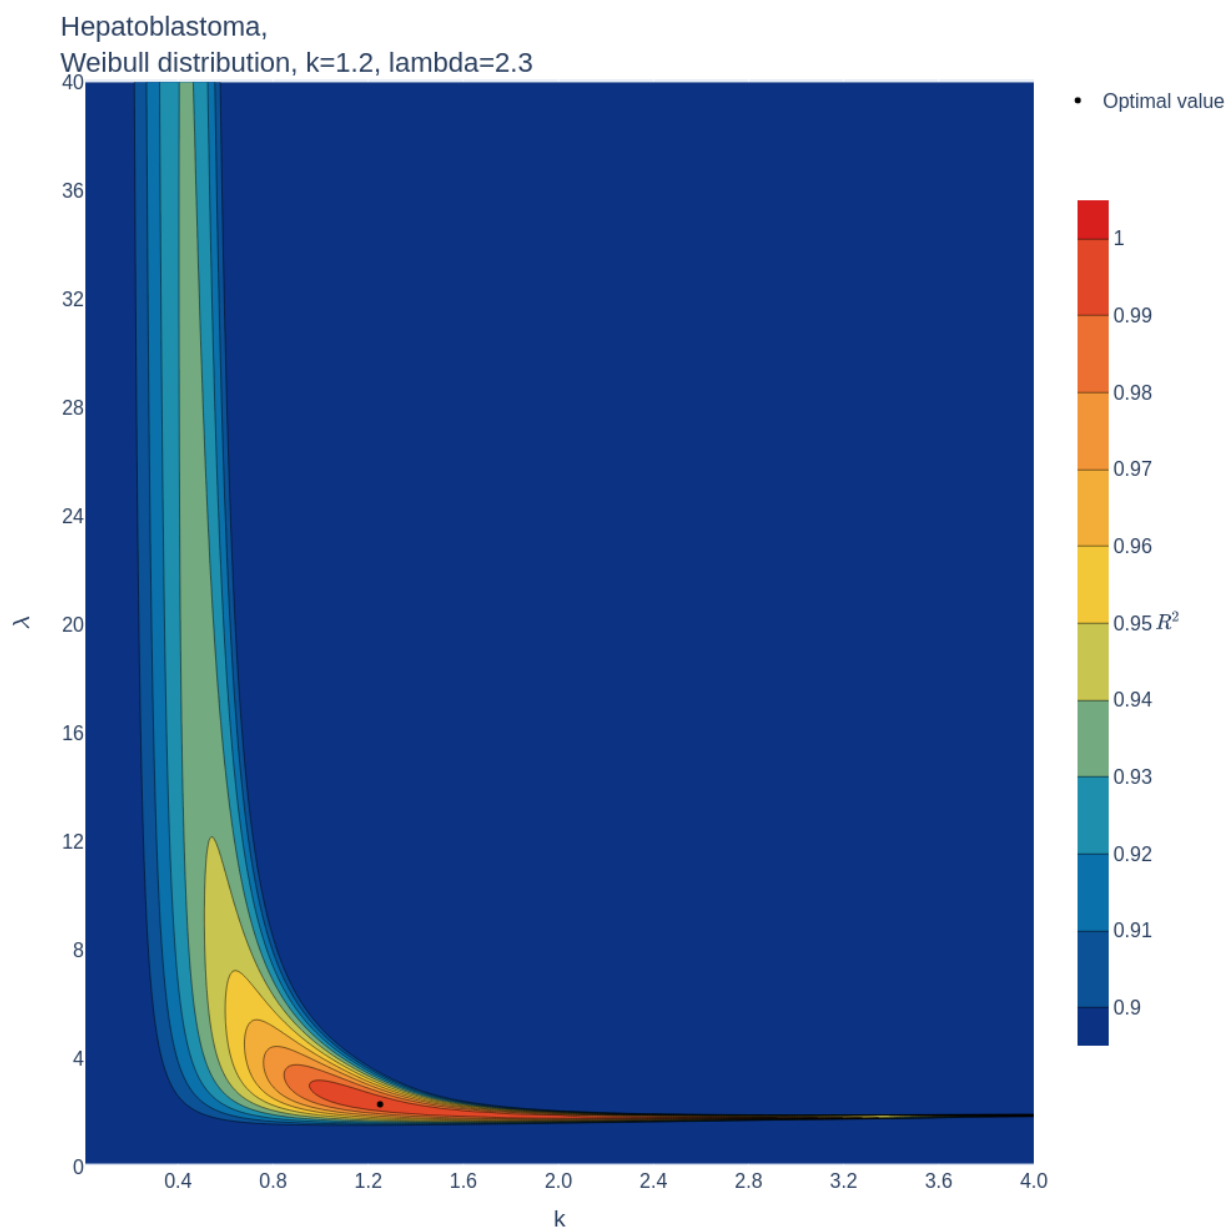

**Web Figure 44. Goodness of fit of the Weibull distribution to the age distribution of incidence of hepatoblastoma as a function of various parameter combinations.**

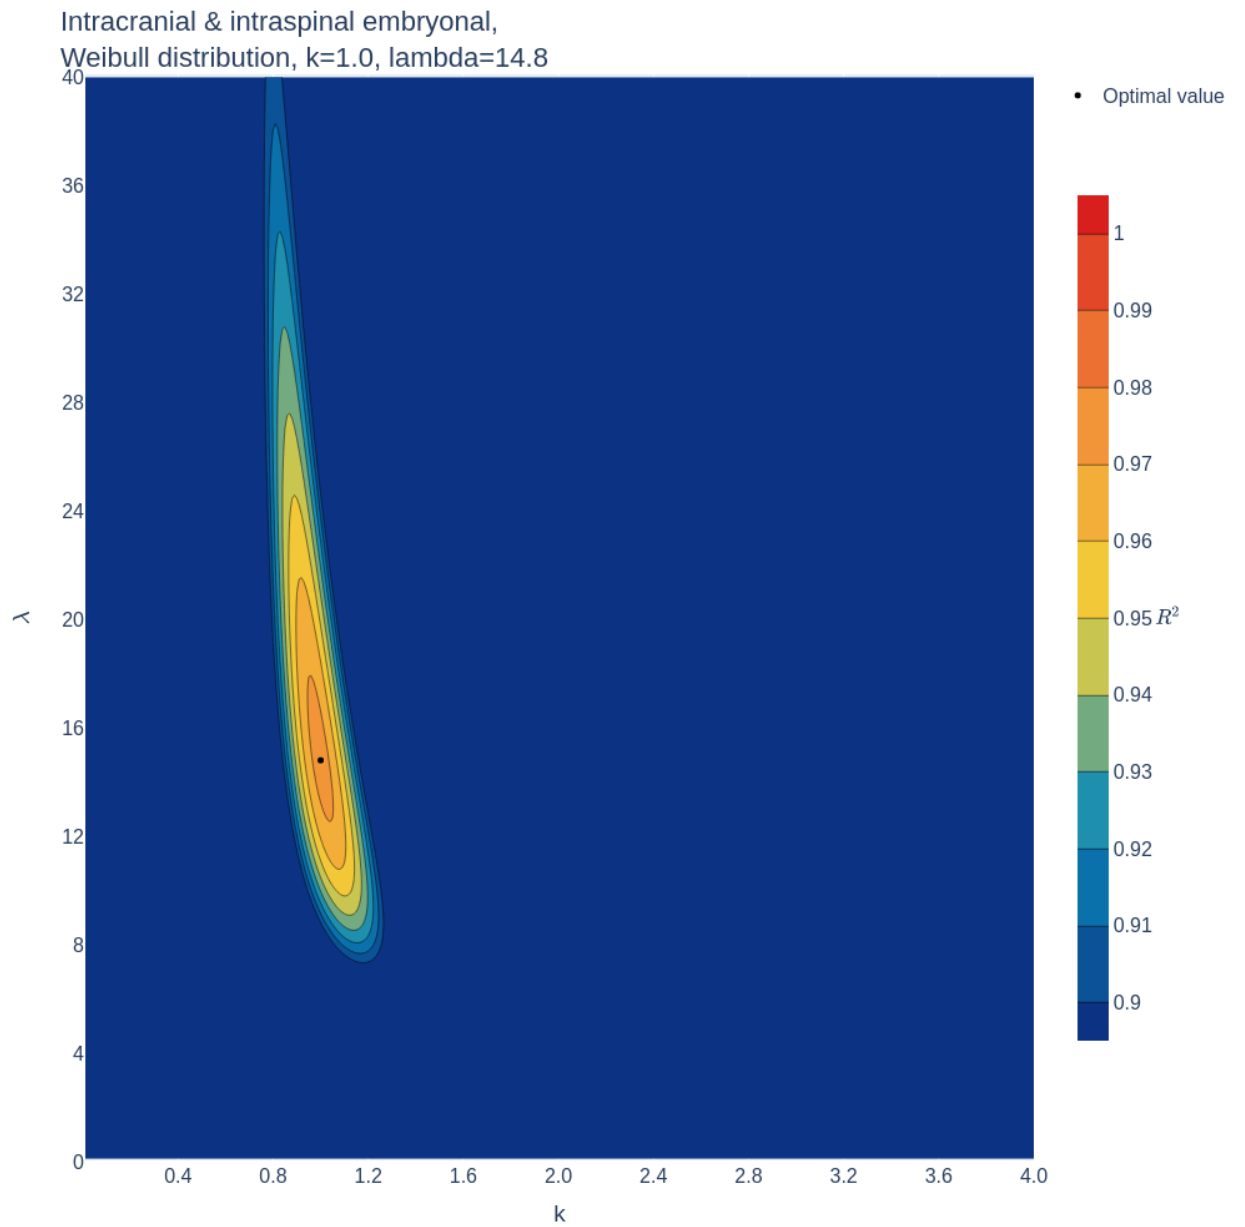

**Web Figure 45. Goodness of fit of the Weibull distribution to the age distribution of incidence of intracranial and intraspinal embryonal tumors as a function of various parameter combinations.**

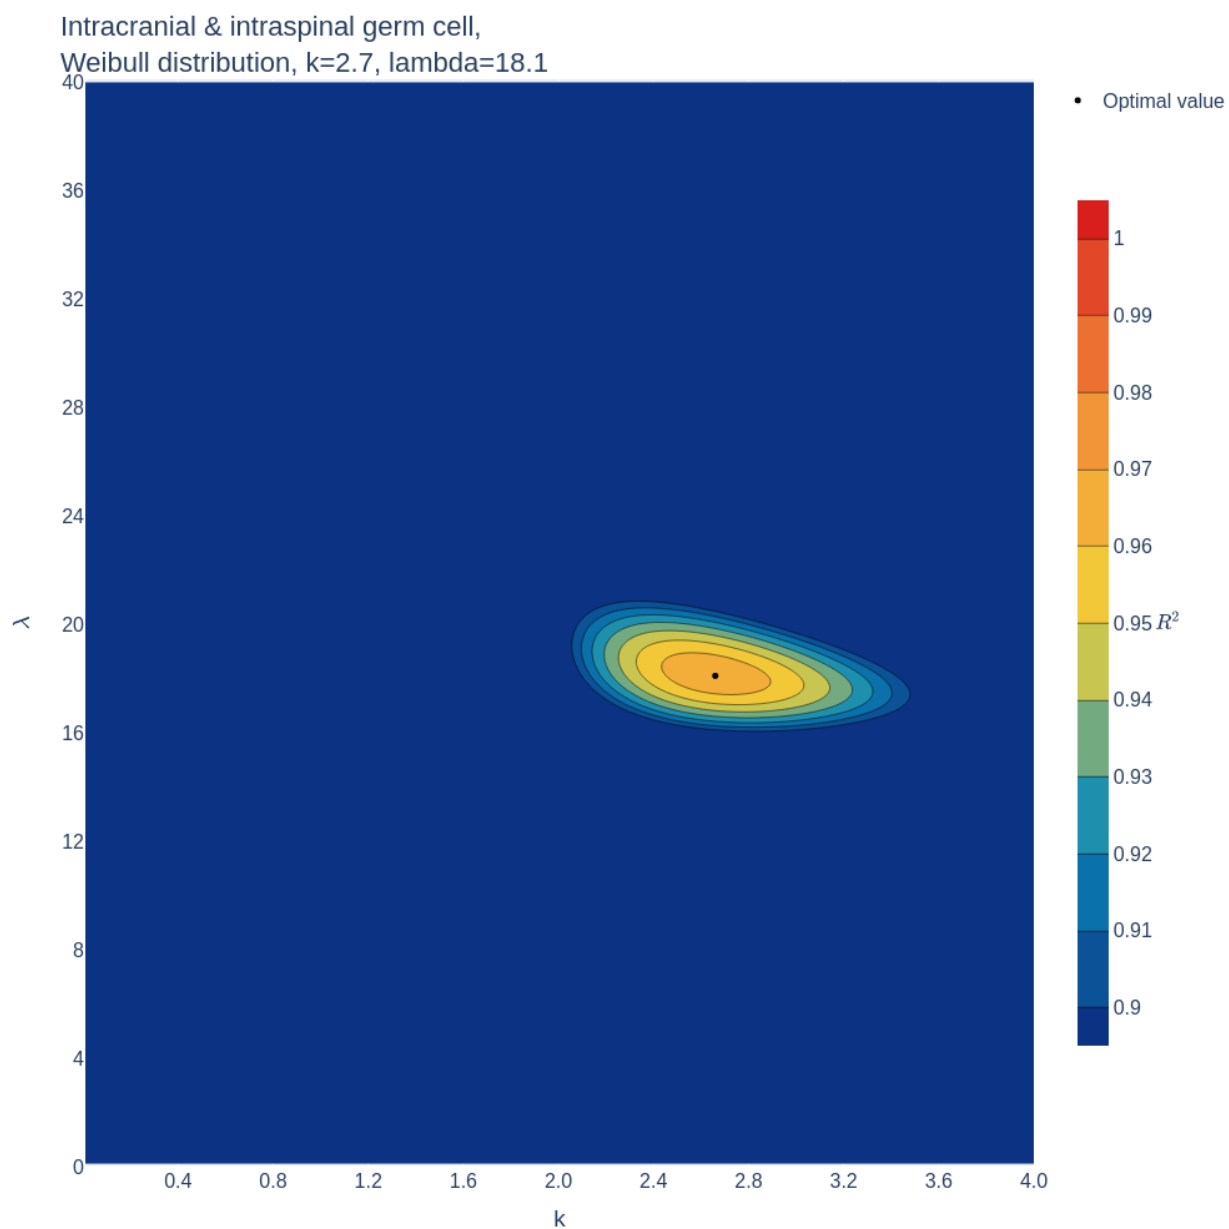

**Web Figure 46. Goodness of fit of the Weibull distribution to the age distribution of incidence of intracranial and intraspinal germ cell tumors as a function of various parameter combinations.**

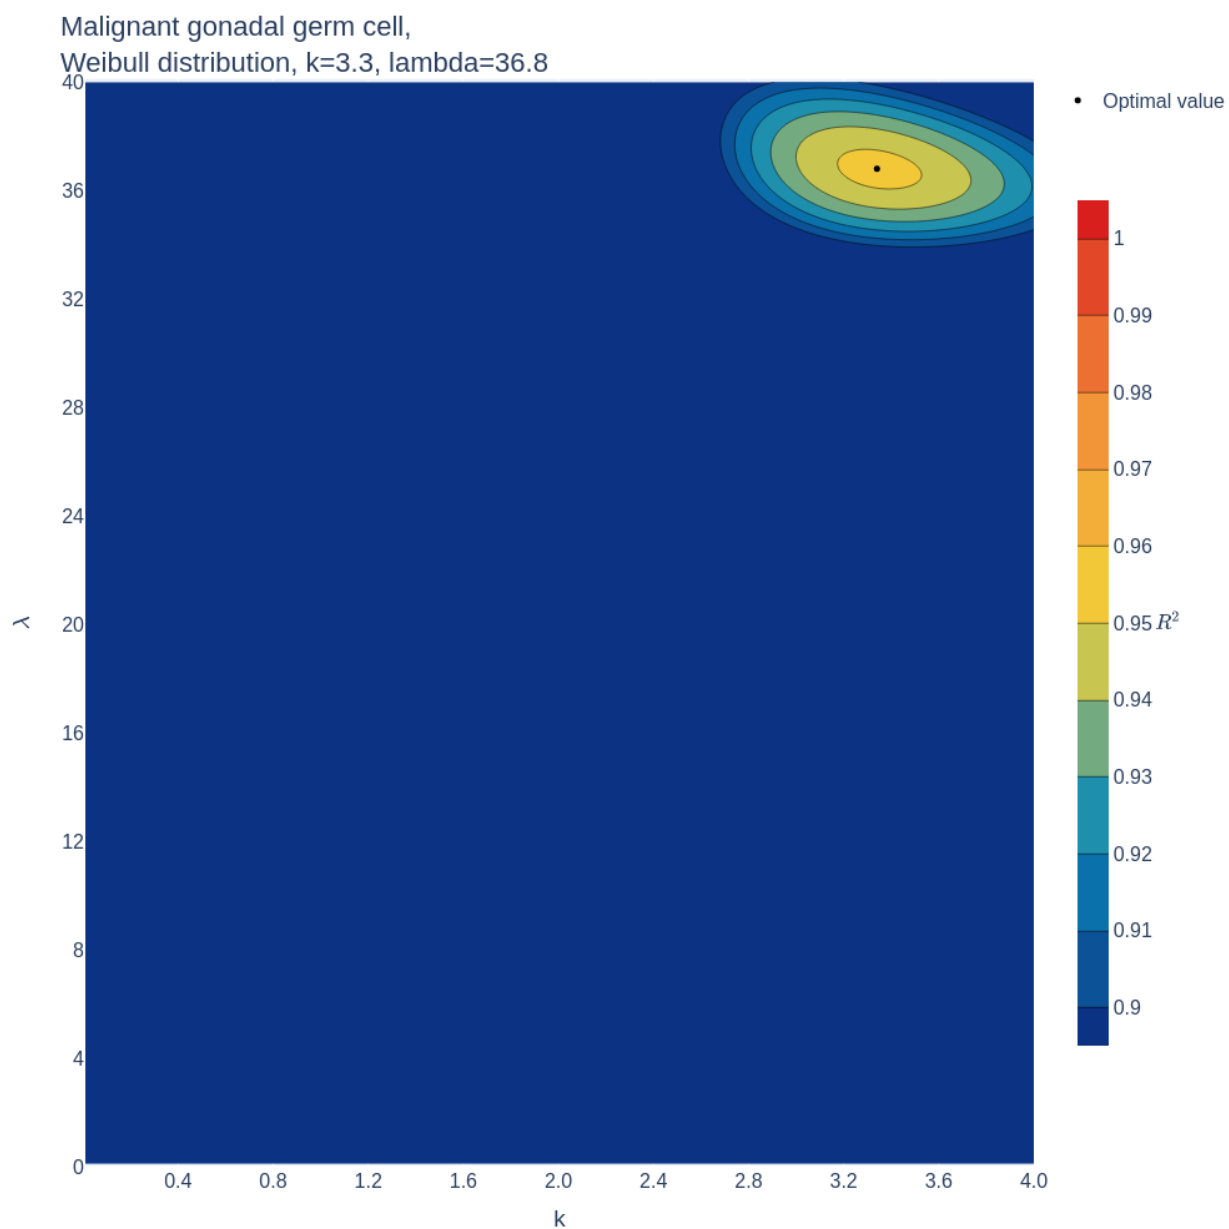

**Web Figure 47. Goodness of fit of the Weibull distribution to the age distribution of incidence of malignant gonadal germ cell tumors as a function of various parameter combinations.**

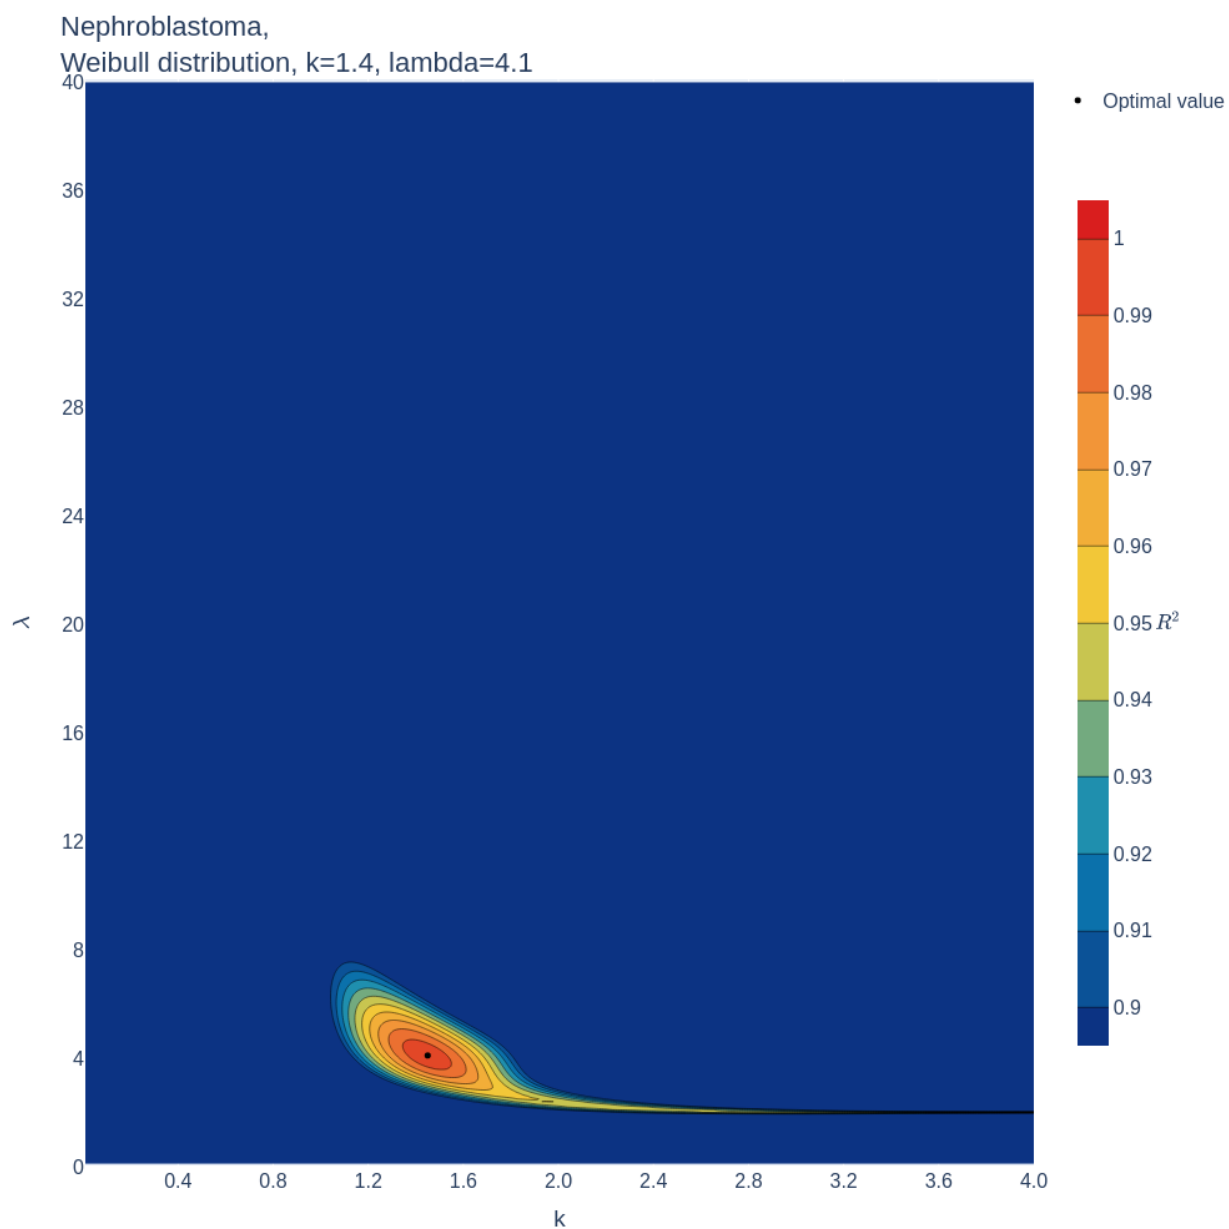

**Web Figure 48. Goodness of fit of the Weibull distribution to the age distribution of incidence of nephroblastoma as a function of various parameter combinations.**



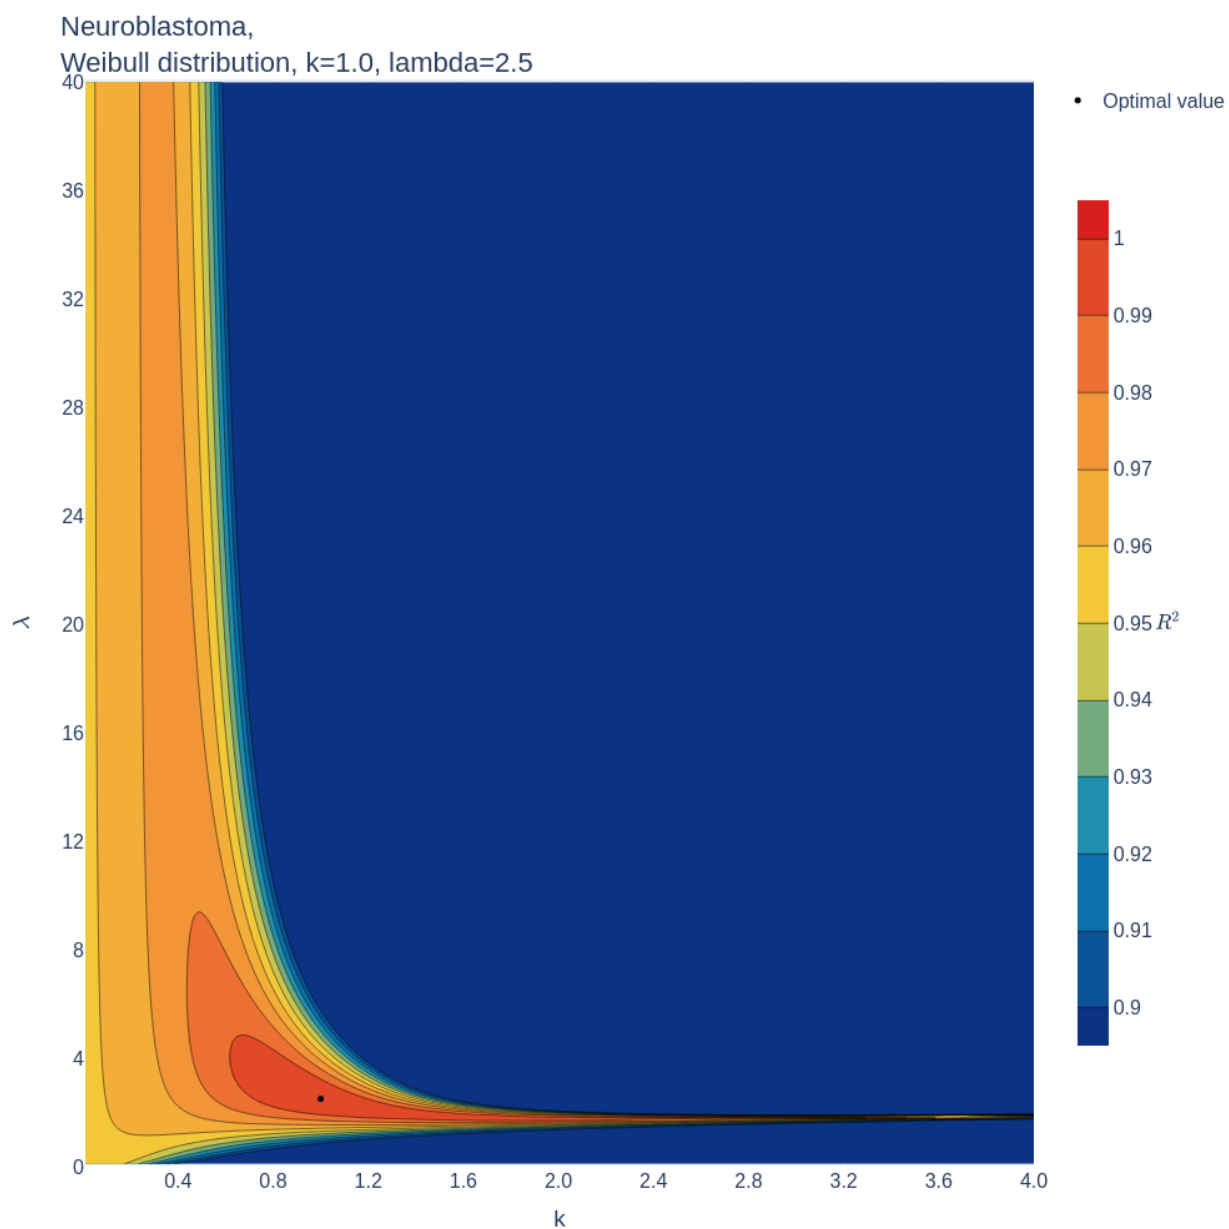

**Web Figure 49. Goodness of fit of the Weibull distribution to the age distribution of incidence of neuroblastoma as a function of various parameter combinations.**

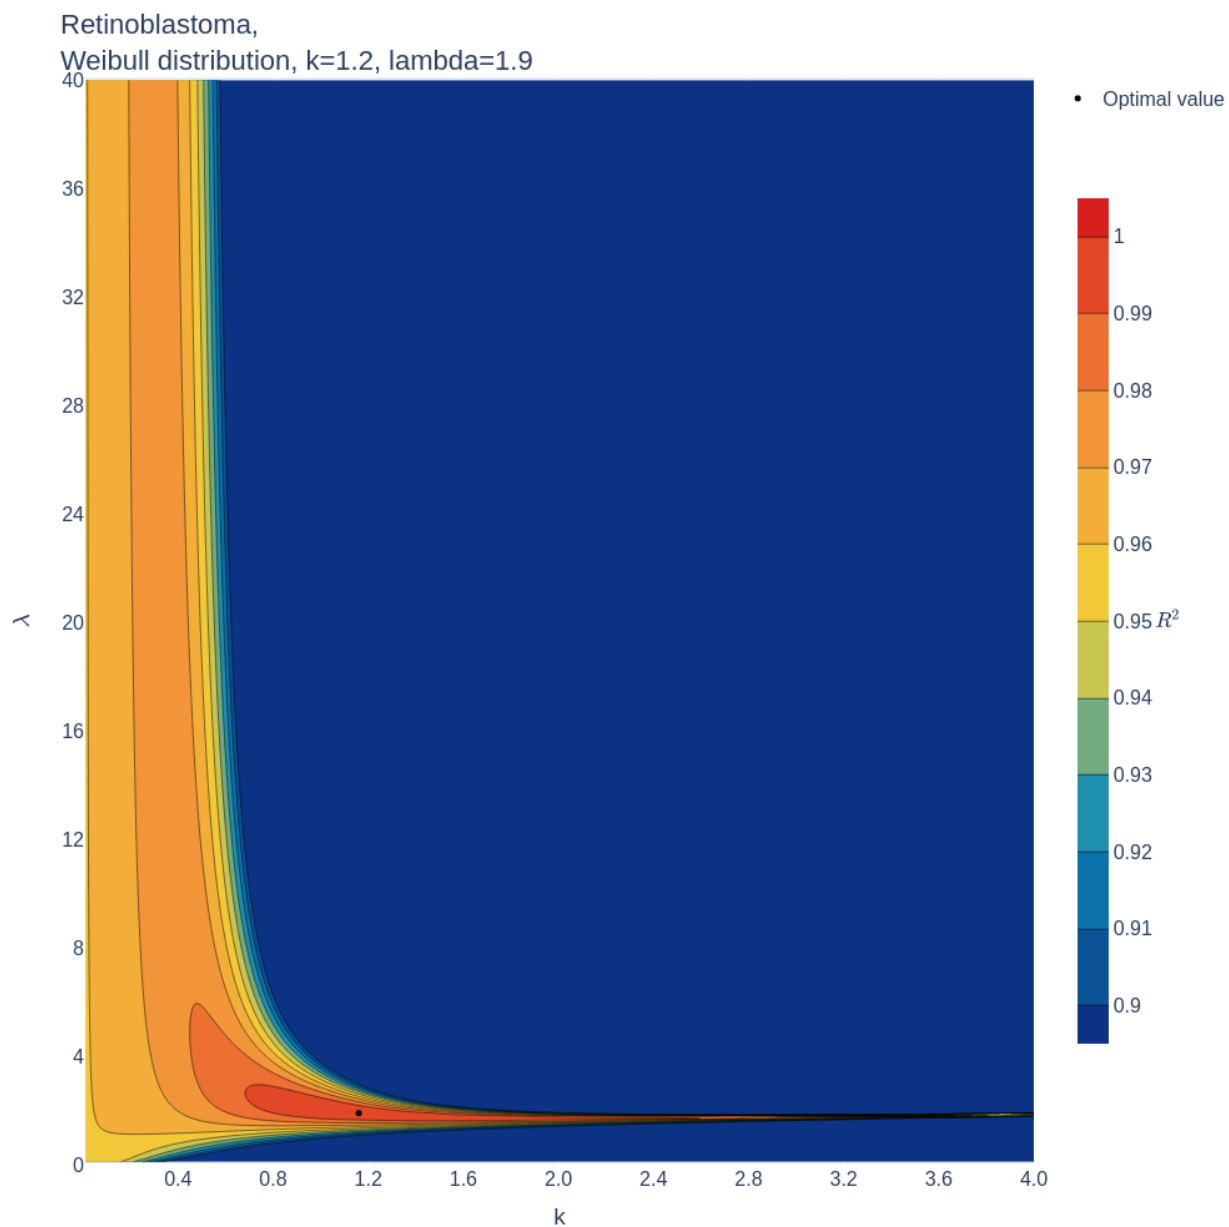

**Web Figure 50. Goodness of fit of the Weibull distribution to the age distribution of incidence of retinoblastoma as a function of various parameter combinations.**
